# Supplementary material for: Bite and tooth marks on sauropod dinosaurs from the Morrison Formation
Source: PeerJ. 2023 Nov 14;11:e16327. doi: 10.7717/peerj.16327 (PMC10655710; doi:10.7717/peerj.16327)
Supplement: Supplemental Information 1 — All the raw data of bite traces on sauropod bones, the taxonomic and anatomical identity of the elements and the basic calculations of abundances and references for all Supplemental Files. [file peerj-11-16327-s001.xlsx]

## Sheet: a Guide and References
Bite and tooth marks on sauropod dinosaurs from the Morrison Formation
Roberto Lei, Emanuel Tschopp, Christophe Hendrickx, Mathew Wedel, Mark A. Norell, David William Elliott Hone
Summary of documents and references for all supplementary materials
1) Supplementary Data 1 (this document)
a. This information and references
b. Table of specimens with bite traces, their taxonomy, and locality information
2) Supplementary Data 2
a. Table of specimens with bite traces, types of bite traces, and info on how it was documented and measured
3) Supplementary Data 3
a. Table of measurements from AMNH FARB specimens with bite traces
i. Each letter below the catalog numbers of the single specimens refer to single bite traces
ii. Numbers refer to single fossils belonging to the same specimen
iii. Areas refer to specific parts of the same fossil, each bearing bite traces; since such areas are located relatively far from each other they were documented through distinct photos
4) Supplementary Data 4
a. Crown-based measurements of teeth from theropod taxa from the Morrison Formation, USA, and the Lourinha Formation, Portugal
5) Supplementary Data 5
a. Updated formulas and data from Drumheller et al. (2020) for body size estimation of trace maker.
References
Carpenter K. 2019. History and geology of the Cope’s Nipple Quarries in Garden Park, Colorado—type locality of giant sauropods in the Upper Jurassic Morrison Formation. Geology of the Intermountain West 6:31–53. DOI: 10.31711/giw.v6.pp31-53.
Chure DJ, Fiorillo AR, Jacobsen A. 1998. Prey bone utilization by predatory dinosaurs in the Late Jurassic of North America, with comments on prey bone use by dinosaurs throughout the Mesozoic. Gaia 15:227–232.
Cope ED. 1877. On a gigantic saurian from the Dakota epoch of Colorado. Paleontological Bulletin 25:5–10.
Drumheller SK, McHugh JB, Kane M, Riedel A, D’Amore DC. 2020. High frequencies of theropod bite marks provide evidence for feeding, scavenging, and possible cannibalism in a stressed Late Jurassic ecosystem. PLOS ONE 15:e0233115. DOI: 10.1371/journal.pone.0233115.
Foster JR. 2003. Paleoecological analysis of the vertebrate fauna of the Morrison Formation (Upper Jurassic), Rocky Mountain Region, U.S.A. New Mexico Museum of Natural History and Science Bulletin 23:2–100.
Foster J, Hunt-Foster R, Gorman M, Trujillo K, Suarez C, McHugh J, Peterson J, Warnock J, Schoenstein H. 2018. Paleontology, taphonomy, and sedimentology of the Mygatt-Moore Quarry, a large dinosaur bonebed in the Morrison Formation, western Colorado—Implications for Upper Jurassic dinosaur preservation modes. Geology of the Intermountain West 5:23–93. DOI: 10.31711/giw.v5.pp23-93.
Harris JD. 2007. The appendicular skeleton of Suuwassea emilieae (Sauropoda: Flagellicaudata) from the Upper Jurassic Morrison Formation of Montana (USA). Geobios 40:501–522.
Harris JD, Dodson P. 2004. A new diplodocoid sauropod dinosaur from the Upper Jurassic Morrison Formation of Montana, USA. Acta Palaeontologica Polonica 49:197–210.
Hone DWE, Chure DJ. 2018. Difficulties in assigning trace makers from theropodan bite marks: an example from a young diplodocoid sauropod. Lethaia 51:456–466. DOI: 10.1111/let.12267.
Hunt AP, Meyer CA, Lockley MG, Lucas SG. 1994. Archaeology, toothmarks and sauropod dinosaur taphonomy. Gaia 10:225–231.
Ikejiri T. 2005. Distribution and biochronology of Camarasaurus (Dinosauria, Sauropoda) from the Jurassic Morrison Formation of the Rocky Mountain Region. New Mexico Geological Society Field Conference Guidebook, Geology of the Chama Basin 56:367–379.
Jensen JA. 1988. A fourth new sauropod dinosaur from the Upper Jurassic of the Colorado Plateau and sauropod bipedalism. Western North American Naturalist 48:121–145.
Kirkland JI, Armstrong HJ. 1992. Taphonomy of the Mygatt-Moore Quarry, middle Brushy Basin Member, Morrison Formation (Upper Jurassic) western Colorado. Journal of Vertebrate Paleontology 12:40A.
Maidment SCR, Muxworthy A. 2019. A chronostratigraphic framework for the Upper Jurassic Morrison Formation, western U.S.A. Journal of Sedimentary Research 89:1017–1038. DOI: 10.2110/jsr.2019.54.
Malafaia E, Mocho P, Escaso F, Ortega F. 2017. New data on the anatomy of Torvosaurus and other remains of megalosauroid (Dinosauria, Theropoda) from the Upper Jurassic of Portugal. Journal of Iberian Geology 43:33–59. DOI: 10.1007/s41513-017-0003-9.
Marsh OC. 1896. The dinosaurs of North America. US Geological Survey Annual Report 16:143–244.
Mateus O. 2003. Dinossauros portugueses. Cais 79:unpaginated.
McIntosh JS, Miles CA, Cloward KA, Parker JR. 1996a. A new nearly complete skeleton of Camarasaurus. Bulletin of the Gunma Museum of Natural History 1:1–87.
McIntosh JS, Miller WE, Stadtman KL, Gillette DD. 1996b. The osteology of Camarasaurus lewisi (Jensen, 1988). Brigham Young University Geology Studies 41:73–116.
Mook CC. 1917. Criteria for the determination of species in the Sauropoda, with description of a new species of Apatosaurus. Bulletin of the American Museum of Natural History 37:355–360.
Myers TS, Storrs GW. 2007. Taphonomy of the Mother’s Day Quarry, Upper Jurassic Morrison Formation, south-central Montana, USA. Palaios 22:651.
Osborn HF. 1898. Additional characters of the great herbivorous dinosaur Camarasaurus. Bulletin of the American Museum of Natural History 10:219–233.
Otero A, Carballido JL, Moreno AP. 2020. The appendicular osteology of Patagotitan mayorum (Dinosauria, Sauropoda). Journal of Vertebrate Paleontology 40:e1793158. DOI: 10.1080/02724634.2020.1793158.
Smith JB. 2005. Heterodonty in Tyrannosaurus rex: implications for the taxonomic and systematic utility of theropod dentitions. Journal of Vertebrate Paleontology 25:865–887.
Smith JB, Vann DR, Dodson P. 2005. Dental morphology and variation in theropod dinosaurs: implications for the taxonomic identification of isolated teeth. The Anatomical Record Part A: Discoveries in Molecular, Cellular, and Evolutionary Biology 285:699–736.
Storrs GW, Oser SE, Aull M. 2013. Further analysis of a Late Jurassic dinosaur bone-bed from the Morrison Formation of Montana, USA, with a computed three-dimensional reconstruction. Earth and Environmental Science Transactions of the Royal Society of Edinburgh 103:443–458. DOI: 10.1017/S1755691013000248.
Tschopp E, Maidment SCR, Lamanna MC, Norell MA. 2019. Reassessment of a historical collection of sauropod dinosaurs from the northern Morrison Formation of Wyoming, with implications for sauropod biogeography. Bulletin of the American Museum of Natural History 2019:1–79. DOI: 10.1206/0003-0090.437.1.1.
Tschopp E, Mateus O. 2013. The skull and neck of a new flagellicaudatan sauropod from the Morrison Formation and its implication for the evolution and ontogeny of diplodocid dinosaurs. Journal of Systematic Palaeontology 11:853–888. DOI: 10.1080/14772019.2012.746589.
Tschopp E, Mateus O. 2017. Osteology of Galeamopus pabsti sp. nov. (Sauropoda: Diplodocidae), with implications for neurocentral closure timing, and the cervico-dorsal transition in diplodocids. PeerJ 5:e3179. DOI: 10.7717/peerj.3179.
Tschopp E, Mateus O, Benson RBJ. 2015. A specimen-level phylogenetic analysis and taxonomic revision of Diplodocidae (Dinosauria, Sauropoda). PeerJ 3:e857. DOI: 10.7717/peerj.857.
Tschopp E, Mateus O, Kosma R, Sander PM, Joger U, Wings O. 2014. A specimen-level cladistic analysis of Camarasaurus and a revision of camarasaurid taxonomy. Journal of Vertebrate Paleontology, Program and Abstracts 34:241.
Turner CE, Peterson F. 1999. Biostratigraphy of dinosaurs in the Upper Jurassic Morrison Formation of the Western Interior, USA. In: Gillette DD ed. Vertebrate Paleontology in Utah. Utah Geological Survey Miscellaneous Publication. Salt Lake City, Utah, USA: Utah Geological Survey, 77–114.
Upchurch P, Tomida Y, Barrett PM. 2004. A new specimen of Apatosaurus ajax (Sauropoda: Diplodocidae) from the Morrison Formation (Upper Jurassic) of Wyoming, USA. National Science Museum Monographs 26:1–118.
Wilhite R. 2003. Biomechanical reconstruction of the appendicular skeleton in three North American Jurassic sauropods. Ph. D. dissertation Thesis. Baton Rouge, Louisiana, USA: Louisiana State University.

## Sheet: b Data table
Specimen number	Taxon as used for this study	Taxonomic reference	Alternative taxonomy	Reference for alternative taxonomy	Subfamily	Family	"Superfamily"	content of entire specimen	Location of bite trace	comments	locality	County, State	Stratigraphy	Lithology	References locality
AMNH FARB 92	Diplodocoidea indet.	E. Tschopp, pers. obs. 2018	Sauropoda indet.	AMNH FARB database	NA	NA	Diplodocoidea	metacarpal	Metacarpal		Bone Cabin Quarry	Albany County, Wyoming	Systems Tract C6	channel sandstone	Foster 2003; Maidment and Muxworthy 2019
AMNH FARB 222	Apatosaurinae indet.	E. Tschopp, pers. obs. 2023	Apatosaurus sp.	Upchurch et al. 2004	Apatosaurinae	Diplodocidae	Diplodocoidea	2 frag. cervical vertebrae; dorsal vertebrae 6, 8-10; 3-4 dorsal ribs; 3 sacral vertebrae; caudal vertebrae 1, 2, 5, 8, 9, 12-14, 16, 17, 20-24, 27, 28, 30, 31, 36, 40; 12 chevrons; R scapula; R coracoid; L ilium; ischia; pubes; femora; L tibia; L astragalus	several caudal vertebrae, left femur, left ilium, left astragalus		AMNH FARB 222 Quarry, Como Bluff	Albany County, Wyoming	unknown	claystone	Foster 2003
AMNH FARB 259	Diplodocoidea indet.	E. Tschopp, pers. obs. 2023	Apatosaurus sp.	AMNH FARB database	NA	NA	Diplodocoidea	R calcaneum, R astragalus; L astragalus	right astragalus		Bone Cabin Quarry	Albany County, Wyoming	Systems Tract C6	channel sandstone	Foster 2003; Maidment and Muxworthy 2019
AMNH FARB 264	Neosauropoda indet.	E. Tschopp, pers. obs. 2018			NA	NA	NA	Phalanx (probably pedal, digit II or III)	Phalanx		Bone Cabin Quarry	Albany County, Wyoming	Systems Tract C6	channel sandstone	Foster 2003; Maidment and Muxworthy 2019
AMNH FARB 332	Camarasaurus	Wilhite 2003	Diplodocus	Otero et al. 2020	NA	Camarasauridae	Macronaria	Scapula L and coracoid L, coossified; humeri; ulnae; radii R & L; 2 carpals, metacarpals I, II, III, IV, V; phalanges I-1, II-3, III-1, IV-1, V-1	Metacarpal		Bone Cabin Quarry	Albany County, Wyoming	Systems Tract C6	channel sandstone	Foster 2003; Maidment and Muxworthy 2019
AMNH FARB 366	Eusauropoda indet.	E. Tschopp, pers. obs. 2023	Sauropodomorpha	AMNH FARB database	NA	NA	NA	Left ilium	left ilium		Bone Cabin Quarry	Albany County, Wyoming	Systems Tract C6	channel sandstone	Foster 2003; Maidment and Muxworthy 2019
AMNH FARB 392	Diplodocoidea indet.	E. Tschopp, pers. obs. 2023	Apatosaurus sp.	AMNH FARB database	NA	NA	Diplodocoidea	9 metapodials & 2 phalanges.	2 metacarpals		Bone Cabin Quarry	Albany County, Wyoming	Systems Tract C6	channel sandstone	Foster 2003; Maidment and Muxworthy 2019
AMNH FARB 407	Camarasaurus	AMNH FARB database			NA	Camarasauridae	Macronaria	Tibia fibula & astragalus rt. 6 metapodials (whereof a right metatarsal I) dist. end of 7th 11 phalanges	Right metatarsal I		Bone Cabin Quarry	Albany County, Wyoming	Systems Tract C6	channel sandstone	Foster 2003; Maidment and Muxworthy 2019
AMNH FARB 550	Apatosaurus sp.	Upchurch et al. 2004			Apatosaurinae	Diplodocidae	Diplodocoidea	cervical, dorsal vertebrae and ribs	2 dorsal neural spines		AMNH FARB 550 Quarry, Como Bluff	Albany County, Wyoming	unknown	claystone	Foster 2003
AMNH FARB 582	Camarasaurus	Wilhite 2003			NA	Camarasauridae	Macronaria	fibula	Fibula		Bone Cabin Quarry	Albany County, Wyoming	Systems Tract C6	channel sandstone	Foster 2003; Maidment and Muxworthy 2019
AMNH FARB 597	Diplodocoidea indet.	E. Tschopp, pers. obs. 2023	Diplodocus	AMNH FARB database	NA	NA	Diplodocoidea	metacarpal, manual phalanges, pollex claw	Manual phalanx		Bone Cabin Quarry	Albany County, Wyoming	Systems Tract C6	channel sandstone	Foster 2003; Maidment and Muxworthy 2019
AMNH FARB 625	Sauropoda indet.	E. Tschopp, pers. obs. 2023	Camarasaurus	AMNH FARB database	NA	NA	NA	dorsal ribs, chevrons	Rib fragments		near Sturgis	Meade County, South Dakota	unknown	unknown	AMNH FARB database
AMNH FARB 642	Diplodocinae indet.	E. Tschopp, pers. obs. 2023	Sauropoda	AMNH FARB database	Diplodocinae	Diplodocidae	Diplodocoidea	Femur R	Femur		Bone Cabin Quarry	Albany County, Wyoming	Systems Tract C6	channel sandstone	Foster 2003; Maidment and Muxworthy 2019
AMNH FARB 660	Diplodocinae indet.	E. Tschopp, pers. obs. 2023	Sauropoda	AMNH FARB database	Diplodocinae	Diplodocidae	Diplodocoidea	Scapula R	Right scapula		Bone Cabin Quarry	Albany County, Wyoming	Systems Tract C6	channel sandstone	Foster 2003; Maidment and Muxworthy 2019
AMNH FARB 664	Camarasaurus	Wilhite 2003			NA	Camarasauridae	Macronaria	scapulacoracoid L, humerus L, ulna radius; metacarpals I -V 2 phalanges 2 carpals & 2	Left metacarpal I, II, III, IV, V (only IV and V bear tooth traces)		Bone Cabin Quarry	Albany County, Wyoming	Systems Tract C6	channel sandstone	Foster 2003; Maidment and Muxworthy 2019
AMNH FARB 675	Macronaria indet.	Tschopp et al. 2015	"Apatosaurus" minimus	Mook 1917	NA	NA	Macronaria	Sacrum, Ilia, L+R pubes, L ischium	pubis	holotype specimen	Bone Cabin Quarry	Albany County, Wyoming	Systems Tract C6	channel sandstone	Foster 2003; Maidment and Muxworthy 2019
AMNH FARB 5755	Apatosaurinae indet.	E. Tschopp, pers. obs. 2023	Apatosaurus	AMNH FARB database	Apatosaurinae	Diplodocidae	Diplodocoidea	caudal vertebrae, scapula L, tibia, fibula, box of fragments, girdle fragment (likely a coracoid, ET, pers. obs. 2022)	Girdle fragment (probably a coracoid)		Como Bluff Cope Quarry 5	Albany or Carbon County, Wyoming	unknown	unknown	Foster 2003
AMNH FARB 5760	Camarasaurus supremus	Cope 1877			NA	Camarasauridae	Macronaria	2 CV, 18 DV; 55 caudals; > 17 DR, 8 Ch, sc R, co R, il L, pu R & L, 2 is L, 2 is R, fe L, tb L & R, fi R, neural spine fragment	Neural spine fragment, middle caudal vertebra, anterior caudal vertebra, posterior dorsal vertebra, right scapula	topotype specimen	Cope Quarry 1; Garden Park, Canyon City	Fremont County, Colorado	Systems Tract C5	mudstone	Carpenter 2019; Maidment and Muxworthy 2019
AMNH FARB 5761	Camarasaurus supremus	Cope 1877			NA	Camarasauridae	Macronaria	maxilla L, quadrate R, pterygoid R, parietal L, braincase, 2 dentaries (both R), cervical vertebrae, dorsal vertebrae, sacrum, caudal vertebrae, dorsal ribs, scapulae L+R, coracoid L, humerus L, ilium, ischium L, fibula	Posterior caudal vertebra	topotype specimen	Cope Quarry VIII; Garden Park, Canyon City	Fremont County, Colorado	Systems Tract C5	mudstone	Carpenter 2019; Maidment and Muxworthy 2019
AMNH FARB 6113	Diplodocidae indet.	E. Tschopp, pers. obs. 2023 (based on AMNH FARB 6114, which may belong to same individual)	Sauropoda indet.	AMNH FARB database	NA	Diplodocidae	Diplodocoidea	Ulna radius & 5 metapodials 3 phalanges (whereof a manual phalanx) 1 claw & 1 carpal bone	Manual phalanx		Bone Cabin Quarry	Albany County, Wyoming	Systems Tract C6	channel sandstone	Foster 2003; Maidment and Muxworthy 2019
AMNH FARB 6118	Galeamopus pabsti	E. Tschopp, pers. obs. 2023 (based on AMNH FARB 6114, which may belong to same individual)	Sauropoda indet.	AMNH FARB database	Diplodocinae	Diplodocidae	Diplodocoidea	Astragalus, phalanx	Astragalus, phalanx		Bone Cabin Quarry	Albany County, Wyoming	Systems Tract C6	channel sandstone	Foster 2003; Maidment and Muxworthy 2019
AMNH FARB 30066	Eusauropoda indet.	E. Tschopp, pers. obs. 2023	Sauropoda indet.	AMNH FARB database	NA	NA	NA	Carpal	Carpal		Bone Cabin Quarry	Albany County, Wyoming	Systems Tract C6	channel sandstone	Foster 2003; Maidment and Muxworthy 2019
AMNH FARB 30116	Sauropoda indet.	AMNH FARB database			NA	NA	NA	Metapodial (probably a metatarsal, E. Tschopp, pers. obs. 2023)	Metapodial (probably a metatarsal, E. Tschopp, pers. obs. 2023)		Near Reed's Quarry No. 13; Como Bluff	Albany or Carbon County, Wyoming	unknown	unknown	AMNH FARB database
AMNH FARB 30165	Eusauropoda indet.	E. Tschopp, pers. obs. 2023	Saurischia indet.	AMNH FARB database	NA	NA	NA	Metatarsal III or IV (most likely a metatarsal III of a macronarian; E. Tschopp, pers. obs. 2023)	metatarsal		Bone Cabin Quarry	Albany County, Wyoming	Systems Tract C6	channel sandstone	Foster 2003; Maidment and Muxworthy 2019
AMNH FARB 30192	Sauropoda indet.	AMNH FARB database			NA	NA	NA	Metapodial (probably a partial metatarsal I or II, or a metacarpal I; E. Tschopp, pers. obs. 2023)	Metapodial		Bone Cabin Quarry	Albany County, Wyoming	Systems Tract C6	channel sandstone	Foster 2003; Maidment and Muxworthy 2019
AMNH FARB 30199	Macronaria indet.	E. Tschopp, pers. obs. 2023	Saurischia indet.	AMNH FARB database	NA	NA	Macronaria	metacarpal III	metacarpal		Bone Cabin Quarry	Albany County, Wyoming	Systems Tract C6	channel sandstone	Foster 2003; Maidment and Muxworthy 2019
ANS 21122	Suuwassea emilieae	Harris & Dodson 2004			NA	Dicraeosauridae	Diplodocoidea	braincase, premaxilla, maxilla, dentary, cervical, dorsal, caudal vertebrae, ribs, clavicles, interclavicle, upper right foreleg, scapula, humerus R, lower right hindleg, partial femur	3 metatarsals and phalanx	holotype specimen	Suuwassea Quarry	Carbon County, Montana	"?Brushy Basin member equivalent"	unknown	Harris & Dodson 2004
BYU 9047 (wrongly cited as 9740 in Jensen 1988)	Camarasaurus lewisi	McIntosh et al. 1996	Cathetosaurus lewisi	Jensen 1988	NA	Camarasauridae	Macronaria	articulated sauropod skeleton including: atlas/axis plus 12 cervical vertebrae with ribs; right humerus, radius, ulna, and partial manus; 12 dorsal vertebrae, 1 dorsosacral vertebra; 20 dorsal ribs; 4 sacral vertebrae, and ribs co-ossitied with 1 ilium; 1 pubis; both ischia; 43 anterior caudal vertebrae with many articulated chevrons.	pelvis	holotype specimen	Dominguez-Jones Quarry	Mesa County, Colorado	Brushy Basin Member	claystone	Foster 2003
CM 11393	Camarasaurus grandis	Tschopp et al. 2014			NA	Camarasauridae	Macronaria	2 mid-cervical vertebrae, some anterior-mid dorsal vertebrae, forelimb R, femur R, fibula L, scapulocoracoid R, pubis, ischium, ilium, some limb elements	caudal vertebra		Carnegie Quarry, Dinosaur National Monument	Uintah County, Utah	Systems Tract B4	channel sandstone	Foster 2003; Maidment and Muxworthy 2019
CMC VP7747	Diplodocinae indet.	E. Tschopp, pers. obs. 2017	Diplodocus sp.	Storrs et al. 2013	Diplodocinae	Diplodocidae	Diplodocoidea	Femur	Femur		Mother's Day Quarry	Carbon County, Montana	lower half of the Upper Jurassic Morrison Formation, approximately 12 m above the underlying Swift Formation	sandstone	Turner and Peterson 1999
DINO 5119	Diplodocoidea indet.	Hone & Chure 2018			NA	NA	Diplodocoidea	femur R	femur		Carnegie Quarry, Dinosaur National Monument	Uintah County, Utah	Systems Tract B4	channel sandstone	Foster 2003; Maidment and Muxworthy 2019
GMNH-PV 101	Camarasaurus sp.	Tschopp et al. 2014	Camarasaurus grandis	McIntosh et al. 1996	NA	Camarasauridae	Macronaria	skull (premaxillae, maxilla, dentary, teeth, braincase ...), atlas, sternal plates, fore-/hindlimb, humerus L, manus,	Humerus, sacrum, right femur ; phalanx right foot		East Camarasaurus Quarry	Albany County, Wyoming	about 14 m above base of member	channel sandstone	McIntosh et al. 1996; Foster 2003
MWC 861	Apatosaurinae indet.	E. Tschopp, pers. obs. 2023	Apatosaurus sp.	Drumheller et al. 2020	Apatosaurinae	Diplodocidae	Diplodocoidea	pubis	Pubis		Mygatt-Moore Quarry	Mesa County, Colorado	Brushy Basin Member; Systems Tract B4	claystone	Kirkland and Armstrong 1992; Foster 2003; Maidment and Muxworthy 2019
MWC 3853	Apatosaurinae indet.	E. Tschopp, pers. obs. 2023	Apatosaurus sp.	Drumheller et al. 2020	Apatosaurinae	Diplodocidae	Diplodocoidea	rib fragment	Rib		Mygatt-Moore Quarry	Mesa County, Colorado	Brushy Basin Member; Systems Tract B4	claystone	Kirkland and Armstrong 1992; Foster 2003; Maidment and Muxworthy 2019
MWC 4011	Apatosaurinae indet.	E. Tschopp, pers. obs. 2023	Apatosaurus sp.	Drumheller et al. 2020	Apatosaurinae	Diplodocidae	Diplodocoidea	ischium	ischium		Mygatt-Moore Quarry	Mesa County, Colorado	Brushy Basin Member; Systems Tract B4	claystone	Kirkland and Armstrong 1992; Foster 2003; Maidment and Muxworthy 2019
TMP 1983.035.0003	Camarasaurus sp.	Ikejiri 2005			NA	Camarasauridae	Macronaria	sacrum, ilium	ilium	original number UUVP 5309	Cleveland-Lloyd Quarry	Emery County, Utah	Brushy Basin Member; Systems Tract B4	claystone	Foster 2003; Maidment and Muxworthy 2019
NMZ 1000004	Kaatedocus siberi	Tschopp & Mateus 2013			Diplodocinae	Diplodocidae	Diplodocoidea	skull, CV 1, 3-14	cervical rib 11	original number SMA 0004; holotype specimen	Howe Quarry	Bighorn County, Wyoming	Systems Tract C5	claystone	Foster 2003; Maidment and Muxworthy 2019
NMZ 1000011	Galeamopus pabsti	Tschopp & Mateus 2017			Diplodocinae	Diplodocidae	Diplodocoidea	skull, cervical, dorsal vertebrae, ribs, chevrons, pectoral girdles, forelimbs, manus, ilium, ischium, hindlimb, pes	left dorsal rib 2, left scapula	original number SMA 0011; holotype specimen	Howe-Scott Quarry	Bighorn County, Wyoming	Systems Tract C5	sandstone	Tschopp and Mateus 2017; Maidment and Muxworthy 2019
WDC GB	Galeamopus sp.	Tschopp et al. 2019			Diplodocinae	Diplodocidae	Diplodocoidea	cervical, dorsal, sacral, and caudal vertebrae, dorsal ribs, sternal ribs, hindlimb	metacarpal I, left; pubis, right		near Bridger	Carbon County, Montana	unknown	unknown	WDC database
YPM VP.001908	Camarasaurus grandis	Ikejiri 2005	"Pleurocoelus montanus"	Marsh 1896	NA	Camarasauridae	Macronaria	cervical neural arches, ant dorsal vertebra; dorsal centrum; ant dorsal centrum; ant caudal centrum; distal end R humerus; L femur; frag R femur;	Femur	holotype specimen	Reed's Quarry 1, Como Bluff	Albany County, Wyoming	Systems Tract C6	claystone	Foster 2003; Maidment and Muxworthy 2019
