# Supplementary material for: Bite and tooth marks on sauropod dinosaurs from the Morrison Formation
Source: PeerJ. 2023 Nov 14;11:e16327. doi: 10.7717/peerj.16327 (PMC10655710; doi:10.7717/peerj.16327)
Supplement: Supplemental Information 2 — All the raw measurements of of the catalogues bite traces and their categorisation and documentation. [file peerj-11-16327-s002.xlsx]

## Sheet: Sheet1
Morrison sauropods with bite marks
Specimen	Taxon	Type of marks (Binford, 1981; D'Amore & Blumenschine, 2009)	possible striations	Type of marks (Hone & Watabe, 2010)	Location	Reference	Photos	3D scans	Measured by	Source	Remarks
AMNH FARB 92	Diplodocoidea indet.	scores and furrows		drag, bite and drag	Metacarpal	RL, pers. obs. 2018	Yes		photo	R. Lei
AMNH FARB 222	Apatosaurinae indet.	scores, furrows and edge trace	no	drag, bite and drag	8 caudals, femur, ilium, astragalus	Osborn 1898, Hunt et al., 1994; RL and ET, pers. obs. 2018	Yes, in ref		photo and caliper	R. Lei	Osborn (and Hunt et al.) only reported in caudals
AMNH FARB 259	Diplodocoidea indet.	furrows	yes	bite and drag	Astragalus	RL, pers. obs. 2019		Yes	scan	R. Lei
AMNH FARB 264	Neosauropoda indet.	scores and furrows	yes (mark A)	drag, bite and drag	Phalanx	RL, pers. obs. 2018		Yes	scan	R. Lei
AMNH FARB 332	Camarasaurus sp.	fracture		removed	Metacarpal	RL, pers. obs. 2018	Yes		photo	R. Lei
AMNH FARB 366	Eusauropoda indet.	furrows and scores, fracture	no	drag, bite and drag, removed	left ilium	RL, pers. obs. 2018; ET, pers. obs. 2020	Yes		photo and caliper	R. Lei, E. Tschopp
AMNH FARB 392	Diplodocoidea indet.	furrows, fracture	no	bite and drag, removed	2 metacarpals	RL, pers. obs. 2018		Yes	scan	R. Lei
AMNH FARB 407	Camarasaurus sp.	scores		drag	Right metatarsal I	RL, pers. obs. 2018		Yes	scan	R. Lei
AMNH FARB 550	Apatosaurus sp.	fracture	yes	removed	2 dorsal neural spines	ET, pers. obs. 2018	yes (element in BigBoneRoom)		photo	E. Tschopp	half of distal part of neural spines bitten off
AMNH FARB 582	Camarasaurus sp.	fracture		removed	Fibula	RL, pers. obs. 2018		Yes	scan	R. Lei
AMNH FARB 597	Diplodocoidea indet.	scores		drag	Manual phalanx	RL, pers. obs. 2018	Yes		photo	R. Lei
AMNH FARB 625	Sauropoda indet.	score and furrows		drag, bite and drag	3 Rib fragments	RL, pers. obs. 2018	Yes	Yes	photo and scan	R. Lei
AMNH FARB 642	Diplodocinae indet.	fracture		removed	Femur	RL, pers. obs. 2018		Yes	scan	R. Lei
AMNH FARB 660	Diplodocinae indet.	scores		drag	Right scapula	RL, pers. obs. 2018		Yes	scan	R. Lei
AMNH FARB 664	Camarasaurus sp.	scores		drag	Left metacarpal IV, V	RL, pers. obs. 2018		Yes	scan	R. Lei	only IV and V bear tooth traces
AMNH FARB 675	Macronaria indet.	scores		drag	pubis	RL, pers. obs. 2018		Yes	scan	R. Lei
AMNH FARB 5755	Apatosaurinae indet.	furrows		bite and drag	pectoral girdle fragment (probably a coracoid)	RL, pers. obs. 2018		Yes	scan	R. Lei
AMNH FARB 5760	Camarasaurus supremus	scores, furrows, pit, puncture	yes (dorsal D-x-128, mark A)	drag, bite and drag, pit, puncture	Neural spine fragment, middle caudal vertebra, anterior caudal vertebra, posterior dorsal vertebra, right scapula	RL and ET, pers. obs. 2018	Yes		photo and caliper	R. Lei	NSF (score and vascular groove), MCV (pit), Cd-y-4 (puncture), D-x-128 (scores), Sc-3 (scores, furrows)
AMNH FARB 5761	Camarasaurus supremus	edge traces		bite and drag	Posterior caudal vertebra	RL, pers. obs. 2018	Yes		photo	R. Lei
AMNH FARB 6113	Diplodocidae indet.	score		drag	Manual phalanx	RL, pers. obs. 2018	Yes		photo	R. Lei
AMNH FARB 6118	Galeamopus pabsti	score and pits		drag, pits	Astragalus, phalanx	RL, pers. obs. 2018		Yes	scan	R. Lei
AMNH FARB 30066	Eusauropoda indet.	scores		drag	Carpal	RL, pers. obs. 2018	Yes		photo	R. Lei	identified two elements which may represent vascular grooves or damage related to trampling
AMNH FARB 30116	Sauropoda indet.	Puncture		puncture	Metapodial	RL, pers. obs. 2018		Yes	scan	R. Lei
AMNH FARB 30165	Eusauropoda indet.	furrow	no	bite and drag	metatarsal	ET and RL, pers. obs. 2022		yes	scan	R. Lei, E. Tschopp	single furrow on distal articular surface
AMNH FARB 30192	Sauropoda indet.	Puncture		puncture	Metapodial	RL, pers. obs. 2018		Yes	scan	R. Lei
AMNH FARB 30199	Macronaria indet.	furrows	no	bite and drag	metacarpal	ET and RL, pers. obs. 2022		yes	scan	R. Lei, E. Tschopp	associated with distal articular surface
ANS 21122	Suuwassea emilieae	deep parallel scores, "Most of the marks are deep, mostly parallel grooves" (Harris, 2007)	yes (on the posterior surface of metatarsal I)	drag, bite and drag	3 metatarsals and phalanx	Harris 2007	in ref
BYU 9047	Camarasaurus lewisi	big tooth traces and smaller ones (2 taxa?), scores? "Deep teeth marks" (Jenens, 1988)		removed	ilium	Jensen 1988, Hunt et al., 1994	in ref
CM 11393	Camarasaurus grandis	single "punch mark"	no	bite and drag	caudal vertebral centrum	ET, pers. obs. 2014	Yes			E. Tschopp
CMC VP7747	Diplodocinae indet.	bite traces			Femur	Myers & Storrs, 2007; Storrs et al. 2013
DINO 5119	Diplodocoidea indet.	scores		drag	femur	Hone & Chure 2018	Yes, in ref			D. Hone?	fragmentation of cortex at the dorsal edge which may have been produced by erosion
GMNH-PV 101	Camarasaurus sp.	fracture, scores, furrows and piece missing		removed, drag, bite and drag	Humerus, sacrum, right femur ; phalanx right foot	McIntosh et al. 1996					Humerus (fracture); sacrum (furrows?); right femur (score? furrow?); phalanx right foot (furrows)
MWC 861	Apatosaurinae indet.	furrows		bite and drag	pubis	Foster et al., 2018; Drumheller et al., 2020	yes				Others mentioned but not identified or described; not all traces clearly visible in Drumheller et al., 2020
MWC 3853	Apatosaurinae indet.	score		drag	rib	Drumheller et al., 2020	yes
MWC 4011	Apatosaurinae indet.	furrows		bite and drag	ischium	Foster et al., 2018; this study	Yes, in ref			M. Wedel	Apparently there’s both this ischium and a pubis (See here: https://svpow.com/2018/05/17/in-quest-of-monsters-last-weeks-utah-adventure/)
TMP 1983.035.0003	Camarasaurus sp.	scrapes and piece missing		drag, bite and drag	ilium	DH pers obs 2017	Yes			D. Hone
SMA 0004	Kaatedocus siberi	2 parallel scratches	no	drag	cervical rib 11	Tschopp & Mateus 2013	Yes, in ref			E. Tschopp
SMA 0011	Galeamopus pabsti	scores (ldr2) + grooves		drag (ldr2) + "grooves"	left dorsal rib 2, left scapula	Tschopp & Mateus 2017	Yes, in ref			E. Tschopp	LDR2 (scores)
UUVP 5309 (same as TMP specimen above)		several parallel furrows, scores		drag, bite and drag	ilium	Chure et al. 1998	in ref
WDC GB		2 scrapes			metacarpal I, left	ET, pers. obs. 2018	Yes			E. Tschopp	along rim of proximal articular surface
WDC GB	Galeamopus sp.	fracture	no	removed	pubis, right	ET, pers. obs. 2018	Yes			E. Tschopp	iliac peduncle/ambiens process and distal end
YPM VP.001908	Camarasaurus grandis	scores, furrows	yes	drag, bite and drag	femur	ET, pers. obs. 2020	yes			E. Tschopp	several scores on posteromedial edge of lower femoral shaft; small, likely juvenile animal
