# Supplementary material for: Bite and tooth marks on sauropod dinosaurs from the Morrison Formation
Source: PeerJ. 2023 Nov 14;11:e16327. doi: 10.7717/peerj.16327 (PMC10655710; doi:10.7717/peerj.16327)
Supplement: Supplemental Information 3 — Specific catalogue of the systematic survey of the American Museum of Natural History collection of Morrison Sauropods [file peerj-11-16327-s003.xlsx]

## Sheet: Sheet1
	Length	Width	Depth	Spacing	BA Length	BA Width
	Mean	Mean	Mean	Mean	Mean	Mean			BA: Bite Area		Unit of measurement: mm
AMNH FARB 92
A	43.46	4.23
B	22.84	6.34
C	7.17	5.46
D	30.22	5.08
E	13.92	2.49
F	20.82	8.11
G	12.29	4.58
H	19.02	7.31
C-D				8.43	30.22	13.15
F-H				10.81	20.82	18.03
AMNH FARB 222
1
A	26.95	6.83
B	60.95	8.17
C	30.95	7.9
D	42.62	6.57
E	43.94	5.04
F	18.78	3.68
G	51.62	10.97
H	30.21	29.33
B-C				11.44
C-D				12.43
B-C-D					75.12	39.69
E-F				6.97	43.94	16.22
2
A	46.35	20.82
3
A	33.45	7.83
B	36.83	13.29
C	57.55	18.43
A-B				22.06
B-C				26.27
A-B-C					57.55	60.36
4
Area 1
A	28.55	25.85
B	15.91	14.39
A-B				31.16	28.55	52.23
Area 2
A	39.69	19.65
B	26.51	6.58
C	66.29	8.05
D	40.63	10.17
E	26.31	10.18
F	34.25	12.07
A-B				20.66
B-C				13.66
A-B-C					78.41	58.01
E-F				35.87	34.25	50.45
5
A	16.9	6.51
B	30.17	6.62
A-B				20.55	30.17	54.14
6
A	34.28	18.91
B	29.05	9.41
C	33.28	16.07
D	18.26	5.49
B-C				16.19
B-D				13.21
B-C-D					31.48	37.87
7
A	28.49	19.04
8
A	15.54	4.95
B	15.43	2.64
9
Area 1
A	119.15	23.62
B	120.39	24.92
C	128.11	27.78
A-B				24.51
B-C				36.56
A-B-C					128.11	84.77
Area 2
A	49.24	20.98
B	64.92	22.02
C	64.54	26.39
D	40.95	10.37
E	60.94	8.81
F	42.43	6.85
B-C				47.35	64.92	69.1
Area 3
A	107.09	11.87
B	142.25	18.27
C	133.24	22.29
D	125.47	15.14
E	133.71	12.7
F	112.31	14.83
A-B				32.54
B-C				28.3
C-D				34.53
D-E				22.65
E-F				34.83
A-B-C-D-E-F					153.44	168.56
10
A	26.14	7.16
B	48.51	16.86
C	31.62	8.62
A-B				20.33
B-C				14.94
A-B-C					48.51	46.99
11
A	52.8	9.12
B	121.62	10.63
C	84.54	20.52
D	34.16	20.22
E	71.91	7.95
A-B				19.95
B-C				41.44
A-B-C					128.56	77.51
AMNH FARB 259
A	19.37	6.06	3.57
AMNH FARB 264
A	56.48	24.76	10.23
B	55.78	14.53	9.48
C	21.79	14.28	3.97
D	13.87	5.35	3.03
E	23.55	5.78	4.01
F	30.82	10.24	2.71
G	20.5	4.92	2.09
D-E				10.03
E-F				13.75
D-E-F					39.41	29.03
AMNH FARB 332
A	48.22	38.53	19.95
AMNH FARB 366
Area 1
A					302.67	82.67
Area 2
A	11.24	3.06	1.32
B	16.84	3.03	1.55
C	36.67	3.07	1.28
A-B				15.83	27.22	19.04
Area 3
A	45	6.3	7.09
B	54.18	6.85	7.56
A-B				36.36	208.67	136
Area 4
A	16.19	2.66	2.15
B	23.33	2.49	2.12
C	34.57	3.4	2.37
D	22.97	2.38	1.49
E	18.15	2.48	3.12
A-B				7.51	22.78	14.22
C-D				14.66	31.38	19.53
Area 5
o-A	55.17
o-B	39.75
o-C	38.57
o-D	30.35
o-E	33.34
o-F	28.9
p-A	33.1
p-B	32.54
p-C	29.38
p-D	27.77
p-E	23.81
p-F	22.44
p-G	15.18
p-H	19.87
p-I	8.67
p-J	25.58
p-K	23.69
p-L	30.78
oA-oB				31.72
oB-oC				10.86
oC-oD				9.88
oD-oE				13.12
oE-oF				9.13
oA-oB-oC-oD-oE-oF					37.82	89.68
pA-pB				15.65
pB-pC				9.53
pC-pD				15.25
pD-pE				25.36
pE-pF				24.96
pF-pG				10.99
pG-pH				9.8
pH-pI				8.7
pI-pJ				26.9
pJ-pK				14.62
pK-pL				19.48
pA-pB-pC-pD-pE-pF-pG-pH-pI-pJ-pK-pL					34.04	171.4
Area 6.1
A	21.31	2.3	0.77
B	13.48	2.7	0.96
C	26.31	2.88	1.08
D	16.39	2.76	0.98
E	22.33	3.12	0.97
A-B				8.43
B-C				7.09
C-E				14.84
A-B-C-E					21.43	31.9
Area 6.2
A	24.97	2.42	0.98
B	21.36	3.4	1.01
C	18.41	2.93	0.78
D	20.81	2.77	0.71
E	14.61	3.23	0.98
F	23.62	12.07	6.22
A-B				7.48
B-C				7.16
D-E				5.23	25.58	8.83
A-B-C					32.15	16.87
Area 7
A	10.65	0.97	0.27
B	27.41	2.16	1.95
C	9.06	0.89	0.53
D	13.66	0.63	0.29
E	20.36	1.13	1.03
F	29.37	2.29	0.9
G	14.65	2.07	0.81
A-B				14.93
B-C				10.07
C-D				8.46
D-E				6.65
E-F				16.77
F-G				9.81
A-B-C-D-E-F-G					76.23	74.57
Area 8
A					202.33	86.29
AMNH FARB 392
1
A	46.09	18.99	20.7
B	43.11	8.89	2.79
C	24.95	8.12	2.32
D	35.39	9.58	3.67
E	19.2	7.58	3.98
F	17.51	4.2	2.79
G	32.02	6.59	3.23
H	16.67	4.34	2.24
2
A	44.87	6.61	3.2
AMNH FARB 407
A	23.98	4.77	2.1
B	61.09	5.37	1.97
C	55.17	9.14	3.74
A-B				5.99
B-C				9.28
A-B-C					61.09	21.21
AMNH FARB 550
1
A	88.09	105.19
AMNH FARB 582
A	54.72	34.06	4.57
AMNH FARB 597
A	32.48	14.1
B	18.68	9.17
A-B				14.95	30.91	27.85
AMNH FARB 625
1
A	32.33	4.07	1.84
2
A	12.93	2.3
B	16.09	3.31
C	14.82	3.05
A-B				3.31
B-C				3.89
A-B-C					17.15	10.59
3
A	15.77	2.29	0.36
AMNH FARB 642
A	35.93	20.86	15.8
AMNH FARB 660
A	42.28	1.89	0.59
B	43.2	1.4	0.33
A-B				8.24	57.77	9.94
AMNH FARB 664
IV
A	55.33	3.62	1.38
B	22.85	2.82	1.45
A-B				6.06	59.49	8.86
V
A	31.22	3.6	1.14
AMNH FARB 675
A	40.21	2.34	0.62
B	40.97	3.77	1.11
C	24.1	2.32	1.05
A-B				10.13
B-C				16.58
A-B-C					40.21	39.62
AMNH FARB 5755
A	36.19	17.56	6.5
B	46.69	9.85	3.45
A-B				31.51	46.69	49.53
AMNH FARB 5760
NSF
A	38.59	4.6	3.24
MCV
A	17.18	13.93	4.24
Cd-y-4
A	28.21	6.54	3.04
D-x-128
A	28.76	9.11
B	59.06	5.95
C	73.14	10.01
D	75.78	15.27
E	53	11.95
F	54.37	7.72
B-C				12.76
C-D				19.18
D-E				12.32
E-F				9.35
B-C-D-E-F					90.43	66.02
Sc-3
A	29.1	4.98
B	35.06	5.23
C	39.93	5.8
D	61.05	14.09
E	46.42	2.77
F	73.35	7.46
G	80.29	2.98
H	20.72	5.44
I	23.03	4.74
J	20.85	3.67
K	59.13	6.25
L	33.42	4.94
M	55.03	8.35
N	20.22	8.33
O	36.43	8.41
P	42.28	6.32
Q	62.26	7.21
R	23.93	4.52
S	26.14	5.87
T	37.74	4.58
U	21.22	5.46
V	36.21	4.95
A-B				21.37
B-C				15.09
C-D				15.33
D-E				14.45
E-F				9.46
F-G				16.37
G-H				6.14
H-I				9.08
K-L				10.74	58.92	18.77
O-P				15.43
P-Q				10.69
Q-R				20.84
R-S				8.8
S-T				31.25
T-U				10.26
A-B-C-D-E-F-G-H-I					84.87	126.56
O-P-Q-R-S-T-U					96.07	121.2
AMNH FARB 5761
A	33.5	29.69	9.44
B	26.18	15.95	13.51
A-B				20.15	33.5	46.93
AMNH FARB 6113
A	14.61	3.2	0.71
AMNH FARB 6118
Astragalus
A	68.8	5.06	4.32
Phalanx
A	4.07	4.85	1.84
B	4.49	4.27	1.89
A-B				4.96	14.55	27.43
AMNH FARB 30066
A	10.33	2.66
B	12.6	2.05
C	19.5	2.51
D	16.39	2.26
E	14.59	3.43
F	13.29	2.82
G	5.96	0.68
H	5.28	0.69
I	6.31	0.99
E-F				12.9	14.23	15.45
G-H				2.52
H-I				2.26
G-H-I					8.94	6.44
AMNH FARB 30116
A	9.74	9.66	4.9
AMNH FARB 30165
A	35.94	10.59	7.13
AMNH FARB 30192
A	34.2	6.69	9.36
AMNH FARB 30199
A	32.45	5.02	2.21
B	15.41	3.26	1.11
C	25.7	5.96	1.71
D	21.75	4.65	2.33
E	14.74	5.02	1.87
F	27.34	4.53	2.43
G	15.55	2.67	0.68
H	15.64	3.95	1.36
I	25.11	5.02	2.38
J	24.87	6.85	2.52
K	20.86	5	4.58
L	34.02	7.73	3.21
M	14.25	3.21	0.98
N	9.24	2.81	0.88
