# Supplementary material for: Bite and tooth marks on sauropod dinosaurs from the Morrison Formation
Source: PeerJ. 2023 Nov 14;11:e16327. doi: 10.7717/peerj.16327 (PMC10655710; doi:10.7717/peerj.16327)
Supplement: Supplemental Information 4 — All the measurements of theropod teeth used to determine the sizes of possible bites by theropods on sauropod bones and all of the raw data and the taxonomic identity of the specimens. [file peerj-11-16327-s004.xlsx]

## Sheet: Morrison Fm theropod teeth
		Taxa (Genus)	Specimen	Position	Species	Source	Formation	Locality	Region	Country	Age	Epoch	Side	Position	CBL	CBW	CH	AL	CBR	CHR	MCL	MCW	MCR	MDE	MEC	CTU	Transv. Undu.	Interdent. sulci	LAF	LIF	MA	MC	MB	DA	DC	DB	MAVG	DAVG	TDD	DSDI	Remarks on crown wear	Mesial Denticle Width	Distal Denticle Width
		Theropod genera	Specimen number in the collection		Theropod species	Source of data	Geological Formation	Locality	Region/State/Province/Departement	Country	Stage	Time	Side of jaw				Crown Heigth		Crown Base Ratio			Mid-Crown Width				Crown Transversal Undulations (per 5 mm)		Description of Interdenticular Sulci		Lingual flutes	Mesio-Apical denticles (per 5 mm)					Distalo-Basal denticles (per 5 mm)				Denticle size difference index
															Crown Base Length										Extension of mesial carina on the crown (in %)				Labial Flutes						Distalo-Central denticles (per 5 mm)				Total of Distal Denticles on the crown
				Position of tooth (pmx, premaxilla; mx, maxilla; dt, dentary)												Crown Base Width				Crown Height Ratio				Mesial Denticles Extension (from the cervix)									Mesio-Basal denticles (per 5 mm)					Distal denticles Average
														Position of tooth (pmx, premaxilla; mx, maxilla; dt, dentary)				Apical Length			Mid-Crown Length						Description of Tranversal/marginal Undulations					Mesio-Central denticles (per 5 mm)					Mesial denticles Average
																							Mid-Crown Ratio											Distalo-Apical denticles (per 5 mm)
1	Ceratosaurus	Ceratosaurus	NMNH 4735	Isolated	nasicornis	C.H. Pers. obs.	Morrisson Formation	Canyon City, Garden Park, Quarry I	Colorado	U.S.	Kimmeridgian-Tithonian	Late Jurassic	/	Isolated	19.3	?	38.2	41.8	?	1.97927	14.2	?	?	0	100	4	?	?	absent	absent	11.66	11	?	13.74	13	16.6	11.33	14.44	110.322	0.846154	tip intact, small wear facet on labial side	0.454545	0.384615
2		Ceratosaurus	NMNH 4735	Lmx2	nasicornis	C.H. Pers. obs.	Morrisson Formation	Canyon City, Garden Park, Quarry I	Colorado	U.S.	Kimmeridgian-Tithonian	Late Jurassic	Left	mx2	24.7	?	51.8	62.5	?	2.09717	18.7	?	?	0?	100?	3	?	?	absent	absent	?	12.5	?	9.16	10.5	10.5	12.5	10.053	104.149	1.19048	missing, unknown	0.4	0.47619
3		Ceratosaurus	NMNH 4735	Lmx4	nasicornis	C.H. Pers. obs.	Morrisson Formation	Canyon City, Garden Park, Quarry I	Colorado	U.S.	Kimmeridgian-Tithonian	Late Jurassic	Left	mx4	?	?	?	?	?	?	?	?	?	?	?	4	?	?	absent	absent	9	12	17.5	9.5	11.66	?	12.83	10.58	?	1.02916	missing, unknown	0.416667	0.428816
4		Ceratosaurus	NMNH 4735	Lmx6, unerupted	nasicornis	C.H. Pers. obs.	Morrisson Formation	Canyon City, Garden Park, Quarry I	Colorado	U.S.	Kimmeridgian-Tithonian	Late Jurassic	Left	mx6, unerupted	27.6	?	63.9	70.9	?	2.31522	22.5	?	?	0	100	0	?	?	absent	absent	11	10	?	11	11	?	10.5	11	140.58	0.909091	tip intact, unerupted	0.5	0.454545
5		Ceratosaurus	NMNH 4735	Lmx8	nasicornis	C.H. Pers. obs.	Morrisson Formation	Canyon City, Garden Park, Quarry I	Colorado	U.S.	Kimmeridgian-Tithonian	Late Jurassic	Left	mx8	21	?	?	?	?	?	?	?	?	?	?	?	?	?	absent	absent	12	?	?	11.25	?	?	12	11.25	?	?	missing, unknown	?	?
6		Ceratosaurus	NMNH 4735	Lmx9	nasicornis	C.H. Pers. obs.	Morrisson Formation	Canyon City, Garden Park, Quarry I	Colorado	U.S.	Kimmeridgian-Tithonian	Late Jurassic	Left	mx9	23.6	?	?	?	?	?	?	?	?	?	?	?	?	?	absent	absent	10.5	?	?	?	10.5	?	10.5	10.5	?	?	missing, unknown	?	0.47619
7		Ceratosaurus	NMNH 4735	Lmx10	nasicornis	C.H. Pers. obs.	Morrisson Formation	Canyon City, Garden Park, Quarry I	Colorado	U.S.	Kimmeridgian-Tithonian	Late Jurassic	Left	mx10	19.4	?	?	?	?	?	?	?	?	?	?	?	?	?	absent	absent	?	?	?	?	12	?	?	12	?	?	missing, unknown	?	0.416667
8		Ceratosaurus	NMNH 4735	Lmx11	nasicornis	C.H. Pers. obs.	Morrisson Formation	Canyon City, Garden Park, Quarry I	Colorado	U.S.	Kimmeridgian-Tithonian	Late Jurassic	Left	mx11	16.2	?	?	?	?	?	?	?	?	?	?	?	?	?	absent	absent	13.125	11	?	13.75	12.5	?	12.06	13.125	?	0.88	missing, unknown	0.454545	0.4
9		Ceratosaurus	NMNH 4735	Lmx12	nasicornis	C.H. Pers. obs.	Morrisson Formation	Canyon City, Garden Park, Quarry I	Colorado	U.S.	Kimmeridgian-Tithonian	Late Jurassic	Left	mx12	14.7	?	28.3	30.2	?	1.92517	14.7	?	?	?	?	?	?	?	absent	absent	?	?	?	?	?	?	?	?	?	?	missing, unknown	?	?
10		Ceratosaurus	NMNH 4735	Lmx13	nasicornis	C.H. Pers. obs.	Morrisson Formation	Canyon City, Garden Park, Quarry I	Colorado	U.S.	Kimmeridgian-Tithonian	Late Jurassic	Left	mx13	13.3	?	?	?	?	?	?	?	?	?	?	?	?	?	absent	absent	?	?	?	?	?	?	?	?	?	?	missing, unknown	?	?
11		Ceratosaurus	NMNH 4735	Ldt7	nasicornis	C.H. Pers. obs.	Morrisson Formation	Canyon City, Garden Park, Quarry I	Colorado	U.S.	Kimmeridgian-Tithonian	Late Jurassic	Left	dt7	19	6.5	34.8	40.9	0.342105	1.83158	14.8	6.4	0.432432	0	100	4	?	?	absent	absent	?	12.5	18	10	13	?	15.25	11.5	80.04	0.961538	damaged, unknown	0.4	0.384615
12		Ceratosaurus	NMNH 4735	Ldt9	nasicornis	C.H. Pers. obs.	Morrisson Formation	Canyon City, Garden Park, Quarry I	Colorado	U.S.	Kimmeridgian-Tithonian	Late Jurassic	Left	dt9	18.4	7.3	32.3	39.6	0.396739	1.75543	15.6	7.5	0.480769	0?	100?	4	?	?	absent	absent	?	12.5	?	?	13.33	?	12.5	13.33	86.1118	0.937734	damaged, unknown; wear facet (and not spalled surface) on labial side	0.4	0.375094
13		Ceratosaurus	NMNH 4735	Ldt10	nasicornis	C.H. Pers. obs.	Morrisson Formation	Canyon City, Garden Park, Quarry I	Colorado	U.S.	Kimmeridgian-Tithonian	Late Jurassic	Left	dt10	18.1	7.5	34.5	38.3	0.414365	1.90608	15	6.4	0.426667	?	?	?	?	?	absent	absent	?	?	?	?	?	?	?	?	?	?	damaged, unknown	?	?
14		Ceratosaurus	NMNH 4735	Rdt6	nasicornis	C.H. Pers. obs.	Morrisson Formation	Canyon City, Garden Park, Quarry I	Colorado	U.S.	Kimmeridgian-Tithonian	Late Jurassic	Right	dt6	17.4	8.8	34.6	38.8	0.505747	1.98851	14.3	8.1	0.566434	0	100	?	?	?	absent	absent	?	10	?	11	11.5	?	10	11.25	77.85	0.869565	apex worn out	0.5	0.434783
15		Ceratosaurus	NMNH 4735	Rdt12	nasicornis	C.H. Pers. obs.	Morrisson Formation	Canyon City, Garden Park, Quarry I	Colorado	U.S.	Kimmeridgian-Tithonian	Late Jurassic	Right	dt12	15	8	28.3	29.4	0.533333	1.88667	12.7	5.7	0.448819	?	?	?	?	?	absent	absent	?	11.25	?	?	12.5	?	11.25	12.5	70.75	0.9	damaged (missing tip), unknown	0.444444	0.4
16		Ceratosaurus	NMNH 4735	Rdt13	nasicornis	C.H. Pers. obs.	Morrisson Formation	Canyon City, Garden Park, Quarry I	Colorado	U.S.	Kimmeridgian-Tithonian	Late Jurassic	Right	dt13	14.9	6.7	25.4	26.9	0.449664	1.7047	6.8	5	0.735294	0	100	5	?	?	absent	absent	15	12	?	?	?	?	13.5	?	?	?	damaged (missing tip), unknown	0.416667	?
17		Ceratosaurus	BYU 881 12893	Lmx3	nasicornis	C.H. Pers. obs.	Morrisson Formation	Agate Basin, Emery Co	Utah	U.S.	Kimmeridgian-Tithonian	Late Jurassic	Left	mx3	30.03	11.42	62.47	77.05	0.380286	2.08025	24.24	10.09	0.416254	0?	100?	1	one extremely low on central labial surface	DB DC weak	absent	absent	10	8.75	?	?	9	20	9.375	14.5	181.163	0.972222	tip weakly damaged, almost intact	0.571429	0.555556
18		Ceratosaurus	BYU 881 12893	Lmx5	nasicornis	C.H. Pers. obs.	Morrisson Formation	Agate Basin, Emery Co	Utah	U.S.	Kimmeridgian-Tithonian	Late Jurassic	Left	mx5	30.32	12.51	>52,88	>58,62	0.412599	?	?	?	?	0?	100?	1	one extremely low on central labial surface	DB DC medium to long	absent	absent	?	13.33	20	~10	11.25	?	16.66	10	?	1.18489	missing, unknown	0.375094	0.444444
19		Ceratosaurus	BYU 881 12893	Lmx7	nasicornis	C.H. Pers. obs.	Morrisson Formation	Agate Basin, Emery Co	Utah	U.S.	Kimmeridgian-Tithonian	Late Jurassic	Left	mx7	27.52	9.75	59.96	66.32	0.354288	2.17878	22.21	8.53	0.384061	0?	100?	0	absent	DC medium to long	absent	absent	?	10	12.5	15	10.33	?	11.25	12.665	151.879	0.968054	missing, unknown	0.5	0.484027
20		Ceratosaurus	BYU 881 12893	Lmx8	nasicornis	C.H. Pers. obs.	Morrisson Formation	Agate Basin, Emery Co	Utah	U.S.	Kimmeridgian-Tithonian	Late Jurassic	Left	mx8	22.48	8.63	>32,21	>38,21	0.383897	?	?	?	?	0	100	0	absent	DC labial absent	absent	absent	?	?	?	?	12	?	?	12	?	?	missing, unknown	?	0.416667
21		Ceratosaurus	UMNH VP 5278 (= UMNH VP 7819 of Smith, 2005)	Lpm01	nasicornis (formerly dentisulcatus)	C.H. Pers. obs.	Morrisson Formation	Cleveland-Lloyd Dinosaur Quarry, Emery Co.	Utah	U.S.	Kimmeridgian-Tithonian	Late Jurassic	Left	pm01	24.2	14.53	34.03	39.37	0.600413	1.4062	13.99	11.78	0.84203	33.03	16.1036	2/5mm	tenuous on labial side	?	absent	4	10	/	/	?	8	?	10	8	54.448	1.25	apex well worn out	?	0.625
22		Ceratosaurus	UMNH VP 5278 (= UMNH VP 7819 of Smith, 2005)	Lpm02	nasicornis (formerly dentisulcatus)	C.H. Pers. obs.	Morrisson Formation	Cleveland-Lloyd Dinosaur Quarry, Emery Co.	Utah	U.S.	Kimmeridgian-Tithonian	Late Jurassic	Left	pm02	22.32	17.46	40.19	44.38	0.782258	1.80063	16.48	15.19	0.921723	25.95	41.5277	1 or 2	very tenuous on labial side	absent	absent	3?	?	12.5	/	11.66	8.5	13.33	12.5	11.16	89.7041	1.47059	apex worn out	0.4	0.588235
23		Ceratosaurus	UMNH VP 5278 (= UMNH VP 7819 of Smith, 2005)	Lpm03	nasicornis (formerly dentisulcatus)	C.H. Pers. obs.	Morrisson Formation	Cleveland-Lloyd Dinosaur Quarry, Emery Co.	Utah	U.S.	Kimmeridgian-Tithonian	Late Jurassic	Left	pm03	23.5	14.33	44.09	48.33	0.609787	1.87617	17.42	12.34	0.708381	20.69	57.1902	2	very tenuous on labial side	DC short to absent	absent	7?	10	15	/	?	8.33	?	12.5	8.33	73.4539	1.80072	apex intact	0.333333	0.60024
24		Ceratosaurus	UMNH VP 5278 (= UMNH VP 7819 of Smith, 2005)	Rpm01	nasicornis (formerly dentisulcatus)	C.H. Pers. obs.	Morrisson Formation	Cleveland-Lloyd Dinosaur Quarry, Emery Co.	Utah	U.S.	Kimmeridgian-Tithonian	Late Jurassic	Right	pm01	19.73	14.21	35.93	37.78	0.720223	1.82108	14.33	12.09	0.843685	28.06	25.7279	2	very tenuous on labial side	DC short to absent	absent	4	13	11.25	/	10	8.33	?	12.12	9.16	65.8238	1.35054	intact, with serrations crossing; not fully erupted	0.444444	0.60024
25		Ceratosaurus	UMNH VP 5278 (= UMNH VP 7819 of Smith, 2005)	Rpm03	nasicornis (formerly dentisulcatus)	C.H. Pers. obs.	Morrisson Formation	Cleveland-Lloyd Dinosaur Quarry, Emery Co.	Utah	U.S.	Kimmeridgian-Tithonian	Late Jurassic	Right	pm03	21.96	14.47	40.9	45.1	0.658925	1.86248	17.04	11.48	0.673709	18.7	58.5366	2	very tenuous on labial side	DC short to absent	absent	6	9.5	11.66	/	10	8	11.66	11.66	9.88	80.8184	1.4575	intact, with serrations crossing	0.428816	0.625
26		Ceratosaurus	UMNH VP 5278	Lmx03	nasicornis (formerly dentisulcatus)	C.H. Pers. obs.	Morrisson Formation	Cleveland-Lloyd Dinosaur Quarry, Emery Co.	Utah	U.S.	Kimmeridgian-Tithonian	Late Jurassic	Left	mx03	31.11	13.27	66.46	75.08	0.426551	2.13629	24.93	11.83	0.474529	close to carina	100?	2	many visible with light on labial side	DC medium	absent	absent	8.75	11.5	?	9.5	11.25	?	10.125	10.37	137.838	1.02222	apex weakly worn out	0.434783	0.444444
27		Ceratosaurus	UMNH VP 5278	Lmx05	nasicornis (formerly dentisulcatus)	C.H. Pers. obs.	Morrisson Formation	Cleveland-Lloyd Dinosaur Quarry, Emery Co.	Utah	U.S.	Kimmeridgian-Tithonian	Late Jurassic	Left	mx05	33.8	11.95	72.84	81.37	0.35355	2.15503	29.25	12.79	0.437265	close to carina	100?	2 to 3	tenuous on lingual side, short marginal undulations close to DC on lingual	DC medium	absent	absent	9.375	10.83	?	?	11	15	10.1	13	189.384	0.984545	intact	0.461681	0.454545
28		Ceratosaurus	UMNH VP 5278	Lmx08	nasicornis (formerly dentisulcatus)	C.H. Pers. obs.	Morrisson Formation	Cleveland-Lloyd Dinosaur Quarry, Emery Co.	Utah	U.S.	Kimmeridgian-Tithonian	Late Jurassic	Left	mx08	27.46	8.68	54.13	57.42	0.316096	1.97123	23.56	9.06	0.38455	0	100	2	tenous on lingual side	MC short, DC medium	absent	absent	11.5	11.5	17.5	11	11	15	13.5	12.33	133.485	1.04545	intact, denticles crossing	0.434783	0.454545
29		Ceratosaurus	UMNH VP 5278	Lmx10	nasicornis (formerly dentisulcatus)	C.H. Pers. obs.	Morrisson Formation	Cleveland-Lloyd Dinosaur Quarry, Emery Co.	Utah	U.S.	Kimmeridgian-Tithonian	Late Jurassic	Left	mx10	20.98	9.73	41.42	43.3	0.463775	1.97426	18.03	8.11	0.449806	close to carina	100?	2	visible on lingual side	DC medium	absent	absent	10	13	?	11.66	11.66	?	11.5	11.66	96.5914	1.11492	missing, unknown	0.384615	0.428816
30		Ceratosaurus	UMNH VP 5278	Ldt1	nasicornis (formerly dentisulcatus)	C.H. Pers. obs.	Morrisson Formation	Cleveland-Lloyd Dinosaur Quarry, Emery Co.	Utah	U.S.	Kimmeridgian-Tithonian	Late Jurassic	Left	dt1	16.25	13.69	>28,07	>25,16	0.842462	?	?	?	?	19.92	?	?	?	absent	absent	5	?	12	/	?	8	?	12	8	1.6	1.5	strongly worned out on labial side + large spalled surface on lingual side	0.416667	0.625
31		Ceratosaurus	UMNH VP 5278	Ldt2	nasicornis (formerly dentisulcatus)	C.H. Pers. obs.	Morrisson Formation	Cleveland-Lloyd Dinosaur Quarry, Emery Co.	Utah	U.S.	Kimmeridgian-Tithonian	Late Jurassic	Left	dt2	18.61	14.28	32.26	27.45	0.767329	1.73348	14.1	9.95	0.705674	15.61	43.133	2	very tenuous on labial side	DC short	absent	4	?	13	/	?	10	12.5	13	11.25	72.585	1.3	apex well worn out	0.384615	0.5
32		Ceratosaurus	UMNH VP 5278	Ldt8	nasicornis (formerly dentisulcatus)	C.H. Pers. obs.	Morrisson Formation	Cleveland-Lloyd Dinosaur Quarry, Emery Co.	Utah	U.S.	Kimmeridgian-Tithonian	Late Jurassic	Left	dt8	21.99	9.21	39.16	40.41	0.418827	1.78081	18.55	8.35	0.450135	close to carina	100?	3	visible with light on labial side	M absent, D?	absent	absent	?	12	17.5	?	12	?	14.75	12	93.984	1	tip missing, worn out or damaged?	0.416667	0.416667
33		Ceratosaurus	UMNH VP 5278	Ldt9	nasicornis (formerly dentisulcatus)	C.H. Pers. obs.	Morrisson Formation	Cleveland-Lloyd Dinosaur Quarry, Emery Co.	Utah	U.S.	Kimmeridgian-Tithonian	Late Jurassic	Left	dt9	17.62	7.38	30.29	30.1	0.418842	1.71907	14.62	6.91	0.47264	close to carina	100?	2	very tenous on lingual side	DC short on labial	absent	absent	13.75	12.5	?	12.5	11.66	13	13.125	12.39	75.0586	1.07204	apex slightly worn out	0.4	0.428816
34	Marshosaurus	Marshosaurus	UMNH VP 6368	Rdt4	bicentesimus	C.H. Pers. obs.	Brushy Basin Member, Morrisson Formation	Emery County	Utah	USA	Kimmeridgian	Late Jurassic	Right	dt4	10.32	5.76	20.91	23.82	0.55814	2.02616	7.49	4.32	0.576769	8.87	62.7624	0	absent	DC short on labial	absent	absent	?	20	/	16.66	15	20	20	17.22	72.014	1.33333	tip weakly worn out	0.25	0.333333
35		Marshosaurus	UMNH VP 6368	Rdt6	bicentesimus	C.H. Pers. obs.	Brushy Basin Member, Morrisson Formation	Emery County	Utah	USA	Kimmeridgian	Late Jurassic	Right	dt6	8.82	4.52	>15,11	>19,23	0.512472	?	?	?	?	?	?	0	absent	DC short on labial	absent	absent	?	?	?	?	16.25	?	?	16.25	?	?	missing, unknown	?	0.307692
36		Marshosaurus	UMNH VP 6368	Rdt7	bicentesimus	C.H. Pers. obs.	Brushy Basin Member, Morrisson Formation	Emery County	Utah	USA	Kimmeridgian	Late Jurassic	Right	dt7	8.31	4.95	13.16	16.45	0.595668	1.58363	6.73	3.54	0.526003	11.76	28.5106	3	very tenuous on labial side	?	absent	absent	17.5	?	/	?	17.5	?	17.5	17.5	46.06	?	missing, unknown	?	0.285714
37		Marshosaurus	UMNH VP 7824	Rmx3	bicentesimus	C.H. Pers. obs.	Brushy Basin Member, Morrisson Formation	Emery County	Utah	USA	Kimmeridgian	Late Jurassic	Right	mx3	14.12	7.18	>26.92	>28.45	0.508499	?	?	?	?	12.98	>54	0	absent	DC short on labial	absent	absent	?	17.5	/	?	16.66	20	17.5	18.33	?	1.05042	missing, unknown	0.285714	0.30012
38		Marshosaurus	DMNS 3718	Lpmx2	bicentesimus	C.H. Pers. obs.	Morrisson Formation	Moffat	Colorado	USA	Kimmeridgian-Tithonian	Late Jurassic	Left	pmx2	10.28	5.63	>10.85	>11.2	0.547665	?	?	?	?	?	?	?	absent?	D short to medium on lingual	absent	absent	?	?	?	?	24	32.5	?	28.25	?	?	damaged (missing apex) + extensive spalled surface on lingual side	?	0.208333
39		Marshosaurus	DMNS 3718	Rmx2	bicentesimus	C.H. Pers. obs.	Morrisson Formation	Moffat	Colorado	USA	Kimmeridgian-Tithonian	Late Jurassic	Right	mx2	15.55	5.5	31.31	29.48	0.353698	2.0135	12.02	5.86	0.487521	?	?	2/3mm	very tenuous on labial	absent	absent	absent	?	20	?	?	15	?	20	15	93.93	1.33333	apex worn out, spalled surface on labial side	0.25	0.333333
40		Marshosaurus	DMNS 3718	Rmx4	bicentesimus	C.H. Pers. obs.	Morrisson Formation	Moffat	Colorado	USA	Kimmeridgian-Tithonian	Late Jurassic	Right	mx4	16.55	5.43	40.9	42.3	0.328097	2.4713	15.07	6.25	0.414731	?	?	2/3 or 4mm	visible with light on labial side	?	absent	absent	?	?	?	15.5	15	?	?	15.25	124.745	?	tip extremity worn out, almost intact	?	0.333333
41		Marshosaurus	DMNS 3718	Rmx7	bicentesimus	C.H. Pers. obs.	Morrisson Formation	Moffat	Colorado	USA	Kimmeridgian-Tithonian	Late Jurassic	Right	mx7	15.58	4.44	23.92	29.25	0.284981	1.5353	11.85	5.22	0.440506	?	?	2/3mm	tenuous on labial and lingual	?	absent	absent	?	?	?	?	16.66	?	?	16.66	79.7014	?	apex worn out, big spalled surface on labial side	?	0.30012
42		Marshosaurus	DMNS 3718	Rmx9	bicentesimus	C.H. Pers. obs.	Morrisson Formation	Moffat	Colorado	USA	Kimmeridgian-Tithonian	Late Jurassic	Right	mx9	12.51	4.69	19.51	25.75	0.3749	1.55955	10.17	4.31	0.423795	?	?	2/3mm	visible with light on labial	?	absent	absent	?	18.75	?	?	16.25	19.16	18.75	17.705	69.0849	1.15385	apex almost intact but small spalled surface on labial side	0.266667	0.307692
43		Marshosaurus	DMNS 3718	Rmx10	bicentesimus	C.H. Pers. obs.	Morrisson Formation	Moffat	Colorado	USA	Kimmeridgian-Tithonian	Late Jurassic	Right	mx10	11.8	3.67	18	20.66	0.311017	1.52542	10.09	4.58	0.453915	?	?	2/2mm	visible with light on labial	?	absent	absent	?	21	?	?	17.5	20	21	18.75	67.5	1.2	apex missing; due to wear?	0.238095	0.285714
44		Marshosaurus	DMNS 3718	Rmx13	bicentesimus	C.H. Pers. obs.	Morrisson Formation	Moffat	Colorado	USA	Kimmeridgian-Tithonian	Late Jurassic	Right	mx13	7.3	3.14	7.77	9.73	0.430137	1.06438	5.53	3.12	0.564195	4.05	58.3762	2/1mm	very tenuous on labial	?	absent	absent	?	37.5	?	20	20	?	37.5	20	?	1.875	apex almost intact	0.133333	0.25
45		Marshosaurus	DMNS 3718, flat root	Isolated	bicentesimus	C.H. Pers. obs.	Morrisson Formation	Moffat	Colorado	USA	Kimmeridgian-Tithonian	Late Jurassic	/	Isolated	12.4	?	28.09	27.93	?	2.26532	9.69	?	?	?	?	2/2mm	very tenuous on lingual	D short on lingual	absent	absent	30	21.25	?	15.625	16.25	?	25.62	15.94	89.5509	1.30769	missing enamel on labial side but not genuine	0.235294	0.307692
46		Marshosaurus	DMNS 3718, small long broken root	Isolated, mesial	bicentesimus	C.H. Pers. obs.	Morrisson Formation	Moffat	Colorado	USA	Kimmeridgian-Tithonian	Late Jurassic	/	Isolated, mesial	7.77	?	18.4	17.62	?	2.36808	5.51	3.22	0.584392	11.22	36.3224	0	absent	?	absent	absent	?	25	/	21.25	18.75	25.83	25	21.94	?	1.33333	tip weakly worn out, tip of apex worn out	0.2	0.266667
47		Marshosaurus	DMNS 3718, shed tooth with missing distal base	Isolated, lateral	bicentesimus	C.H. Pers. obs.	Morrisson Formation	Moffat	Colorado	USA	Kimmeridgian-Tithonian	Late Jurassic	/	Isolated, lateral	?	7	?	31.99	?	?	?	?	?	?	?	3/5mm	well-visible on labial	D short to medium on labial	absent	absent	?	?	?	14.375	14.5	?	?	14.5	?	?	missing tip but most likely intact	?	0.344828
48		Marshosaurus (most likely Allosaurus)	DMNS 3718, shed tooth missing root and most basodistal portion of crown	Isolated	bicentesimus	C.H. Pers. obs.	Morrisson Formation	Moffat	Colorado	USA	Kimmeridgian-Tithonian	Late Jurassic	/	Isolated lateral	?	?	?	?	?	?	?	?	?	?	?	?	?	?	?	?	?	?	?	?	?	?	?	?	?	?	extensive wear on mesial side of tip (probably Allosaurus)	?	?
49	Torvosaurus	Torvosaurus	BYUVP 725 2003	dt6	tanneri	C.H. Pers. obs.	Morrisson Formation	Dry Mesa Quarry, Dry Mesa	Colorado	U.S.	Kimmeridgian-Tithonian	Late Jurassic	Left	dt6	?	?	?	?	?	?	?	?	?	?	?	?	?	?	absent	absent	?	?	?	?	?	?	?	?	?	?	tip of apex worn out	?	?
50		Torvosaurus	BYUVP 725 12817	Isolated	tanneri	C.H. Pers. obs.	Morrisson Formation	Dry Mesa Quarry, Dry Mesa	Colorado	U.S.	Kimmeridgian-Tithonian	Late Jurassic	/	Isolated	42.43	21.09	105.28	105.12	0.497054	2.48126	28.13	15.67	0.557057	0	100	2	well visible close to D carina	D medium to long, M labial long	absent	absent	8	6	?	6	7	12	7	8.33333	175.467	0.857143	enamel missing on tip but apex appears intact	0.833333	0.714286
51		Torvosaurus	BMNH R36728 (cast; Presid. Martin Munt 18/10/2013)	Isolated	cf. tanneri	C.H. Pers. obs.	Morrisson Formation	Moffat County	Utah	U.S.	Kimmeridgian-Tithonian	Late Jurassic	/	Isolated	40.44	21.54	101.98	102.36	0.532641	2.52176	30.68	15.08	0.491525	45.33	55.7151	1-2	relatively tenuous, short	D medium to long, M labial long	absent	absent	7	7.5	/	?	7.5	?	7.25	7	142.772	1	tip unpreserved or strongly worn out	0.666667	0.666667
52		Torvosaurus	ML 1100	Lmx02	gurneyi	C.H. Pers. obs.	Lourinhã Formation	Cliffs of Praia da Vermelha, Peniche Municipality	Lisbon District	Portugal	Upper Kimmeridgian	Late Jurassic	Left	mx02	45.52	16.4	106.4	118.57	0.360281	2.33743	33.1	16.8	0.507553	55.51	53.1838	1	extremely tenuous	D well-developped, M short to medium	absent	absent	6	8	/	7	8	11	7	8.66667	184.427	1	apex weakly worn out, almost intact	0.625	0.625
53		Torvosaurus	ML 1100	Lmx03	gurneyi	C.H. Pers. obs.	Lourinhã Formation	Cliffs of Praia da Vermelha, Peniche Municipality	Lisbon District	Portugal	Upper Kimmeridgian	Late Jurassic	Left	mx03	45.65	?	116.98	128.59	?	2.56254	39.54	?	?	46.38	63.9319	1 or 2	visible labially and lingually	D well developped, M short	absent	absent	6	7	/	6	8	10	6.5	8	187.168	0.875	NA	0.714286	0.625
54		Torvosaurus	SHN.400	Rmx02	gurneyi	Malafaia et al., 2017	Lourinhã Formation	Cliffs of Praia da Vermelha, Peniche Municipality	Lisbon District	Portugal	Upper Kimmeridgian	Late Jurassic	Right	mx02	42.16	18.74	140	?	0.444497	3.32068	?	?	?	?	?	?	?	?	?	?	?	?	?	?	?	?	?	?	?	?	apex intact	?	?
55		Torvosaurus	SHN.440	Isolated	gurneyi	Malafaia et al., 2017	Lourinhã Formation	Valmitão, Lourinhã	Lisbon District	Portugal	Upper Kimmeridgian - Lowermost Tithonian	Late Jurassic	/	Isolated	25.75	14.04	70.29	78.49	0.55	2.73	?	?	?	?	?	?	?	?	?	?	?	/	?	?	7	?	0	7	98.406	?	?	?	0.714286
56		Torvosaurus	ML 1853	Isolated	cf. gurneyi	C.H. Pers. obs.	Lourinhã Formation	Lourinhã area	Lisbon District	Portugal	Kimmeridgian-Tithonian	Late Jurassic	/	Isolated	24.81	13.74	43.53	46.39	0.553809	1.75453	21.5	11.16	0.51907	16.52	64.3889	1 or 2	very tenuous	D well developped, M short to absent	absent	absent	7.5	9.5	/	7.5	9.5	?	8.5	8.5	74.001	1	tip intact (distalmost tooth)	0.526316	0.526316
57		Torvosaurus	ML 148	Isolated	cf. gurneyi	C.H. Pers. obs.	Lourinhã Formation	Lourinhã area	Lisbon District	Portugal	Kimmeridgian-Tithonian	Late Jurassic	/	Isolated	35.22	17.66	>45,2	>43,7	0.50142	?	27.63	14.06	0.508867	9.39	?	2	well-visible	D medium to well developped	absent	absent	?	7.5	/	?	8.125	11.5	7.5	10	?	0.772727	missing, unknown	0.666667	0.615385
58		Torvosaurus	ML 500 (figured in Mateus, 2003) = ML 1792	Isolated	cf. gurneyi	C.H. Pers. obs.	Lourinhã Formation	Lourinhã area	Lisbon District	Portugal	Kimmeridgian-Tithonian	Late Jurassic	/	Isolated	41.32	19.94	>106,97	>114,33	0.482575	~2,8	34.82	19.2	0.551407	18.89	?	1 or 2	very well visible on both carinae, short close to M	D well developped, M absent	absent	absent	6	7	/	6	7	12	6.5	8.33333	?	1	missing, unknown	0.714286	0.714286
59		Torvosaurus	ML 857	Isolated	cf. gurneyi	C.H. Pers. obs.	Lourinhã Formation	Lourinhã area	Lisbon District	Portugal	Kimmeridgian - Tithonian	Late Jurassic	/	Isolated	32.2	15.8	61.1	67.8	0.490683	1.89752	?	?	?	?	?	?	?	?	?	?	9	10	/	7	8	10	9.5	8.33333	101.833	1.25	perfectly intact	0.5	0.625
60		Torvosaurus	ML 962 (Mesial)	Isolated, mesial	cf. gurneyi	C.H. Pers. obs.	Lourinhã Formation	Cliffs of Praia da Area Branca North, Praia da Area Branca, Lourinhã,	Lisbon District	Portugal	Tithonian	Late Jurassic	/	Isolated, mesial	31.2	20.2	85.8	91.9	0.647436	2.75	?	?	?	30	67.3558	?	?	DB short	absent	absent	/	8	/	7	8	11	8	8.66667	148.72	0.931034	missing, unknown	0.625	0.625
61		Torvosaurus	SHN.067 (illustrated)	Isolated	cf. gurneyi	Malafaia et al., 2017	Lourinhã Formation	Almagreira, Peniche	Lisbon District	Portugal	Upper Kimmeridgian - Lowermost Tithonian	Late Jurassic	/	Isolated	47.99	22.89	141.52	145.07	0.48	2.95	?	?	?	?	?	?	?	?	?	?	?	5	?	?	5	?	5	5	141.52	1	tip missing but apex appears close to complete	1	1
62		Torvosaurus	SHN.215 (illustrated; photos from E. Malafaia)	Isolated, mesiolateral?	cf. gurneyi	Malafaia et al., 2017	Lourinhã Formation	Santa Rita, Torres Vedras	Lisbon District	Portugal	Upper Kimmeridgian - Lowermost Tithonian	Late Jurassic	/	Isolated	25.35	12.62	62.29	63.64	0.5	2.46	?	?	?	?	?	?	?	?	?	?	?	7.5	?	?	7.5	?	7.5	7.5	93.435	1	apex strongly worn out, especially mesial surface	0.666667	0.666667
63		Torvosaurus	SHN.221	Isolated	cf. gurneyi	Malafaia et al., 2017	Lourinhã Formation	Peralta, Lourinhã	Lisbon District	Portugal	Upper Kimmeridgian - Lowermost Tithonian	Late Jurassic	/	Isolated	30.65	17.55	79.79	84.91	0.57	2.6	?	?	?	?	?	?	?	?	?	?	?	7	?	?	6	?	7	6	95.748	1.16667	?	0.714286	0.833333
64		Torvosaurus	SHN.257 (photos from E. Malafaia)	Isolated, mesial	cf. gurneyi	Malafaia et al., 2017	Lourinhã Formation	?Almagreira, Peniche	Lisbon District	Portugal	Upper Kimmeridgian - Lowermost Tithonian	Late Jurassic	/	Isolated	22.68	15.15	57.21	60.15	0.67	2.52	?	?	?	?	?	?	?	?	?	?	?	8	?	?	8	?	8	8	91.536	1	missing tip; unknown	0.625	0.625
65		Torvosaurus	SHN.266 (illustrated)	Isolated	cf. gurneyi	Malafaia et al., 2017	Lourinhã Formation	Praia da Corva, Torres Vedras	Lisbon District	Portugal	Upper Kimmeridgian - Lowermost Tithonian	Late Jurassic	/	Isolated	26.31	12.02	57.2	66.55	0.46	2.17	?	?	?	?	?	?	?	?	?	?	?	8	?	?	10	?	8	10	114.4	0.8	tip of apex worn out	0.625	0.5
66		Torvosaurus	SHN.268	Isolated	cf. gurneyi	Malafaia et al., 2017	Lourinhã Formation	Porto Dinheiro, Lourinhã	Lisbon District	Portugal	Upper Kimmeridgian - Lowermost Tithonian	Late Jurassic	/	Isolated	36.27	16.93	91.72	98.86	0.47	2.53	?	?	?	?	?	?	?	?	?	?	?	5	?	?	6	?	5	6	110.064	0.833333	?	1	0.833333
67		Torvosaurus	SHN.294	Isolated	cf. gurneyi	Malafaia et al., 2017	Lourinhã Formation	Valmitão, Lourinhã	Lisbon District	Portugal	Upper Kimmeridgian - Lowermost Tithonian	Late Jurassic	/	Isolated	23.23	13.75	52.25	56.71	0.59	2.25	?	?	?	?	?	?	?	?	?	?	?	8	?	?	8	?	8	8	83.6	1	?	0.625	0.625
68		Torvosaurus	SHN.303	Isolated	cf. gurneyi	Malafaia et al., 2017	Lourinhã Formation	Salir do Porto, Caldas da Rainha	Lisbon District	Portugal	Upper Kimmeridgian - Lowermost Tithonian	Late Jurassic	/	Isolated	34.04	18.48	?	?	0.54	?	?	?	?	?	?	?	?	?	?	?	?	7	?	?	6	?	7	6	1.2	1.16667	?	0.714286	0.833333
69		Torvosaurus	SHN.304	Isolated	cf. gurneyi	Malafaia et al., 2017	Lourinhã Formation	Valmitão, Lourinhã	Lisbon District	Portugal	Upper Kimmeridgian - Lowermost Tithonian	Late Jurassic	/	Isolated	25.11	14.17	65.5	65.99	0.56	2.61	?	?	?	?	?	?	?	?	?	?	?	?	?	?	8	?	?	8	104.8	?	?	?	0.625
70		Torvosaurus	SHN.319 (illustrated)	Isolated	cf. gurneyi	Malafaia et al., 2017	Lourinhã Formation	Valmitão, Lourinhã	Lisbon District	Portugal	Upper Kimmeridgian - Lowermost Tithonian	Late Jurassic	/	Isolated	33.69	20.4	93.87	97.05	0.61	2.79	?	?	?	?	?	?	?	?	?	?	?	8	?	?	8.5	?	8	8.5	159.579	0.941176	apex intact	0.625	0.588235
71		Torvosaurus	SHN.320	Isolated	cf. gurneyi	Malafaia et al., 2017	Lourinhã Formation	Valmitão, Lourinhã	Lisbon District	Portugal	Upper Kimmeridgian - Lowermost Tithonian	Late Jurassic	/	Isolated	39.71	21.6	109.51	116.79	0.54	2.76	?	?	?	?	?	?	?	?	?	?	?	7	?	?	7	?	7	7	153.314	1	?	0.714286	0.714286
72		Torvosaurus	SHN.359a	Isolated	cf. gurneyi	Malafaia et al., 2017	Lourinhã Formation	Porto Novo, Torres Vedras	Lisbon District	Portugal	Upper Kimmeridgian - Lowermost Tithonian	Late Jurassic	/	Isolated	16.26	7.87	38.76	40.25	0.48	2.38	?	?	?	?	?	?	?	?	?	?	?	10	?	?	10	?	10	10	77.52	1	?	0.5	0.5
73		Torvosaurus	SHN.362	Isolated	cf. gurneyi	Malafaia et al., 2017	Lourinhã Formation	Salir do Porto, Caldas da Rainha	Lisbon District	Portugal	Upper Kimmeridgian - Lowermost Tithonian	Late Jurassic	/	Isolated	26.39	14.58	52.77	57.95	0.55	2	?	?	?	?	?	?	?	?	?	?	?	6.5	?	?	7	?	6.5	7	73.878	0.928571	?	0.769231	0.714286
74		Torvosaurus	SHN.364 (photos from E. Malafaia)	Isolated, mesial	cf. gurneyi	Malafaia et al., 2017	Lourinhã Formation	Praia da Corva, Torres Vedras	Lisbon District	Portugal	Upper Kimmeridgian - Lowermost Tithonian	Late Jurassic	/	Isolated	21.54	15.58	54.46	54.81	0.72	2.53	?	?	?	?	?	?	?	?	?	?	?	?	?	?	8	?	?	8	87.136	?	apex worn out, especially on distal surface	?	0.625
75		Torvosaurus	SHN.374	Isolated	cf. gurneyi	Malafaia et al., 2017	Lourinhã Formation	Praia da Corva, Torres Vedras	Lisbon District	Portugal	Upper Kimmeridgian - Lowermost Tithonian	Late Jurassic	/	Isolated	47.09	16.75	104.99	117.91	0.36	2.23	?	?	?	?	?	?	?	?	?	?	?	6	?	?	7	?	6	7	146.986	0.857143	?	0.833333	0.714286
76		Torvosaurus	SHN.381	Isolated	cf. gurneyi	Malafaia et al., 2017	Lourinhã Formation	Valmitão, Lourinhã	Lisbon District	Portugal	Upper Kimmeridgian - Lowermost Tithonian	Late Jurassic	/	Isolated	31.28	17.44	?	?	0.56	?	?	?	?	?	?	?	?	?	?	?	?	8.5	?	?	8	?	8.5	8	1.6	1.0625	?	0.588235	0.625
77		Torvosaurus	SHN.401 (illustrated; photos from E. Malafaia)	Isolated	cf. gurneyi	Malafaia et al., 2017	Lourinhã Formation	Porto Dinheiro, Lourinhã	Lisbon District	Portugal	Upper Kimmeridgian - Lowermost Tithonian	Late Jurassic	/	Isolated	48.35	20.64	145.55	152.84	0.43	3.01	?	?	?	?	?	?	?	?	?	?	?	7	?	?	6	?	7	6	174.66	1.16667	apex almost intact	0.714286	0.833333
78		Torvosaurus	SHN.441 (illustrated)	Isolated	cf. gurneyi	Malafaia et al., 2017	Lourinhã Formation	Praia dos Frades, Peniche	Lisbon District	Portugal	Upper Kimmeridgian - Lowermost Tithonian	Late Jurassic	/	Isolated	42.44	23.49	123.67	129.76	0.55	2.91	?	?	?	?	?	?	?	?	?	?	?	7.5	?	?	6.5	?	7.5	6.5	160.771	1.15385	apex almost intact	0.666667	0.769231
79		Torvosaurus	SHN.442	Isolated	cf. gurneyi	Malafaia et al., 2017	Lourinhã Formation	Valmitão, Lourinhã	Lisbon District	Portugal	Upper Kimmeridgian - Lowermost Tithonian	Late Jurassic	/	Isolated	29.1	16.41	84.13	86.24	0.56	2.89	?	?	?	?	?	?	?	?	?	?	?	?	?	?	7	?	?	7	117.782	?	?	?	0.714286
80		Torvosaurus	SHN.470 (illustrated)	Isolated	cf. gurneyi	Malafaia et al., 2017	Lourinhã Formation	Porto Dinheiro, Lourinhã	Lisbon District	Portugal	Upper Kimmeridgian - Lowermost Tithonian	Late Jurassic	/	Isolated	48.38	19.94	145.54	152.44	0.41	3.01	?	?	?	?	?	?	?	?	?	?	?	7	?	?	7.5	?	7	7.5	218.31	0.933333	apex worn out	0.714286	0.666667
81	Allosaurus	Allosaurus	SMA 0005/02 "Big Al 2"	Lpmx2	jimmadseni	C.H. Pers. obs.	Morrison Formation	Howe-Stephens Quarry	Wyoming	U.S.	Kimmeridgian	Late Jurassic	Left	pmx2	17.3	18.73	39.37	38.28	1.08266	2.27572	15.66	12.3	0.785441	?	?	0	absent	absent	absent	absent	?	?	?	?	?	?	?	?	?	?	?	?	?
82		Allosaurus	SMA 0005/02 "Big Al 2"	Lpmx3	jimmadseni	C.H. Pers. obs.	Morrison Formation	Howe-Stephens Quarry	Wyoming	U.S.	Kimmeridgian	Late Jurassic	Left	pmx3	20.87	18.03	55.6	55.96	0.86392	2.66411	17.38	12.25	0.704833	?	?	0	absent	?	absent	absent	?	?	?	?	?	?	?	?	?	?	?	?	?
83		Allosaurus	SMA 0005/02 "Big Al 2"	Lpmx4	jimmadseni	C.H. Pers. obs.	Morrison Formation	Howe-Stephens Quarry	Wyoming	U.S.	Kimmeridgian	Late Jurassic	Left	pmx4	18.88	22.6	54.66	59.22	1.19703	2.89513	16.6	13.51	0.813855	?	?	0	absent	?	absent	absent	?	?	?	?	?	?	?	?	?	?	?	?	?
84		Allosaurus	SMA 0005/02 "Big Al 2"	Lpmx5	jimmadseni	C.H. Pers. obs.	Morrison Formation	Howe-Stephens Quarry	Wyoming	U.S.	Kimmeridgian	Late Jurassic	Left	pmx5	18.39	12.98	50.17	58.5	0.705818	2.72811	14.17	8.69	0.613267	?	?	?	?	?	absent	absent	?	?	?	?	?	?	?	?	?	?	?	?	?
85		Allosaurus	SMA 0005/02 "Big Al 2"	Lmx3	jimmadseni	C.H. Pers. obs.	Morrison Formation	Howe-Stephens Quarry	Wyoming	U.S.	Kimmeridgian	Late Jurassic	Left	mx3	25.78	17.61	40.32	46.37	0.683088	1.564	20.93	12.48	0.596273	?	?	?	?	?	absent	absent	?	?	?	?	?	?	?	?	?	?	?	?	?
86		Allosaurus	SMA 0005/02 "Big Al 2"	Lmx4	jimmadseni	C.H. Pers. obs.	Morrison Formation	Howe-Stephens Quarry	Wyoming	U.S.	Kimmeridgian	Late Jurassic	Left	mx4	22.43	16.88	50.93	53.54	0.752564	2.27062	20.08	11.74	0.584661	?	?	?	?	DB well developped, DC short/absent	absent	absent	?	?	?	?	?	?	?	?	?	?	?	?	?
87		Allosaurus	SMA 0005/02 "Big Al 2"	Lmx5	jimmadseni	C.H. Pers. obs.	Morrison Formation	Howe-Stephens Quarry	Wyoming	U.S.	Kimmeridgian	Late Jurassic	Left	mx5	22.6	14.53	46.71	54.47	0.64292	2.06681	21.24	13.23	0.622881	?	?	?	?	DC developped	absent	absent	?	?	?	?	?	?	?	?	?	?	?	?	?
88		Allosaurus	SMA 0005/02 "Big Al 2"	Lmx6	jimmadseni	C.H. Pers. obs.	Morrison Formation	Howe-Stephens Quarry	Wyoming	U.S.	Kimmeridgian	Late Jurassic	Left	mx6	23.07	16.42	42.31	52.02	0.711747	1.83398	19.78	9.13	0.461577	?	?	?	?	DB well developed	absent	absent	?	?	?	?	?	?	?	?	?	?	?	?	?
89		Allosaurus	SMA 0005/02 "Big Al 2"	Lmx7	jimmadseni	C.H. Pers. obs.	Morrison Formation	Howe-Stephens Quarry	Wyoming	U.S.	Kimmeridgian	Late Jurassic	Left	mx7	16.8	10.21	30.04	36.34	0.607738	1.7881	13.31	6.49	0.487603	?	?	?	?	?	absent	absent	?	?	?	?	?	?	?	?	?	?	?	?	?
90		Allosaurus	SMA 0005/02 "Big Al 2"	Lmx8	jimmadseni	C.H. Pers. obs.	Morrison Formation	Howe-Stephens Quarry	Wyoming	U.S.	Kimmeridgian	Late Jurassic	Left	mx8	23.35	16.33	52.3	58.98	0.699358	2.23983	22.63	11.79	0.52099	?	?	?	?	?	absent	absent	?	?	?	?	?	?	?	?	?	?	?	?	?
91		Allosaurus	SMA 0005/02 "Big Al 2"	Rmx1	jimmadseni	C.H. Pers. obs.	Morrison Formation	Howe-Stephens Quarry	Wyoming	U.S.	Kimmeridgian	Late Jurassic	Right	mx1	21.37	14.94	46.95	43.67	0.699111	2.19701	17.15	13.49	0.786589	?	?	?	?	?	absent	absent	?	?	?	?	?	?	?	?	?	?	?	?	?
92		Allosaurus	SMA 0005/02 "Big Al 2"	Rmx2	jimmadseni	C.H. Pers. obs.	Morrison Formation	Howe-Stephens Quarry	Wyoming	U.S.	Kimmeridgian	Late Jurassic	Right	mx2	22.3	19.37	59.53	67.88	0.86861	2.66951	16.51	9.92	0.600848	?	?	?	?	?	absent	absent	?	?	?	?	?	?	?	?	?	?	?	?	?
93		Allosaurus	SMA 0005/02 "Big Al 2"	Rmx3	jimmadseni	C.H. Pers. obs.	Morrison Formation	Howe-Stephens Quarry	Wyoming	U.S.	Kimmeridgian	Late Jurassic	Right	mx3	18.84	12.69	49.09	58.92	0.673567	2.60563	13.95	9.52	0.682437	?	?	?	?	?	absent	absent	?	?	?	?	?	?	?	?	?	?	?	?	?
94		Allosaurus	SMA 0005/02 "Big Al 2"	Rmx4	jimmadseni	C.H. Pers. obs.	Morrison Formation	Howe-Stephens Quarry	Wyoming	U.S.	Kimmeridgian	Late Jurassic	Right	mx4	19.92	13.08	53.265	60.22	0.656627	2.67395	18.56	10.77	0.58028	?	?	?	?	?	absent	absent	?	?	?	?	?	?	?	?	?	?	?	?	?
95		Allosaurus	SMA 0005/02 "Big Al 2"	Rmx5	jimmadseni	C.H. Pers. obs.	Morrison Formation	Howe-Stephens Quarry	Wyoming	U.S.	Kimmeridgian	Late Jurassic	Right	mx5	20.26	14.04	49.43	59.03	0.692991	2.43978	14.9	9.23	0.619463	?	?	?	?	?	absent	absent	?	?	?	?	?	?	?	?	?	?	?	?	?
96		Allosaurus	SMA 0005/02 "Big Al 2"	Rmx6	jimmadseni	C.H. Pers. obs.	Morrison Formation	Howe-Stephens Quarry	Wyoming	U.S.	Kimmeridgian	Late Jurassic	Right	mx6	18.38	16.64	68.85	69.21	0.905332	3.74592	16.89	10.48	0.620485	?	?	?	?	?	absent	absent	?	?	?	?	?	?	?	?	?	?	?	?	?
97		Allosaurus	SMA 0005/02 "Big Al 2"	Rmx7	jimmadseni	C.H. Pers. obs.	Morrison Formation	Howe-Stephens Quarry	Wyoming	U.S.	Kimmeridgian	Late Jurassic	Right	mx7	18.95	12.49	55.37	64.5	0.659103	2.9219	16.1	9.15	0.568323	?	?	?	?	?	absent	absent	?	?	?	?	?	?	?	?	?	?	?	?	?
98		Allosaurus	SMA 0005/02 "Big Al 2"	Rmx8	jimmadseni	C.H. Pers. obs.	Morrison Formation	Howe-Stephens Quarry	Wyoming	U.S.	Kimmeridgian	Late Jurassic	Right	mx8	20.66	13.38	40.2	43.28	0.647628	1.94579	15.73	10.81	0.687222	?	?	?	?	?	absent	absent	?	?	?	?	?	?	?	?	?	?	?	?	?
99		Allosaurus	SMA 0005/02 "Big Al 2"	Rmx9	jimmadseni	C.H. Pers. obs.	Morrison Formation	Howe-Stephens Quarry	Wyoming	U.S.	Kimmeridgian	Late Jurassic	Right	mx9	20.31	11.35	38.34	45.45	0.558838	1.88774	16.74	9.81	0.586022	?	?	?	?	?	absent	absent	?	?	?	?	?	?	?	?	?	?	?	?	?
100		Allosaurus	SMA 0005/02 "Big Al 2"	Rmx10	jimmadseni	C.H. Pers. obs.	Morrison Formation	Howe-Stephens Quarry	Wyoming	U.S.	Kimmeridgian	Late Jurassic	Right	mx10	16.31	7.04	29.84	34.23	0.431637	1.82955	12.98	6.33	0.487673	?	?	?	?	?	absent	absent	?	?	?	?	?	?	?	?	?	?	?	?	?
101		Allosaurus	SMA 0005/02 "Big Al 2"	Rmx11	jimmadseni	C.H. Pers. obs.	Morrison Formation	Howe-Stephens Quarry	Wyoming	U.S.	Kimmeridgian	Late Jurassic	Right	mx11	20.82	10.03	59.9	66.72	0.481748	2.87704	17.36	8.3	0.478111	?	?	?	?	?	absent	absent	?	?	?	?	?	?	?	?	?	?	?	?	?
102		Allosaurus	SMA 0005/02 "Big Al 2"	Rmx12	jimmadseni	C.H. Pers. obs.	Morrison Formation	Howe-Stephens Quarry	Wyoming	U.S.	Kimmeridgian	Late Jurassic	Right	mx12	22.06	8	62	65.36	0.362647	2.81052	17.19	7.67	0.44619	?	?	?	?	?	absent	absent	?	?	?	?	?	?	?	?	?	?	?	?	?
103		Allosaurus	SMA 0005/02 "Big Al 2" complete with elongated and well-preserved root	Isolated	jimmadseni	C.H. Pers. obs.	Morrison Formation	Howe-Stephens Quarry	Wyoming	U.S.	Kimmeridgian	Late Jurassic	/	Isolated	20.19	13.52	45.3	52.16	0.669638	2.24368	17.14	11.5	0.670945	18.24	65.0307	0	absent	absent?	absent	absent	?	?	?	?	?	?	?	?	?	?	?	?	?
104		Allosaurus	SMA 0005/02 "Big Al 2" complete crown, no root	Isolated	jimmadseni	C.H. Pers. obs.	Morrison Formation	Howe-Stephens Quarry	Wyoming	U.S.	Kimmeridgian	Late Jurassic	/	Isolated	15.4	9.44	30.17	31.41	0.612987	1.95909	13.45	7.65	0.568773	?	?	0	absent	present, short	absent	absent	?	?	?	?	?	?	?	?	?	?	?	?	?
105		Allosaurus	SMA 0005/02 "Big Al 2" complete but badly preserved crown with upper part of root (end scapula)	Isolated	jimmadseni	C.H. Pers. obs.	Morrison Formation	Howe-Stephens Quarry	Wyoming	U.S.	Kimmeridgian	Late Jurassic	/	Isolated	16.36	9	30.16	36.18	0.550122	1.84352	11.91	6.56	0.550798	?	?	?	?	?	absent	absent	?	?	?	?	?	?	?	?	?	?	?	?	?
106		Allosaurus	SMA 0005/02 "Big Al 2" complete root, badly preserved crown broken tip	Isolated	jimmadseni	C.H. Pers. obs.	Morrison Formation	Howe-Stephens Quarry	Wyoming	U.S.	Kimmeridgian	Late Jurassic	/	Isolated	18.36	15.1	46.86	54.87	0.82244	2.55229	16.27	11.04	0.678549	18.96	65.4456	0	?	present, short	absent	absent	?	?	?	?	?	?	?	?	?	?	?	?	?
107		Allosaurus	SMA 0005/02 "Big Al 2" part of root and crown. Crown missing tip and root hollow	Isolated, Lpmx1?	jimmadseni	C.H. Pers. obs.	Morrison Formation	Howe-Stephens Quarry	Wyoming	U.S.	Kimmeridgian	Late Jurassic	/	Isolated, left pmx1?	16.55	15.2	?	?	0.918429	?	?	?	?	0?	?	?	present, large one	present, short	absent	absent	?	?	?	?	?	?	?	?	?	?	?	?	?
108		Allosaurus	SMA 0005/02 "Big Al 2" complete crown on large rock (G38/98 61)	Isolated	jimmadseni	C.H. Pers. obs.	Morrison Formation	Howe-Stephens Quarry	Wyoming	U.S.	Kimmeridgian	Late Jurassic	/	Isolated	20.5	?	34.2	40.82	?	1.66829	17.56	?	?	?	?	?	?	?	absent	absent	?	?	?	?	?	?	?	?	?	?	?	?	?
109		Allosaurus	NHFO 455 "Dracula"	Rpmx2	jimmadseni	C.H. Pers. obs.	Morrison Formation	Dana Quarry, Ten Sleep	Wyoming	U.S.	Kimmeridgian	Late Jurassic	Right	pmx2	?	?	44.44	46.57	?	?	11.62	?	?	?	?	1	large, very tenuous	absent	absent	absent	?	?	?	?	?	?	?	?	?	?	tip strongly worn out	?	?
110		Allosaurus	NHFO 455 "Dracula"	Rpmx3	jimmadseni	C.H. Pers. obs.	Morrison Formation	Dana Quarry, Ten Sleep	Wyoming	U.S.	Kimmeridgian	Late Jurassic	Right	pmx3	14.06	?	35.49	36.04	?	2.52418	13.34	?	?	?	?	2	very tenuous	absent	absent	absent	?	?	?	?	?	?	?	?	?	?	tip slightly worn out	?	?
111		Allosaurus	NHFO 455 "Dracula"	Rpmx4	jimmadseni	C.H. Pers. obs.	Morrison Formation	Dana Quarry, Ten Sleep	Wyoming	U.S.	Kimmeridgian	Late Jurassic	Right	pmx4	14.36	?	22.43	24.17	?	1.56198	10.5	?	?	?	?	2-3	visible	absent	absent	absent	?	?	?	?	?	?	?	?	?	?	tip slightly worn out, almost intact; unerupted tooth	?	?
112		Allosaurus	NHFO 455 "Dracula"	Rpmx5	jimmadseni	C.H. Pers. obs.	Morrison Formation	Dana Quarry, Ten Sleep	Wyoming	U.S.	Kimmeridgian	Late Jurassic	Right	pmx5	16.92	?	34.91	37.26	?	2.06324	12.77	?	?	?	?	2	very tenuous	absent	absent	absent	?	?	?	?	?	?	?	?	?	?	tip worn out	?	?
113		Allosaurus	NHFO 455 "Dracula"	Rmx1	jimmadseni	C.H. Pers. obs.	Morrison Formation	Dana Quarry, Ten Sleep	Wyoming	U.S.	Kimmeridgian	Late Jurassic	Right	mx1	16.3	9.18	35.22	39.67	?	2.16074	12.99	?	?	?	?	2	visible	D short-medium	absent	absent	?	?	?	?	?	?	?	?	?	?	Too badly preserved	?	?
114		Allosaurus	NHFO 455 "Dracula"	Rmx2	jimmadseni	C.H. Pers. obs.	Morrison Formation	Dana Quarry, Ten Sleep	Wyoming	U.S.	Kimmeridgian	Late Jurassic	Right	mx2	17.23	?	32.24	38.55	?	1.87115	14.24	?	?	?	?	2	very tenuous	D short-medium	absent	absent	?	?	?	?	?	?	?	?	?	?	apex weakly worn out, almost intact	?	?
115		Allosaurus	NHFO 455 "Dracula"	Rmx4	jimmadseni	C.H. Pers. obs.	Morrison Formation	Dana Quarry, Ten Sleep	Wyoming	U.S.	Kimmeridgian	Late Jurassic	Right	mx4	18.52	10.87	37.92	43.1	0.586933	2.04752	15.98	?	?	?	?	2-3	well-visible	D medium	absent	absent	?	?	?	?	?	?	?	?	?	?	missing tip; unknown	?	?
116		Allosaurus	NHFO 455 "Dracula"	Rmx6	jimmadseni	C.H. Pers. obs.	Morrison Formation	Dana Quarry, Ten Sleep	Wyoming	U.S.	Kimmeridgian	Late Jurassic	Right	mx6	17.95	11.34	40.75	46.65	0.631755	2.27019	16.44	?	?	?	?	2-3	visible	D medium	absent	absent	?	?	?	?	?	?	?	?	?	?	tip slightly worn out; almost intact	?	?
117		Allosaurus	NHFO 455 "Dracula"	Rmx7	jimmadseni	C.H. Pers. obs.	Morrison Formation	Dana Quarry, Ten Sleep	Wyoming	U.S.	Kimmeridgian	Late Jurassic	Right	mx7	19.18	?	45.18	51.92	?	2.35558	16.61	?	?	?	?	2-3	tenuous	D medium-long	absent	absent	?	?	?	?	?	?	?	?	?	?	Incomplete; unknown	?	?
118		Allosaurus	NHFO 455 "Dracula"	Rmx8	jimmadseni	C.H. Pers. obs.	Morrison Formation	Dana Quarry, Ten Sleep	Wyoming	U.S.	Kimmeridgian	Late Jurassic	Right	mx8	19.72	9.34	?	?	0.473631	?	?	?	?	?	?	2-3	visible	D medium-long	absent	absent	?	?	?	?	?	?	?	?	?	?	?	?	?
119		Allosaurus	NHFO 455 "Dracula"	Rmx10	jimmadseni	C.H. Pers. obs.	Morrison Formation	Dana Quarry, Ten Sleep	Wyoming	U.S.	Kimmeridgian	Late Jurassic	Right	mx10	18.27	?	?	?	?	?	?	?	?	?	?	3	visible	D medium	absent	absent	?	?	?	?	?	?	?	?	?	?	?	?	?
120		Allosaurus	NHFO 455 "Dracula"	Rmx11, not fully erupted	jimmadseni	C.H. Pers. obs.	Morrison Formation	Dana Quarry, Ten Sleep	Wyoming	U.S.	Kimmeridgian	Late Jurassic	Right	mx11	14.51	?	18.04	24.73	?	1.24328	11.56	?	?	?	?	3	visible	D short-medium	absent	absent	?	?	?	?	?	?	?	?	?	?	intact	?	?
121		Allosaurus	NHFO 455 "Dracula"	Rmx12	jimmadseni	C.H. Pers. obs.	Morrison Formation	Dana Quarry, Ten Sleep	Wyoming	U.S.	Kimmeridgian	Late Jurassic	Right	mx12	17.16	?	?	?	?	?	?	?	?	?	?	?	?	?	absent	absent	?	?	?	?	?	?	?	?	?	?	?	?	?
122		Allosaurus	NHFO 455 "Dracula"	Rmx13	jimmadseni	C.H. Pers. obs.	Morrison Formation	Dana Quarry, Ten Sleep	Wyoming	U.S.	Kimmeridgian	Late Jurassic	Right	mx13	14.16	?	20.62	26.75	?	1.45621	11.4	?	?	?	?	3-4	visible	D medium-long	absent	absent	?	?	?	?	?	?	?	?	?	?	intact	?	?
123		Allosaurus	NHFO 455 "Dracula"	Rmx14	jimmadseni	C.H. Pers. obs.	Morrison Formation	Dana Quarry, Ten Sleep	Wyoming	U.S.	Kimmeridgian	Late Jurassic	Right	mx14	12.09	?	16.33	21.08	?	1.3507	10.11	?	?	?	?	2	tenuous	D medium	absent	absent	?	?	?	?	?	?	?	?	?	?	missing tip but most likely intact	?	?
124		Allosaurus	NHFO 455 "Dracula"	Rmx15	jimmadseni	C.H. Pers. obs.	Morrison Formation	Dana Quarry, Ten Sleep	Wyoming	U.S.	Kimmeridgian	Late Jurassic	Right	mx15	11.52	?	13.48	17.97	?	1.17014	8.88	?	?	?	?	2-3	visible	short? to absent	absent	absent	?	?	?	?	?	?	?	?	?	?	almost intact	?	?
125		Allosaurus	NHFO 455 "Dracula"	Rmx16	jimmadseni	C.H. Pers. obs.	Morrison Formation	Dana Quarry, Ten Sleep	Wyoming	U.S.	Kimmeridgian	Late Jurassic	Right	mx16	9.44	?	13.88	18.03	?	1.47034	7.05	?	?	?	?	?	?	?	absent	absent	?	?	?	?	?	?	?	?	?	?	unknown	?	?
126		Allosaurus	NHFO 455 "Dracula"	L isolated max	jimmadseni	C.H. Pers. obs.	Morrison Formation	Dana Quarry, Ten Sleep	Wyoming	U.S.	Kimmeridgian	Late Jurassic	Left	Isolated max	17.26	10.57	36.98	41.41	0.612399	2.14253	14.88	7.81	?	?	?	3	very tenuous (labial side, important)	D medium	absent	absent	?	?	?	?	?	?	?	?	?	?	tip close to complete	?	?
127		Allosaurus	NHFO 455 "Dracula"	Rdt1	jimmadseni	C.H. Pers. obs.	Morrison Formation	Dana Quarry, Ten Sleep	Wyoming	U.S.	Kimmeridgian	Late Jurassic	Right	dt1	8.34	10.02	>18,7	>20,4	1.20144	?	~7,98	?	?	?	?	?	?	?	absent	absent	?	?	?	?	?	?	?	?	?	?	Incomplete; unknown	?	?
128		Allosaurus	NHFO 455 "Dracula"	Rdt3	jimmadseni	C.H. Pers. obs.	Morrison Formation	Dana Quarry, Ten Sleep	Wyoming	U.S.	Kimmeridgian	Late Jurassic	Right	dt3	11.7	11.03	>26,1	>23,32	0.942735	?	11.32	?	?	?	?	?	?	?	absent	absent	?	?	?	?	?	?	?	?	?	?	extremely worn out on lingual side	?	?
129		Allosaurus	NHFO 455 "Dracula"	Rdt4	jimmadseni	C.H. Pers. obs.	Morrison Formation	Dana Quarry, Ten Sleep	Wyoming	U.S.	Kimmeridgian	Late Jurassic	Right	dt4	10.75	6.54	>16,57	>15,79	0.608372	?	7.93	?	?	?	?	2	very tenuous	absent	absent	absent	?	?	?	?	?	?	?	?	?	?	tip worn out	?	?
130		Allosaurus	NHFO 455 "Dracula"	Rdt5	jimmadseni	C.H. Pers. obs.	Morrison Formation	Dana Quarry, Ten Sleep	Wyoming	U.S.	Kimmeridgian	Late Jurassic	Right	dt5	12.63	10.28	>28,32	>30,22	0.813935	?	10.57	?	?	?	?	2-3	very tenuous	D short-medium	absent	absent	?	?	?	?	?	?	?	?	?	?	Incomplete or extremely worn out?	?	?
131		Allosaurus	NHFO 455 "Dracula"	Rdt6	jimmadseni	C.H. Pers. obs.	Morrison Formation	Dana Quarry, Ten Sleep	Wyoming	U.S.	Kimmeridgian	Late Jurassic	Right	dt6	13.15	7.17	20.6	24.5	0.545247	1.56654	9.95	?	?	?	?	1	very tenuous	D short	absent	absent	?	?	?	?	?	?	?	?	?	?	Incomplete; unknown	?	?
132		Allosaurus	NHFO 455 "Dracula"	Rdt7	jimmadseni	C.H. Pers. obs.	Morrison Formation	Dana Quarry, Ten Sleep	Wyoming	U.S.	Kimmeridgian	Late Jurassic	Right	dt7	12.36	9.52	25.14	26.5	0.770227	2.03398	10.22	?	?	?	?	0	absent	D short	absent	absent	?	?	?	?	?	?	?	?	?	?	tip extremity worn out	?	?
133		Allosaurus	NHFO 455 "Dracula"	Rdt8	jimmadseni	C.H. Pers. obs.	Morrison Formation	Dana Quarry, Ten Sleep	Wyoming	U.S.	Kimmeridgian	Late Jurassic	Right	dt8	12.78	8.14	24.06	27.63	0.636933	1.88263	11.02	?	?	?	?	3	visible	D short-medium	absent	absent	?	?	?	?	?	?	?	?	?	?	tip extremity broken	?	?
134		Allosaurus	NHFO 455 "Dracula"	Rdt9	jimmadseni	C.H. Pers. obs.	Morrison Formation	Dana Quarry, Ten Sleep	Wyoming	U.S.	Kimmeridgian	Late Jurassic	Right	dt9	12.55	8.23	23.72	29.25	0.655777	1.89004	10.96	?	?	?	?	2	very tenuous	D short-medium	absent	absent	?	?	?	?	?	?	?	?	?	?	tip almost intact	?	?
135		Allosaurus	NHFO 455 "Dracula"	Rdt10	jimmadseni	C.H. Pers. obs.	Morrison Formation	Dana Quarry, Ten Sleep	Wyoming	U.S.	Kimmeridgian	Late Jurassic	Right	dt10	12.58	?	23.87	27.08	?	1.89746	11.28	?	?	?	?	2-3	tenuous	D short-medium	absent	absent	?	?	?	?	?	?	?	?	?	?	tip slightly worn out, almost intact	?	?
136		Allosaurus	NHFO 455 "Dracula"	Rdt12	jimmadseni	C.H. Pers. obs.	Morrison Formation	Dana Quarry, Ten Sleep	Wyoming	U.S.	Kimmeridgian	Late Jurassic	Right	dt12	13.65	?	?	?	?	?	?	?	?	?	?	?	?	?	absent	absent	?	?	?	?	?	?	?	?	?	?	Incomplete; unknown	?	?
137		Allosaurus	NHFO 455 "Dracula"	Rdt13	jimmadseni	C.H. Pers. obs.	Morrison Formation	Dana Quarry, Ten Sleep	Wyoming	U.S.	Kimmeridgian	Late Jurassic	Right	dt13	10.24	?	?	?	?	?	?	?	?	?	?	?	?	?	absent	absent	?	?	?	?	?	?	?	?	?	?	Incomplete; unknown	?	?
138		Allosaurus	NHFO 455 "Dracula"	Rdt15	jimmadseni	C.H. Pers. obs.	Morrison Formation	Dana Quarry, Ten Sleep	Wyoming	U.S.	Kimmeridgian	Late Jurassic	Right	dt15	12.06	?	10.19	?	?	0.844942	8.27	?	?	?	?	?	?	?	absent	absent	?	?	?	?	?	?	?	?	?	?	intact, not fully erupted?	?	?
139		Allosaurus	NHFO 455 "Dracula"	Rdt16	jimmadseni	C.H. Pers. obs.	Morrison Formation	Dana Quarry, Ten Sleep	Wyoming	U.S.	Kimmeridgian	Late Jurassic	Right	dt16	10.8	?	14.37	17.29	?	1.33056	9.42	?	?	?	?	0	absent	D short-medium	absent	absent	?	?	?	?	?	?	?	?	?	?	intact	?	?
140		Allosaurus	NHFO 455 "Dracula"	Rdt17	jimmadseni	C.H. Pers. obs.	Morrison Formation	Dana Quarry, Ten Sleep	Wyoming	U.S.	Kimmeridgian	Late Jurassic	Right	dt17	10.96	?	12.73	12.11	?	1.1615	7.79	?	?	?	?	0	absent	D short	absent	absent	?	?	?	?	?	?	?	?	?	?	Incomplete; probably intact	?	?
141		Allosaurus	NHFO 455 "Dracula"	Rdt18	jimmadseni	C.H. Pers. obs.	Morrison Formation	Dana Quarry, Ten Sleep	Wyoming	U.S.	Kimmeridgian	Late Jurassic	Right	dt18	8.23	4.06	10.37	12.07	0.493317	1.26002	7.39	?	?	?	?	0	absent	?	absent	absent	?	?	?	?	?	?	?	?	?	?	tip worn out	?	?
142		Allosaurus	NHFO 455 "Dracula"	Rdt19	jimmadseni	C.H. Pers. obs.	Morrison Formation	Dana Quarry, Ten Sleep	Wyoming	U.S.	Kimmeridgian	Late Jurassic	Right	dt19	6.97	?	?	?	?	?	?	?	?	?	?	?	?	?	absent	absent	?	?	?	?	?	?	?	?	?	?	Incomplete; unknown	?	?
143		Allosaurus	NHFO 455 "Dracula"	Lpmx1	jimmadseni	C.H. Pers. obs.	Morrison Formation	Dana Quarry, Ten Sleep	Wyoming	U.S.	Kimmeridgian	Late Jurassic	Left	pmx1	?	9.54	30.62	34.57	?	?	?	?	?	?	?	?	?	?	absent	absent	?	?	?	?	?	?	?	?	?	?	tip strongly worn out	?	?
144		Allosaurus	NHFO 455 "Dracula"	Lpmx2	jimmadseni	C.H. Pers. obs.	Morrison Formation	Dana Quarry, Ten Sleep	Wyoming	U.S.	Kimmeridgian	Late Jurassic	Left	pmx2	15.84	?	33.12	37.33	?	2.09091	?	?	?	?	?	?	?	?	absent	absent	?	?	?	?	?	?	?	?	?	?	tip damaged or strongly worn out	?	?
145		Allosaurus	NHFO 455 "Dracula"	Lpmx3	jimmadseni	C.H. Pers. obs.	Morrison Formation	Dana Quarry, Ten Sleep	Wyoming	U.S.	Kimmeridgian	Late Jurassic	Left	pmx3	15.06	?	36.09	41.46	?	2.39641	?	?	?	?	?	?	?	?	absent	absent	?	?	?	?	?	?	?	?	?	?	apex damaged or worn out	?	?
146		Allosaurus	NHFO 455 "Dracula"	Lpmx4	jimmadseni	C.H. Pers. obs.	Morrison Formation	Dana Quarry, Ten Sleep	Wyoming	U.S.	Kimmeridgian	Late Jurassic	Left	pmx4	?	?	34.65	?	?	?	?	?	?	?	?	?	?	?	absent	absent	?	?	?	?	?	?	?	?	?	?	tip of apex worn out, almost intact	?	?
147		Allosaurus	NHFO 455 "Dracula"	Ldt1	jimmadseni	C.H. Pers. obs.	Morrison Formation	Dana Quarry, Ten Sleep	Wyoming	U.S.	Kimmeridgian	Late Jurassic	Left	dt1	?	9.27	>23,1	>22,51	?	?	?	?	?	?	?	?	?	?	absent	absent	?	?	?	?	?	?	?	?	?	?	Incomplete; unknown	?	?
148		Allosaurus	NHFO 455 "Dracula"	Ldt2	jimmadseni	C.H. Pers. obs.	Morrison Formation	Dana Quarry, Ten Sleep	Wyoming	U.S.	Kimmeridgian	Late Jurassic	Left	dt2	12.73	?	>19,34	>20	?	?	?	?	?	?	?	?	?	?	absent	absent	?	?	?	?	?	?	?	?	?	?	extremely worn out	?	?
149		Allosaurus	NHFO 455 "Dracula"	Ldt3	jimmadseni	C.H. Pers. obs.	Morrison Formation	Dana Quarry, Ten Sleep	Wyoming	U.S.	Kimmeridgian	Late Jurassic	Left	dt3	9.43	?	26.03	29.14	?	2.76034	?	?	?	?	?	?	?	?	absent	absent	?	?	?	?	?	?	?	?	?	?	tip worn out	?	?
150		Allosaurus	NHFO 455 "Dracula"	Ldt4	jimmadseni	C.H. Pers. obs.	Morrison Formation	Dana Quarry, Ten Sleep	Wyoming	U.S.	Kimmeridgian	Late Jurassic	Left	dt4	13.77	?	10.69	14.46	?	0.776325	?	?	?	?	?	?	?	?	absent	absent	?	?	?	?	?	?	?	?	?	?	Incomplete; unknown	?	?
151		Allosaurus	NHFO 455 "Dracula"	Ldt5	jimmadseni	C.H. Pers. obs.	Morrison Formation	Dana Quarry, Ten Sleep	Wyoming	U.S.	Kimmeridgian	Late Jurassic	Left	dt5	14.55	?	22.98	24.65	?	1.57938	?	?	?	?	?	?	?	?	absent	absent	?	?	?	?	?	?	?	?	?	?	tip strongly worn out	?	?
152		Allosaurus	NHFO 455 "Dracula"	Ldt6	jimmadseni	C.H. Pers. obs.	Morrison Formation	Dana Quarry, Ten Sleep	Wyoming	U.S.	Kimmeridgian	Late Jurassic	Left	dt6	12.79	?	26.5	24.99	?	2.07193	?	?	?	?	?	?	?	?	absent	absent	?	?	?	?	?	?	?	?	?	?	intact (not fully erupted)	?	?
153		Allosaurus	NHFO 455 "Dracula"	Ldt7	jimmadseni	C.H. Pers. obs.	Morrison Formation	Dana Quarry, Ten Sleep	Wyoming	U.S.	Kimmeridgian	Late Jurassic	Left	dt7	12.47	?	?	?	?	?	?	?	?	?	?	?	?	?	absent	absent	?	?	?	?	?	?	?	?	?	?	tip slightly worn out	?	?
154		Allosaurus	NHFO 455 "Dracula"	Ldt8	jimmadseni	C.H. Pers. obs.	Morrison Formation	Dana Quarry, Ten Sleep	Wyoming	U.S.	Kimmeridgian	Late Jurassic	Left	dt8	13.94	?	?	?	?	?	?	?	?	?	?	?	?	?	absent	absent	?	?	?	?	?	?	?	?	?	?	tip slightly worn out	?	?
155		Allosaurus	NHFO 455 "Dracula"	Ldt9	jimmadseni	C.H. Pers. obs.	Morrison Formation	Dana Quarry, Ten Sleep	Wyoming	U.S.	Kimmeridgian	Late Jurassic	Left	dt9	12.82	?	22.24	25.82	?	1.73479	?	?	?	?	?	?	?	?	absent	absent	?	?	?	?	?	?	?	?	?	?	intact, shorter than others	?	?
156		Allosaurus	NHFO 455 "Dracula"	Ldt10	jimmadseni	C.H. Pers. obs.	Morrison Formation	Dana Quarry, Ten Sleep	Wyoming	U.S.	Kimmeridgian	Late Jurassic	Left	dt10	12.58	?	>17	>19,3	?	?	?	?	?	?	?	?	?	?	absent	absent	?	?	?	?	?	?	?	?	?	?	Incomplete; unknown	?	?
157		Allosaurus	NHFO 455 "Dracula"	Ldt11	jimmadseni	C.H. Pers. obs.	Morrison Formation	Dana Quarry, Ten Sleep	Wyoming	U.S.	Kimmeridgian	Late Jurassic	Left	dt11	13.14	?	>15,42	>19,07	?	?	?	?	?	?	?	?	?	?	absent	absent	?	?	?	?	?	?	?	?	?	?	Incomplete; unknown	?	?
158		Allosaurus	NHFO 455 "Dracula"	Ldt13	jimmadseni	C.H. Pers. obs.	Morrison Formation	Dana Quarry, Ten Sleep	Wyoming	U.S.	Kimmeridgian	Late Jurassic	Left	dt13	10.63	?	>10,18	>13,14	?	?	?	?	?	?	?	?	?	?	absent	absent	?	?	?	?	?	?	?	?	?	?	strongly worn out	?	?
159		Allosaurus	NHFO 455 "Dracula"	LIsolated mx2	jimmadseni	C.H. Pers. obs.	Morrison Formation	Dana Quarry, Ten Sleep	Wyoming	U.S.	Kimmeridgian	Late Jurassic	Left	Isolated mx2	18.51	?	35.51	36.93	?	1.91842	?	?	?	?	?	?	?	?	absent	absent	?	?	?	?	?	?	?	?	?	?	extremely worn out, half of tooth	?	?
160		Allosaurus	YPM 4944 (or 1333?)	Rpm02	fragilis	Smith et al., 2005	Morrison Formation	Emery County	Utah	U.S.	Kimmeridgian-Tithonian	Late Jurassic	Right	pm02	12.46	6	28.65	25.49	0.481541	2.29936	?	?	?	?	?	?	?	?	?	?	11.8	10	9.8	11.9	10	11	10.5	11	63.03	1	?	0.5	0.5
161		Allosaurus	YPM 4944 (or 1333?)	Rpm03	fragilis	Smith et al., 2005	Morrison Formation	Emery County	Utah	U.S.	Kimmeridgian-Tithonian	Late Jurassic	Right	pm03	12	11.07	20.69	25.59	0.9225	1.72417	?	?	?	?	?	?	?	?	?	?	11.8	10	13.7	11	10	12.8	11.8	11.3	46.7594	1	?	0.5	0.5
162		Allosaurus	YPM 4944 (or 1333?)	Rpm05	fragilis	Smith et al., 2005	Morrison Formation	Emery County	Utah	U.S.	Kimmeridgian-Tithonian	Late Jurassic	Right	pm05	13.04	9.28	26.98	30.39	0.711656	2.06902	?	?	?	?	?	?	?	?	?	?	12.6	10	15.7	12	11	17.7	12.8	13.6	73.3856	0.909091	?	0.5	0.454545
163		Allosaurus	YPM PU 14554 VIII A-153 (Adult specimen)	pmx1	fragilis	Measurements by Adé Ben-Salahuddin + C. H. Pers. obs.	Morrison Formation	Cleveland-Lloyd Dinosaur Quarry, Emery Co.	Utah	U.S.	Kimmeridgian-Tithonian	Late Jurassic	Left	pmx1	10.74	11.59	23.14	23.85	1.07914	2.15456	9.74	7.43	0.762834	0.61	97.4423	2-3	faint, present near edges of tooth	absent	absent	absent	?	?	?	?	?	?	?	?	?	?	tip extremity worn out, wear surface on lingual side	?	?
164		Allosaurus	YPM PU 14554 VIII A-153 (Adult specimen)	pmx2	fragilis	Measurements by Adé Ben-Salahuddin + C. H. Pers. obs.	Morrison Formation	Cleveland-Lloyd Dinosaur Quarry, Emery Co.	Utah	U.S.	Kimmeridgian-Tithonian	Late Jurassic	Left	pmx2	11.3	11.96	23.99	25.13	1.05841	2.12301	9.15	7	0.765027	0.44	98.2491	2-3	very faint	very fine and short	absent	absent	?	?	?	?	?	?	?	?	?	?	tip fully worn out, big wear surface on lingual side	?	?
165		Allosaurus	YPM PU 14554 VIII A-153 (Adult specimen)	pmx3	fragilis	Measurements by Adé Ben-Salahuddin + C. H. Pers. obs.	Morrison Formation	Cleveland-Lloyd Dinosaur Quarry, Emery Co.	Utah	U.S.	Kimmeridgian-Tithonian	Late Jurassic	Left	pmx3	11.19	10.52	?	?	0.940125	?	?	?	?	0	?	3-4	faint but present across entire crown	very fine and short	absent	absent	?	?	?	?	?	?	?	?	?	?	Incomplete; unknown	?	?
166		Allosaurus	YPM PU 14554 VIII A-153 (Adult specimen)	pmx4	fragilis	Measurements by Adé Ben-Salahuddin + C. H. Pers. obs.	Morrison Formation	Cleveland-Lloyd Dinosaur Quarry, Emery Co.	Utah	U.S.	Kimmeridgian-Tithonian	Late Jurassic	Left	pmx4	?	?	?	?	?	?	?	?	?	?	?	2-3	faint but present across entire crown	very fine and short	absent	absent	?	?	?	?	?	?	?	?	?	?	intact, not fully erupted	?	?
167		Allosaurus	YPM PU 14554 VIII A-153 (Adult specimen)	pmx5	fragilis	Measurements by Adé Ben-Salahuddin + C. H. Pers. obs.	Morrison Formation	Cleveland-Lloyd Dinosaur Quarry, Emery Co.	Utah	U.S.	Kimmeridgian-Tithonian	Late Jurassic	Left	pmx5	?	?	?	?	?	?	?	?	?	?	?	2-3	faint but present across entire preserved crown	absent	absent	absent	?	?	?	?	?	?	?	?	?	?	Incomplete; unknown	?	?
168		Allosaurus	YPM PU 14554 "YPM PU 14554" writen all the way round (Adult specimen)	pmx1	fragilis	Measurements by Adé Ben-Salahuddin + C. H. Pers. obs.	Morrison Formation	Cleveland-Lloyd Dinosaur Quarry, Emery Co.	Utah	U.S.	Kimmeridgian-Tithonian	Late Jurassic	Left	pmx1	14.11	15.46	31.63	32.07	1.09568	2.24167	11.49	11.49	1	?	?	?	hard to see/absent	?	absent	absent	?	?	?	?	?	?	?	?	?	?	tip extremity worn out, small wear surface on lingual side	?	?
169		Allosaurus	YPM PU 14554 "YPM PU 14554" writen all the way round (Adult specimen)	pmx2	fragilis	Measurements by Adé Ben-Salahuddin + C. H. Pers. obs.	Morrison Formation	Cleveland-Lloyd Dinosaur Quarry, Emery Co.	Utah	U.S.	Kimmeridgian-Tithonian	Late Jurassic	Left	pmx2	13.75	16.16	33.32	27.14	1.17527	2.42327	12.83	10.58	0.82463	0	100	2-3	faint but present across entire crown	?	absent	absent	?	?	?	?	?	?	?	?	?	?	tip slightly worn out	?	?
170		Allosaurus	YPM PU 14554 "YPM PU 14554" writen all the way round (Adult specimen)	pmx3	fragilis	Measurements by Adé Ben-Salahuddin + C. H. Pers. obs.	Morrison Formation	Cleveland-Lloyd Dinosaur Quarry, Emery Co.	Utah	U.S.	Kimmeridgian-Tithonian	Late Jurassic	Left	pmx3	14.93	14.91	?	?	0.99866	?	?	?	?	0	?	?	hard to see/absent	?	absent	absent	?	?	?	?	?	?	?	?	?	?	tip damaged or strongly worn out	?	?
171		Allosaurus	YPM PU 14554 "YPM PU 14554" writen all the way round (Adult specimen)	pmx4	fragilis	Measurements by Adé Ben-Salahuddin + C. H. Pers. obs.	Morrison Formation	Cleveland-Lloyd Dinosaur Quarry, Emery Co.	Utah	U.S.	Kimmeridgian-Tithonian	Late Jurassic	Left	pmx4	?	?	?	?	?	?	?	?	?	?	?	?	hard to see/absent	?	absent	absent	?	?	?	?	?	?	?	?	?	?	intact, not fully erupted	?	?
172		Allosaurus	YPM PU 14554 written "r. premaxilla" (Adult specimen)	pmx1	fragilis	Measurements by Adé Ben-Salahuddin + C. H. Pers. obs.	Morrison Formation	Cleveland-Lloyd Dinosaur Quarry, Emery Co.	Utah	U.S.	Kimmeridgian-Tithonian	Late Jurassic	Right	pmx1	15.89	15.68	39.26	37.22	0.986784	2.47074	12.73	10.57	0.830322	?	?	2-3	faint, visible on tooth base	?	absent	absent	?	?	?	?	?	?	?	?	?	?	tip slightly damaged, almost intact (tooth shorter than others)	?	?
173		Allosaurus	YPM PU 14554 written "r. premaxilla" (Adult specimen)	pmx2	fragilis	Measurements by Adé Ben-Salahuddin + C. H. Pers. obs.	Morrison Formation	Cleveland-Lloyd Dinosaur Quarry, Emery Co.	Utah	U.S.	Kimmeridgian-Tithonian	Late Jurassic	Right	pmx2	17.03	16.69	?	?	0.980035	?	?	?	?	0	?	?	hard to see/absent	?	absent	absent	?	?	?	?	?	?	?	?	?	?	Incomplete; unknown	?	?
174		Allosaurus	YPM PU 14554 written "r. premaxilla" (Adult specimen)	pmx3	fragilis	Measurements by Adé Ben-Salahuddin + C. H. Pers. obs.	Morrison Formation	Cleveland-Lloyd Dinosaur Quarry, Emery Co.	Utah	U.S.	Kimmeridgian-Tithonian	Late Jurassic	Right	pmx3	15.71	15.47	37.81	36.38	0.984723	2.40675	13.24	10.68	0.806647	0	100	?	hard to see/absent	?	absent	absent	?	?	?	?	?	?	?	?	?	?	tip strongly worn out, big wear facet on lingual side	?	?
175		Allosaurus	YPM PU 14554 written "r. premaxilla" (Adult specimen)	pmx5	fragilis	Measurements by Adé Ben-Salahuddin + C. H. Pers. obs.	Morrison Formation	Cleveland-Lloyd Dinosaur Quarry, Emery Co.	Utah	U.S.	Kimmeridgian-Tithonian	Late Jurassic	Right	pmx5 - reconstructed	15.69	12.64	36.19	36.48	0.805609	2.30656	13.66	9.88	0.72328	0	100	?	hard to see/absent	?	absent	absent	?	?	?	?	?	?	?	?	?	?	tip extremity worn out, almost intact	?	?
176		Allosaurus	YPM PU 14554 VIII A-054 (Adult specimen)	pmx1	fragilis	Measurements by Adé Ben-Salahuddin + C. H. Pers. obs.	Morrison Formation	Cleveland-Lloyd Dinosaur Quarry, Emery Co.	Utah	U.S.	Kimmeridgian-Tithonian	Late Jurassic	Right	pmx1	25.88	31.35	?	?	1.21136	?	?	?	?	0	?	2016-01-02	broadly spaced, only seen on lower portion of tooth	very short	absent	absent	?	?	?	?	?	?	?	?	?	?	tip strongly worn out, big wear facet on lingual side AND labial side!!!	?	?
177		Allosaurus	YPM PU 14554 VIII A-054 (Adult specimen)	pmx2	fragilis	Measurements by Adé Ben-Salahuddin + C. H. Pers. obs.	Morrison Formation	Cleveland-Lloyd Dinosaur Quarry, Emery Co.	Utah	U.S.	Kimmeridgian-Tithonian	Late Jurassic	Right	pmx2	?	31.45	?	?	?	?	?	?	?	0	?	?	hard to see/absent	very short	absent	absent	?	?	?	?	?	?	?	?	?	?	Incomplete; unknown	?	?
178		Allosaurus	YPM PU 14554 VIII A-054 (Adult specimen)	pmx3	fragilis	Measurements by Adé Ben-Salahuddin + C. H. Pers. obs.	Morrison Formation	Cleveland-Lloyd Dinosaur Quarry, Emery Co.	Utah	U.S.	Kimmeridgian-Tithonian	Late Jurassic	Right	pmx3	?	?	?	?	?	?	?	?	?	?	?	?	hard to see/absent	very fine and short	absent	absent	?	?	?	?	?	?	?	?	?	?	tip strongly worn out, big wear facet on lingual side	?	?
179		Allosaurus	YPM PU 14554 VIII A-054 (Adult specimen)	pmx4	fragilis	Measurements by Adé Ben-Salahuddin + C. H. Pers. obs.	Morrison Formation	Cleveland-Lloyd Dinosaur Quarry, Emery Co.	Utah	U.S.	Kimmeridgian-Tithonian	Late Jurassic	Right	pmx4	?	30.67	52.3	52.49	?	?	?	?	?	0	100	?	hard to see/absent	very short, almost absent	absent	absent	?	?	?	?	?	?	?	?	?	?	tip slightly worn out, small wear facet on lingual side	?	?
180		Allosaurus	YPM PU 14554 "PU 14554" written in black (Adult specimen)	mx1	fragilis	Measurements by Adé Ben-Salahuddin + C. H. Pers. obs.	Morrison Formation	Cleveland-Lloyd Dinosaur Quarry, Emery Co.	Utah	U.S.	Kimmeridgian-Tithonian	Late Jurassic	Left	mx1, reconstructed	?	?	?	41.38	?	?	?	?	?	?	?	?	hard to see/absent	?	absent	absent	?	?	?	?	?	?	?	?	?	?	tip broken?; unknown	?	?
181		Allosaurus	YPM PU 14554 "PU 14554" written in black (Adult specimen)	mx3	fragilis	Measurements by Adé Ben-Salahuddin + C. H. Pers. obs.	Morrison Formation	Cleveland-Lloyd Dinosaur Quarry, Emery Co.	Utah	U.S.	Kimmeridgian-Tithonian	Late Jurassic	Left	mx3	21.6	12.04	?	?	0.557407	?	?	?	?	?	?	?	hard to see/absent	absent	absent	absent	?	?	?	?	?	?	?	?	?	?	Incomplete; unknown	?	?
182		Allosaurus	YPM PU 14554 "PU 14554" written in black (Adult specimen)	mx4	fragilis	Measurements by Adé Ben-Salahuddin + C. H. Pers. obs.	Morrison Formation	Cleveland-Lloyd Dinosaur Quarry, Emery Co.	Utah	U.S.	Kimmeridgian-Tithonian	Late Jurassic	Left	mx4	?	?	?	?	0.485115	?	?	?	?	?	?	?	hard to see/absent	very short	absent	absent	?	?	?	?	?	?	?	?	?	?	Incomplete; unknown	?	?
183		Allosaurus	YPM PU 14554 "PU 14554" written in black (Adult specimen)	mx6	fragilis	Measurements by Adé Ben-Salahuddin + C. H. Pers. obs.	Morrison Formation	Cleveland-Lloyd Dinosaur Quarry, Emery Co.	Utah	U.S.	Kimmeridgian-Tithonian	Late Jurassic	Left	mx6	21.05	?	?	?	0.54492	?	?	?	?	0	?	?	hard to see/absent	very short, almost absent	absent	absent	?	?	?	?	?	?	?	?	?	?	Incomplete; unknown	?	?
184		Allosaurus	YPM PU 14554 "PU 14554" written in black (Adult specimen)	mx7	fragilis	Measurements by Adé Ben-Salahuddin + C. H. Pers. obs.	Morrison Formation	Cleveland-Lloyd Dinosaur Quarry, Emery Co.	Utah	U.S.	Kimmeridgian-Tithonian	Late Jurassic	Left	mx7	18.89	11.48	?	?	0.375143	?	?	?	?	0	?	?	hard to see/absent	?	absent	absent	?	?	?	?	?	?	?	?	?	?	Incomplete; unknown	?	?
185		Allosaurus	YPM PU 14554 "PU 14554" written in black (Adult specimen)	mx8	fragilis	Measurements by Adé Ben-Salahuddin + C. H. Pers. obs.	Morrison Formation	Cleveland-Lloyd Dinosaur Quarry, Emery Co.	Utah	U.S.	Kimmeridgian-Tithonian	Late Jurassic	Left	mx8	20.49	9.94	?	?	?	?	?	?	?	0	?	?	hard to see/absent	absent	absent	absent	?	?	?	?	?	?	?	?	?	?	Incomplete; unknown	?	?
186		Allosaurus	YPM PU 14554 "PU 14554" written in black (Adult specimen)	mx10	fragilis	Measurements by Adé Ben-Salahuddin + C. H. Pers. obs.	Morrison Formation	Cleveland-Lloyd Dinosaur Quarry, Emery Co.	Utah	U.S.	Kimmeridgian-Tithonian	Late Jurassic	Left	mx10	18.7	10.19	?	?	0.58641	?	?	?	?	?	?	?	hard to see/absent	?	absent	absent	?	?	?	?	?	?	?	?	?	?	Incomplete; unknown	?	?
187		Allosaurus	YPM PU 14554 "PU 14554" written in black (Adult specimen)	mx11	fragilis	Measurements by Adé Ben-Salahuddin + C. H. Pers. obs.	Morrison Formation	Cleveland-Lloyd Dinosaur Quarry, Emery Co.	Utah	U.S.	Kimmeridgian-Tithonian	Late Jurassic	Left	mx11	17.46	6.55	?	?	0.638095	?	?	?	?		?	?	hard to see/absent	?	absent	absent	?	?	?	?	?	?	?	?	?	?	Incomplete; unknown	?	?
188		Allosaurus	YPM PU 14554 erupted teeth displayed (Adult specimen)	mx1	fragilis	Measurements by Adé Ben-Salahuddin + C. H. Pers. obs.	Morrison Formation	Cleveland-Lloyd Dinosaur Quarry, Emery Co.	Utah	U.S.	Kimmeridgian-Tithonian	Late Jurassic	Right	mx1	?	12.13	40.76	54.8	?	?	14.5	9.25	0.637931	?	?	?	hard to see/absent	very short, almost absent	absent	absent	?	?	?	?	?	?	?	?	?	?	Incomplete; unknown	?	?
189		Allosaurus	YPM PU 14554 erupted teeth displayed (Adult specimen)	mx2	fragilis	Measurements by Adé Ben-Salahuddin + C. H. Pers. obs.	Morrison Formation	Cleveland-Lloyd Dinosaur Quarry, Emery Co.	Utah	U.S.	Kimmeridgian-Tithonian	Late Jurassic	Right	mx2	18.69	10.96	37.66	54.82	0.58641	2.01498	13.62	7.85	0.576358	0	100	1	broadly spaced, hard to see	very short, almost absent	absent	absent	?	?	?	?	?	?	?	?	?	?	intact, denticles crossing tip	?	?
190		Allosaurus	YPM PU 14554 erupted teeth displayed (Adult specimen)	mx3	fragilis	Measurements by Adé Ben-Salahuddin + C. H. Pers. obs.	Morrison Formation	Cleveland-Lloyd Dinosaur Quarry, Emery Co.	Utah	U.S.	Kimmeridgian-Tithonian	Late Jurassic	Right	mx3	18.9	12.06	44.47	55	0.638095	2.35291	17.25	7.75	0.449275	?	?	2016-01-02	broadly spaced, hard to see	very short, almost absent	absent	absent	?	?	?	?	?	?	?	?	?	?	tip worn out	?	?
191		Allosaurus	YPM PU 14554 erupted teeth displayed (Adult specimen)	mx4	fragilis	Measurements by Adé Ben-Salahuddin + C. H. Pers. obs.	Morrison Formation	Cleveland-Lloyd Dinosaur Quarry, Emery Co.	Utah	U.S.	Kimmeridgian-Tithonian	Late Jurassic	Right	mx4	19.49	10.74	40.77	47.12	0.551052	2.09184	16.15	7.23	0.447678	0	100	1	broadly spaced, hard to see	very short, almost absent	absent	absent	?	?	?	?	?	?	?	?	?	?	tip extremity worn out, almost intact; small wear facet on lingual side	?	?
192		Allosaurus	YPM PU 14554 erupted teeth displayed (Adult specimen)	mx6	fragilis	Measurements by Adé Ben-Salahuddin + C. H. Pers. obs.	Morrison Formation	Cleveland-Lloyd Dinosaur Quarry, Emery Co.	Utah	U.S.	Kimmeridgian-Tithonian	Late Jurassic	Right	mx6	20.27	9.72	42.13	44.3	0.479526	2.07844	15.8	7.57	0.479114	0	100	2016-01-02	broadly spaced, hard to see	very short, almost absent	absent	absent	?	?	?	?	?	?	?	?	?	?	tip extremity worn out, almost intact	?	?
193		Allosaurus	YPM PU 14554 erupted teeth displayed (Adult specimen)	mx8	fragilis	Measurements by Adé Ben-Salahuddin + C. H. Pers. obs.	Morrison Formation	Cleveland-Lloyd Dinosaur Quarry, Emery Co.	Utah	U.S.	Kimmeridgian-Tithonian	Late Jurassic	Right	mx8	19.34	9.68	36.1	39.65	0.500517	1.8666	15.97	7.67	0.480276	0	100	2016-01-02	broadly spaced, faint but present	very short, almost absent	absent	absent	?	?	?	?	?	?	?	?	?	?	tip worn out, missing enamel as well?	?	?
194		Allosaurus	YPM PU 14554 erupted teeth displayed (Adult specimen)	mx10	fragilis	Measurements by Adé Ben-Salahuddin + C. H. Pers. obs.	Morrison Formation	Cleveland-Lloyd Dinosaur Quarry, Emery Co.	Utah	U.S.	Kimmeridgian-Tithonian	Late Jurassic	Right	mx10	17.59	8.81	?	?	0.500853	?	?	?	?	?	?	?	hard to see/absent	very short, almost absent	absent	absent	?	?	?	?	?	?	?	?	?	?	Incomplete; unknown	?	?
195		Allosaurus	YPM PU 14554-9 (Adult specimen)	dt4	fragilis	Measurements by Adé Ben-Salahuddin + C. H. Pers. obs.	Morrison Formation	Cleveland-Lloyd Dinosaur Quarry, Emery Co.	Utah	U.S.	Kimmeridgian-Tithonian	Late Jurassic	Left	dt4	12.59	12.22	26.36	35.72	0.970612	2.15712	10.27	6.98	0.679649	?	?	?	hard to see/absent	?	absent	absent	?	?	?	?	?	?	?	?	?	?	tip worn out	?	?
196		Allosaurus	YPM PU 14554-9 (Adult specimen)	dt5	fragilis	Measurements by Adé Ben-Salahuddin + C. H. Pers. obs.	Morrison Formation	Cleveland-Lloyd Dinosaur Quarry, Emery Co.	Utah	U.S.	Kimmeridgian-Tithonian	Late Jurassic	Left	dt5	12.94	13.57	26.62	27.91	1.04869	1.96168	10.85	7.89	0.727189		100	2-3	faintly present on lingual surface	?	absent	absent	?	?	?	?	?	?	?	?	?	?	tip strongly damaged	?	?
197		Allosaurus	YPM PU 14554-9 (Adult specimen)	dt9	fragilis	Measurements by Adé Ben-Salahuddin + C. H. Pers. obs.	Morrison Formation	Cleveland-Lloyd Dinosaur Quarry, Emery Co.	Utah	U.S.	Kimmeridgian-Tithonian	Late Jurassic	Left	dt9	14.68	10.8	34.74	27.38	0.735695	3.21667	12.25	7.14	0.582857		100	?	hard to see/absent	?	absent	absent	?	?	?	?	?	?	?	?	?	?	tip worn out	?	?
198		Allosaurus	YPM PU 14554-9 (Adult specimen)	dt10	fragilis	Measurements by Adé Ben-Salahuddin + C. H. Pers. obs.	Morrison Formation	Cleveland-Lloyd Dinosaur Quarry, Emery Co.	Utah	U.S.	Kimmeridgian-Tithonian	Late Jurassic	Left	dt10	14.3	9.24	26.4	20.79	0.646154	2.85714	9.71	5.54	0.570546	?	?	1-2	faintly present on lingual surface	?	absent	absent	?	?	?	?	?	?	?	?	?	?	tip extremity worn out, not fully erupted	?	?
199		Allosaurus	YPM PU 14554-9 (Adult specimen)	dt14	fragilis	Measurements by Adé Ben-Salahuddin + C. H. Pers. obs.	Morrison Formation	Cleveland-Lloyd Dinosaur Quarry, Emery Co.	Utah	U.S.	Kimmeridgian-Tithonian	Late Jurassic	Left	dt14	?	?	?	?	?	?	?	?	?		?	?	hard to see/absent	?	absent	absent	?	?	?	?	?	?	?	?	?	?	tip extremity worn out?	?	?
200		Allosaurus	YPM PU 14554-8 written "(rt. dentary)" (Adult specimen)	dt3	fragilis	Measurements by Adé Ben-Salahuddin + C. H. Pers. obs.	Morrison Formation	Cleveland-Lloyd Dinosaur Quarry, Emery Co.	Utah	U.S.	Kimmeridgian-Tithonian	Late Jurassic	Right	dt3	14.69	14.37	31.78	30.88	0.978216	2.21155	12.05	8.27	0.686307		100	?	hard to see/absent	?	absent	absent	?	?	?	?	?	?	?	?	?	?	tip worn out	?	?
201		Allosaurus	YPM PU 14554-8 written "(rt. dentary)" (Adult specimen)	dt4	fragilis	Measurements by Adé Ben-Salahuddin + C. H. Pers. obs.	Morrison Formation	Cleveland-Lloyd Dinosaur Quarry, Emery Co.	Utah	U.S.	Kimmeridgian-Tithonian	Late Jurassic	Right	dt4	?	?	?	?	?	?	?	?	?		?	?	hard to see/absent	?	absent	absent	?	?	?	?	?	?	?	?	?	?	tip missing; unknown	?	?
202		Allosaurus	YPM PU 14554 VII 3 (Adult specimen)	dt7	fragilis	Measurements by Adé Ben-Salahuddin + C. H. Pers. obs.	Morrison Formation	Cleveland-Lloyd Dinosaur Quarry, Emery Co.	Utah	U.S.	Kimmeridgian-Tithonian	Late Jurassic	Right	dt7	?	?	?	?	?	?	?	?	?	?	?	2-3	faintly present on lingual surface	?	absent	absent	?	?	?	?	?	?	?	?	?	?	tip missing; unknown	?	?
203		Allosaurus	YPM PU 14554 VII 3 (Adult specimen)	dt8	fragilis	Measurements by Adé Ben-Salahuddin + C. H. Pers. obs.	Morrison Formation	Cleveland-Lloyd Dinosaur Quarry, Emery Co.	Utah	U.S.	Kimmeridgian-Tithonian	Late Jurassic	Right	dt8	14.53	10.32	33.72	30.72	0.710255	3.26744	11.4	6.66	0.584211		100	3	faintly present on lingual surface	?	absent	absent	?	?	?	?	?	?	?	?	?	?	tip worn out	?	?
204		Allosaurus	YPM PU 14554 VII 3 (Adult specimen)	dt9	fragilis	Measurements by Adé Ben-Salahuddin + C. H. Pers. obs.	Morrison Formation	Cleveland-Lloyd Dinosaur Quarry, Emery Co.	Utah	U.S.	Kimmeridgian-Tithonian	Late Jurassic	Right	dt9	14.72	9.48	30.41	26.05	0.644022	3.20781	12.55	6.99	0.556972		100	2-3	faintly present on lingual surface	?	absent	absent	?	?	?	?	?	?	?	?	?	?	tip extremity worn out	?	?
205		Allosaurus	YPM PU 14554 VII 3 (Adult specimen)	dt12	fragilis	Measurements by Adé Ben-Salahuddin + C. H. Pers. obs.	Morrison Formation	Cleveland-Lloyd Dinosaur Quarry, Emery Co.	Utah	U.S.	Kimmeridgian-Tithonian	Late Jurassic	Right	dt12	13.09	7.74	26.03	19.8	0.591291	3.36305	10.32	5.11	0.495155		100	2-3	faintly present on lingual surface, tooth tip	?	absent	absent	?	?	?	?	?	?	?	?	?	?	unknown	?	?
206		Allosaurus	YPM PU 14554 VII 3 (Adult specimen)	dt14	fragilis	Measurements by Adé Ben-Salahuddin + C. H. Pers. obs.	Morrison Formation	Cleveland-Lloyd Dinosaur Quarry, Emery Co.	Utah	U.S.	Kimmeridgian-Tithonian	Late Jurassic	Right	dt14	13.5	6.5	?	?	0.481481	?	?	?	?		?	?	hard to see/absent	?	absent	absent	?	?	?	?	?	?	?	?	?	?	tip missing, unknow	?	?
207		Allosaurus	YPM PU 14554 109 III A (Juvenile specimen)	mx2	fragilis	Measurements by Adé Ben-Salahuddin + C. H. Pers. obs.	Morrison Formation	Cleveland-Lloyd Dinosaur Quarry, Emery Co.	Utah	U.S.	Kimmeridgian-Tithonian	Late Jurassic	Left	mx2	11.94	6.19	26.99	24.09	0.518425	4.36026	9.61	3.86	0.401665		100	?	hard to see/absent	?	absent	absent	?	?	?	?	?	?	?	?	?	?	tip almost intact	?	?
208		Allosaurus	YPM PU 14554 109 III A (Juvenile specimen)	mx3	fragilis	Measurements by Adé Ben-Salahuddin + C. H. Pers. obs.	Morrison Formation	Cleveland-Lloyd Dinosaur Quarry, Emery Co.	Utah	U.S.	Kimmeridgian-Tithonian	Late Jurassic	Left	mx3	12.14	6.78	29.72	23.41	0.558484	4.38348	10.62	5.39	0.507533		100	?	hard to see/absent	?	absent	absent	?	?	?	?	?	?	?	?	?	?	unknown	?	?
209		Allosaurus	YPM PU 14554 109 III A (Juvenile specimen)	mx4	fragilis	Measurements by Adé Ben-Salahuddin + C. H. Pers. obs.	Morrison Formation	Cleveland-Lloyd Dinosaur Quarry, Emery Co.	Utah	U.S.	Kimmeridgian-Tithonian	Late Jurassic	Left	mx4	13.1	5.66	25.98	22.29	0.432061	4.59011	10.31	4.51	0.437439		100	?	hard to see/absent	?	absent	absent	?	?	?	?	?	?	?	?	?	?	unknown	?	?
210		Allosaurus	YPM PU 14554 109 III A (Juvenile specimen)	mx5	fragilis	Measurements by Adé Ben-Salahuddin + C. H. Pers. obs.	Morrison Formation	Cleveland-Lloyd Dinosaur Quarry, Emery Co.	Utah	U.S.	Kimmeridgian-Tithonian	Late Jurassic	Left	mx5	13.2	6.49	27.29	22.88	0.491667	4.20493	12.85	5.94	0.462257		100	?	hard to see/absent	?	absent	absent	?	?	?	?	?	?	?	?	?	?	unknown	?	?
211		Allosaurus	YPM PU 14554 109 III A (Juvenile specimen)	mx6	fragilis	Measurements by Adé Ben-Salahuddin + C. H. Pers. obs.	Morrison Formation	Cleveland-Lloyd Dinosaur Quarry, Emery Co.	Utah	U.S.	Kimmeridgian-Tithonian	Late Jurassic	Left	mx6	13.23	?	28.06	24.81	?	?	10.52	4.58	0.435361		100	?	hard to see/absent	?	absent	absent	?	?	?	?	?	?	?	?	?	?	unknown	?	?
212		Allosaurus	YPM PU 14554 109 III A (Juvenile specimen)	mx7	fragilis	Measurements by Adé Ben-Salahuddin + C. H. Pers. obs.	Morrison Formation	Cleveland-Lloyd Dinosaur Quarry, Emery Co.	Utah	U.S.	Kimmeridgian-Tithonian	Late Jurassic	Left	mx7	12.25	6.42	25.47	22.96	0.524082	3.96729	10.67	4.82	0.451734		100	1-2	faintly present on labial surface, tooth tip	?	absent	absent	?	?	?	?	?	?	?	?	?	?	tip extremity worn out, almost intact	?	?
213		Allosaurus	YPM PU 14554 109 III A (Juvenile specimen)	mx8	fragilis	Measurements by Adé Ben-Salahuddin + C. H. Pers. obs.	Morrison Formation	Cleveland-Lloyd Dinosaur Quarry, Emery Co.	Utah	U.S.	Kimmeridgian-Tithonian	Late Jurassic	Left	mx8	12.47	5.57	?	?	0.446672	?	?	?	?		?	2-3	faintly present on lingual surface, tooth base	?	absent	absent	?	?	?	?	?	?	?	?	?	?	unknown	?	?
214		Allosaurus	YPM PU 14554 109 III A (Juvenile specimen)	mx9	fragilis	Measurements by Adé Ben-Salahuddin + C. H. Pers. obs.	Morrison Formation	Cleveland-Lloyd Dinosaur Quarry, Emery Co.	Utah	U.S.	Kimmeridgian-Tithonian	Late Jurassic	Left	mx9, reconstructed	11.85	5.89	24.43	18.46	0.497046	4.14771	9.99	4.61	0.461461		100	2-3	faintly present on labial surface, tooth tip	?	absent	absent	?	?	?	?	?	?	?	?	?	?	tip extremity worn out, almost intact	?	?
215		Allosaurus	YPM PU 14554 109 III A (Juvenile specimen)	mx10	fragilis	Measurements by Adé Ben-Salahuddin + C. H. Pers. obs.	Morrison Formation	Cleveland-Lloyd Dinosaur Quarry, Emery Co.	Utah	U.S.	Kimmeridgian-Tithonian	Late Jurassic	Left	mx10	12.48	4.51	?	?	0.361378	?	?	?	?		?	3-4	faintly present on labial surface, tooth tip	?	absent	absent	?	?	?	?	?	?	?	?	?	?	missing tip, unknown	?	?
216		Allosaurus	YPM PU 14554 72-1 (Juvenile specimen)	dt1	fragilis	Measurements by Adé Ben-Salahuddin + C. H. Pers. obs.	Morrison Formation	Cleveland-Lloyd Dinosaur Quarry, Emery Co.	Utah	U.S.	Kimmeridgian-Tithonian	Late Jurassic	Left	dt1	7.62	8.57	15.84	15.68	1.12467	1.84831	7.09	5.93	?		100	1-2	faintly present on lingual surface, tooth tip	?	absent	absent	?	?	?	?	?	?	?	?	?	?	unknown	?	?
217		Allosaurus	YPM PU 14554 72-1 (Juvenile specimen)	dt5	fragilis	Measurements by Adé Ben-Salahuddin + C. H. Pers. obs.	Morrison Formation	Cleveland-Lloyd Dinosaur Quarry, Emery Co.	Utah	U.S.	Kimmeridgian-Tithonian	Late Jurassic	Left	dt5	10.62	7.6	23.36	20.39	0.715631	3.07368	9.94	5.77	0.580483		100	1-2	faintly present on lingual surface, tooth tip	?	absent	absent	?	?	?	?	?	?	?	?	?	?	tip worn out	?	?
218		Allosaurus	YPM PU 14554 72-1 (Juvenile specimen)	dt6	fragilis	Measurements by Adé Ben-Salahuddin + C. H. Pers. obs.	Morrison Formation	Cleveland-Lloyd Dinosaur Quarry, Emery Co.	Utah	U.S.	Kimmeridgian-Tithonian	Late Jurassic	Left	dt6	10.48	6.85	22.84	20.01	0.653626	3.33431	8.79	4.62	0.525597		100	?	hard to see/absent	?	absent	absent	?	?	?	?	?	?	?	?	?	?	tip extremity worn out, almost intact	?	?
219		Allosaurus	YPM PU 14554 72-1 (Juvenile specimen)	dt8	fragilis	Measurements by Adé Ben-Salahuddin + C. H. Pers. obs.	Morrison Formation	Cleveland-Lloyd Dinosaur Quarry, Emery Co.	Utah	U.S.	Kimmeridgian-Tithonian	Late Jurassic	Left	dt8	10.84	6.67	23.57	19.31	0.615314	3.53373	7.93	4.6	0.580076		100	2-3	faintly present on lingual surface	?	absent	absent	?	?	?	?	?	?	?	?	?	?	tip damaged or worn out	?	?
220		Allosaurus	YPM PU 14554 72-1 (Juvenile specimen)	dt9	fragilis	Measurements by Adé Ben-Salahuddin + C. H. Pers. obs.	Morrison Formation	Cleveland-Lloyd Dinosaur Quarry, Emery Co.	Utah	U.S.	Kimmeridgian-Tithonian	Late Jurassic	Left	dt9	10.9	6	21.01	18.66	0.550459	3.50167	7.73	3.83	0.495472		100	2-3	faintly present on lingual surface	?	absent	absent	?	?	?	?	?	?	?	?	?	?	tip extremity worn out, almost intact	?	?
221		Allosaurus	YPM PU 14554 72-1 (Juvenile specimen)	dt10	fragilis	Measurements by Adé Ben-Salahuddin + C. H. Pers. obs.	Morrison Formation	Cleveland-Lloyd Dinosaur Quarry, Emery Co.	Utah	U.S.	Kimmeridgian-Tithonian	Late Jurassic	Left	dt10	10.38	6.02	?	?	0.579961	?	?	?	?		?	2-3	faintly present on lingual surface	?	absent	absent	?	?	?	?	?	?	?	?	?	?	tip extremely worn out	?	?
222		Allosaurus	YPM PU 14554 72-1 (Juvenile specimen)	dt11	fragilis	Measurements by Adé Ben-Salahuddin + C. H. Pers. obs.	Morrison Formation	Cleveland-Lloyd Dinosaur Quarry, Emery Co.	Utah	U.S.	Kimmeridgian-Tithonian	Late Jurassic	Left	dt11	11.18	5.61	19.48	15.51	0.501789	3.47237	7.49	4.03	0.538051		100	?	hard to see/absent	?	absent	absent	?	?	?	?	?	?	?	?	?	?	unknown	?	?
223		Allosaurus	SDSM 25248	Lpm03	fragilis	Smith et al., 2005	Morrison Formation	Little Houston Quarry (Unit 2)	Wyoming	U.S.	Kimmeridgian-Tithonian	Late Jurassic	Left	pm03	20.36	12.29	49.57	54	0.603635	2.43468	?	?	?	?	?	?	?	?	?	?	10	9	11	10	9	12	10	10.3	102.114	1	?	0.555556	0.555556
224		Allosaurus	SDSM 25248	Lpm05	fragilis	Smith et al., 2005	Morrison Formation	Little Houston Quarry (Unit 2)	Wyoming	U.S.	Kimmeridgian-Tithonian	Late Jurassic	Left	pm05	16.01	8.23	34.05	39.74	0.514054	2.1268	?	?	?	?	?	?	?	?	?	?	13	16	24	14	12.5	15	17.7	13.8	93.978	1.28	?	0.3125	0.4
225		Allosaurus	UMNH VP 6499	Lpmx2	fragilis	C.H. Pers. obs.	Morrison Formation	Cleveland-Lloyd Dinosaur Quarry, Emery Co.	Utah	U.S.	Kimmeridgian-Tithonian	Late Jurassic	Left	pmx2	16.75	15.89	38.35	39.57	0.948657	2.28955	13.39	11.7	0.873786	0	100	2	very tenous on labial side	MC short, DC medium on lingual	absent	absent	8.75	9.5	11.66	9.5	9.5	15	9.97	11.33	86.9011	1	tip slightly worn out + extensive wear facet on lingual side	0.526316	0.526316
226		Allosaurus	UMNH VP 6499	Lpmx3	fragilis	C.H. Pers. obs.	Morrison Formation	Cleveland-Lloyd Dinosaur Quarry, Emery Co.	Utah	U.S.	Kimmeridgian-Tithonian	Late Jurassic	Left	pmx3	16.74	14.27	35.93	38.68	0.852449	2.14636	14.6	10.48	0.717808	0	100	2	very tenous on labial side	DC short on labial, MC absent	absent	absent	?	8.33	14.5	?	10	11	11.45	10.5	75.453	0.833	Tip missing + extensive wear facet on lingual side	0.60024	0.5
227		Allosaurus	UMNH VP 6499	Lpmx4	fragilis	C.H. Pers. obs.	Morrison Formation	Cleveland-Lloyd Dinosaur Quarry, Emery Co.	Utah	U.S.	Kimmeridgian-Tithonian	Late Jurassic	Left	pmx4	16.96	15.28	43.95	39.1	0.900943	2.59139	16.43	11.76	0.715764	0	100	3	very tenous on labial side	MC absent, DC medium to well-developped on lingual	absent	absent	?	9	13.75	?	10	10.5	11.37	10.25	90.0975	0.9	Incomplete; unknown	0.555556	0.5
228		Allosaurus	UMNH VP 20687	Lpmx4	fragilis	C.H. Pers. obs.	Morrison Formation	Cleveland-Lloyd Dinosaur Quarry, Emery Co.	Utah	U.S.	Kimmeridgian-Tithonian	Late Jurassic	Left	pmx4	16.4	14.76	39.52	39.29	0.9	2.40976	15.1	11.75	0.778146	0	100	2	well-visible on the root in lingual	DC medium on lingual side	absent	absent	?	11.25	12	10.62	10.62	13.33	11.625	11.52	91.0541	1.05932	tip worn out	0.444444	0.47081
229		Allosaurus	UMNH VP 1251	Rpmx3	fragilis	C.H. Pers. obs.	Morrison Formation	Cleveland-Lloyd Dinosaur Quarry, Emery Co.	Utah	U.S.	Kimmeridgian-Tithonian	Late Jurassic	Right	pmx3	17.02	15.31	>35,27	>33,03	0.89953	?	?	?	?	0	100	3	well-visible on the root in lingual	DC short to absent	absent	absent	?	?	?	?	?	?	?	?	?	?	Rpmx3 strongly worn out	?	?
230		Allosaurus	UMNH VP 1251	Rpmx5	fragilis	C.H. Pers. obs.	Morrison Formation	Cleveland-Lloyd Dinosaur Quarry, Emery Co.	Utah	U.S.	Kimmeridgian-Tithonian	Late Jurassic	Right	pmx5	16.27	14.81	>21,33	>22,24	0.910264	?	?	?	?	0	100	3	marked on root in lingual	DC medium	absent	absent	?	?	?	?	?	?	?	?	?	?	Incomplete; unknown	?	?
231		Allosaurus	UMNH VP 10393 (juvenile)	Rpmx4	fragilis	C.H. Pers. obs.	Morrison Formation	Cleveland-Lloyd Dinosaur Quarry, Emery Co.	Utah	U.S.	Kimmeridgian-Tithonian	Late Jurassic	Right	pmx4	10.47	8.88	27.23	28.67	0.848138	2.60076	9.34	7.05	0.754818	0	100	0	absent	DC short on lingual, medium to well-developped on labial	absent	absent	13	10.83	13.75	12.5	10.5	13.75	13	12.5	68.075	1.03143	tip worn out	0.461681	0.47619
232		Allosaurus	UMNH VP 9369	Rdt6	fragilis	C.H. Pers. obs.	Morrison Formation	Cleveland-Lloyd Dinosaur Quarry, Emery Co.	Utah	U.S.	Kimmeridgian-Tithonian	Late Jurassic	Right	dt6	11.52	8.42	25.69	28.54	0.730903	2.23003	10.4	5.98	0.575	close to root	100?	2	visible with light on labial side	DC short to medium, M absent	absent	absent	?	16.25	?	13.75	13.75	17.5	16.25	15	77.07	1.18182	intact (dt7 and 8; missing; unknown)	0.307692	0.363636
233		Allosaurus	UMNH VP 6475 (juvenile)	Ldt1	fragilis	C.H. Pers. obs.	Morrison Formation	Cleveland-Lloyd Dinosaur Quarry, Emery Co.	Utah	U.S.	Kimmeridgian-Tithonian	Late Jurassic	Left	dt1	5.47	6.39	12.27	11.9	1.16819	2.24314	5.36	4.3	0.802239	0	100	0	absent	DC short	absent	absent	?	12.5	?	?	13	15.5	12.5	14.25	34.9695	0.961538	tip worn out	0.4	0.384615
234		Allosaurus	UMNH VP 6475 (juvenile)	Ldt4	fragilis	C.H. Pers. obs.	Morrison Formation	Cleveland-Lloyd Dinosaur Quarry, Emery Co.	Utah	U.S.	Kimmeridgian-Tithonian	Late Jurassic	Left	dt4	7.74	6.07	19.1	19.03	0.784238	2.4677	6.91	4.48	0.648336	0	100	2 or 3	very tenous on labial side	DC short	absent	absent	17.5	15	?	14.5	13.5	19.16	16.25	15.72	60.0504	1.11111	tip worn out, almost intact	0.333333	0.37037
235		Allosaurus	UMNH VP 9351	Rdt2	fragilis	C.H. Pers. obs.	Morrison Formation	Cleveland-Lloyd Dinosaur Quarry, Emery Co.	Utah	U.S.	Kimmeridgian-Tithonian	Late Jurassic	Right	dt2	12.75	11.8	23.25	25.22	0.92549	1.82353	10.38	7.56	0.728324	0	100	?	?	?	absent	absent	?	11	?	?	10	11	11	10.5	48.825	1.1	Incomplete; unknown	0.454545	0.5
236		Allosaurus	UMNH VP 9351	Rdt4	fragilis	C.H. Pers. obs.	Morrison Formation	Cleveland-Lloyd Dinosaur Quarry, Emery Co.	Utah	U.S.	Kimmeridgian-Tithonian	Late Jurassic	Right	dt4	14.13	13.29	30.83	37.68	0.940552	2.18188	12.61	8.3	0.658208	0	100	?	?	?	absent	absent	12.5	11.25	20	11.25	10	?	14.58	10.625	65.5138	1.125	tip extremity worn out, almost intact	0.444444	0.5
237		Allosaurus	UMNH VP 9351	Rdt6	fragilis	C.H. Pers. obs.	Morrison Formation	Cleveland-Lloyd Dinosaur Quarry, Emery Co.	Utah	U.S.	Kimmeridgian-Tithonian	Late Jurassic	Right	dt6	14.68	11.23	29.2	32.24	0.764986	1.9891	13.33	8.65	0.648912	0	100	?	?	?	absent	absent	12.5	10.62	17.5	12.5	11.66	18	13.54	14.05	82.052	0.910806	tip missing; worn out??	0.47081	0.428816
238		Allosaurus	UMNH VP 9351	Rdt7	fragilis	C.H. Pers. obs.	Morrison Formation	Cleveland-Lloyd Dinosaur Quarry, Emery Co.	Utah	U.S.	Kimmeridgian-Tithonian	Late Jurassic	Right	dt7	15.63	11.77	?	?	0.753039	?	?	?	?	?	?	?	?	?	absent	absent	?	?	?	?	?	?	?	?	?	?	Incomplete; unknown	?	?
239		Allosaurus	UMNH VP 9351	Rdt9	fragilis	C.H. Pers. obs.	Morrison Formation	Cleveland-Lloyd Dinosaur Quarry, Emery Co.	Utah	U.S.	Kimmeridgian-Tithonian	Late Jurassic	Right	dt9	15.1	10.29	?	?	0.681457	?	?	?	?	0	100	?	?	?	absent	absent	?	?	?	?	?	?	?	?	?	?	Incomplete; unknown	?	?
240		Allosaurus	UMNH VP 9351	Rdt10	fragilis	C.H. Pers. obs.	Morrison Formation	Cleveland-Lloyd Dinosaur Quarry, Emery Co.	Utah	U.S.	Kimmeridgian-Tithonian	Late Jurassic	Right	dt10	15.23	9.44	?	?	0.619829	?	?	?	?	0	100	?	?	?	absent	absent	?	?	?	?	?	?	?	?	?	?	Incomplete; unknown	?	?
241		Allosaurus	UMNH VP 6476	Ldt4	fragilis	C.H. Pers. obs.	Morrison Formation	Cleveland-Lloyd Dinosaur Quarry, Emery Co.	Utah	U.S.	Kimmeridgian-Tithonian	Late Jurassic	Left	dt4	16.2	14.8	?	?	0.91358	?	?	?	?	0	100	1	extremely tenuous on labial	?	absent	absent	?	?	?	?	?	?	?	?	?	?	Incomplete; unknown	?	?
242		Allosaurus	UMNH VP 6476	Ldt5	fragilis	C.H. Pers. obs.	Morrison Formation	Cleveland-Lloyd Dinosaur Quarry, Emery Co.	Utah	U.S.	Kimmeridgian-Tithonian	Late Jurassic	Left	dt5	16.93	15.13	?	?	0.89368	?	?	?	?	close to root	100?	2	marginal, tenuous on labial side, very tenuous on lingual	DC short	absent	absent	?	?	?	?	?	?	?	?	?	?	Incomplete; unknown	?	?
243		Allosaurus	UMNH VP 6476	Ldt11	fragilis	C.H. Pers. obs.	Morrison Formation	Cleveland-Lloyd Dinosaur Quarry, Emery Co.	Utah	U.S.	Kimmeridgian-Tithonian	Late Jurassic	Left	dt11	18.44	10.87	?	?	0.589479	?	?	?	?	0	100	2	tenuous on lingual side	DB absent	absent	absent	?	?	?	?	?	?	?	?	?	?	Incomplete; unknown	?	?
244		Allosaurus	UMNH VP 9211	Lmx4	fragilis	C.H. Pers. obs.	Morrison Formation	Cleveland-Lloyd Dinosaur Quarry, Emery Co.	Utah	U.S.	Kimmeridgian-Tithonian	Late Jurassic	Left	mx4	14.94	7.17	31.47	36.57	0.47992	2.10643	13.14	6.21	0.472603	0	100	?	?	?	absent	absent	12.9	12.5	?	?	13.125	?	12.7	13.125	82.6088	0.952381	tip extremity worn out, almost intact	0.4	0.380952
245		Allosaurus	UMNH VP 9211	Lmx6	fragilis	C.H. Pers. obs.	Morrison Formation	Cleveland-Lloyd Dinosaur Quarry, Emery Co.	Utah	U.S.	Kimmeridgian-Tithonian	Late Jurassic	Left	mx6	14.99	6.54	29.27	33.5	0.436291	1.95264	13.89	7.43	0.534917	0	100	2/3mm	very tenuous on lingual	DC medium on labial side	absent	absent	?	?	?	16.66	?	?	?	16.66	97.5276	?	tip extremity worn out, almost intact	?	?
246		Allosaurus	UMNH VP 9229	Rmx7	fragilis	C.H. Pers. obs.	Morrison Formation	Cleveland-Lloyd Dinosaur Quarry, Emery Co.	Utah	U.S.	Kimmeridgian-Tithonian	Late Jurassic	Right	mx7	22.59	12.05	47.49	46.36	0.533422	2.10226	18.06	10.01	0.554264	0	100	3	very well visible on labial, tenuous on lingual	D short	absent	absent	12.5	11.5	?	12.5	11.5	19	12	14.33	136.106	1	tip worn out	0.434783	0.434783
247		Allosaurus	UMNH VP 9168	Lmx6	fragilis	C.H. Pers. obs.	Morrison Formation	Cleveland-Lloyd Dinosaur Quarry, Emery Co.	Utah	U.S.	Kimmeridgian-Tithonian	Late Jurassic	Left	mx6	20.57	13.93	47.29	50.15	0.6772	2.29898	19.29	10.42	0.540176	0	100	3	very well visible on labial, marginal undulations on DC labial,	absent	absent	absent	12.5	13.33	16.25	13	12.5	18	14.02	14.5	137.141	1.0664	tip extremity worn out, almost intact	0.375094	0.4
248		Allosaurus	UMNH VP 9218	Lmx1	fragilis	C.H. Pers. obs.	Morrison Formation	Cleveland-Lloyd Dinosaur Quarry, Emery Co.	Utah	U.S.	Kimmeridgian-Tithonian	Late Jurassic	Left	mx1	18.67	13.44	42.12	44.07	0.719871	2.25603	15.93	10.67	0.669805	0	100	?	?	D medium	absent	absent	13.125	10	?	12	10.5	16	11.56	12.83	108.08	0.952381	intact	0.5	0.47619
249		Allosaurus	UMNH VP 5837	Isolated Mesial	fragilis	C.H. Pers. obs.	Morrison Formation	Cleveland-Lloyd Dinosaur Quarry, Emery Co.	Utah	U.S.	Kimmeridgian-Tithonian	Late Jurassic	Isolated	Mesial	14.88	17.3	33.97	34.95	1.16263	2.28293	12.27	11.51	0.93806	close to root	100?	3	marginal undualtions well-visible close to MC on labial	absent	absent	absent	11.66	10	13	10	9	?	11.55	9.5	64.543	1.11111	tip worn out	0.5	0.555556
250		Allosaurus	UMNH VP 7438	Isolated Mesial	fragilis	C.H. Pers. obs.	Morrison Formation	Cleveland-Lloyd Dinosaur Quarry, Emery Co.	Utah	U.S.	Kimmeridgian-Tithonian	Late Jurassic	Isolated	Mesial	17.92	15.38	40.2	41.09	0.858259	2.2433	15.91	10.51	0.660591	0	100	2	very tenous close to DC on lingual	D short to medium	absent	absent	8.75	9.16	11.66	10.625	10	15.83	9.85	12.15	97.686	0.916	tip worn out	0.545852	0.5
251		Allosaurus	UMNH VP 6145	Isolated Mesial	fragilis	C.H. Pers. obs.	Morrison Formation	Cleveland-Lloyd Dinosaur Quarry, Emery Co.	Utah	U.S.	Kimmeridgian-Tithonian	Late Jurassic	Isolated	Mesial	10.93	12.56	25.25	27.09	1.14913	2.31016	9.65	9.06	0.93886	0	100	3	tenuous on labial close to DC	D short	absent	absent	10.83	10	12.5	10.62	10.25	15.83	11.11	12.23	61.7615	0.97561	tip worn out	0.5	0.487805
252		Allosaurus	UMNH VP 6239	Isolated Mesial	fragilis	C.H. Pers. obs.	Morrison Formation	Cleveland-Lloyd Dinosaur Quarry, Emery Co.	Utah	U.S.	Kimmeridgian-Tithonian	Late Jurassic	Isolated	Mesial	17.64	14.49	36.54	39.45	0.821429	2.07143	15.6	10.89	0.698077	0	100	3	very tenuous on lingual	?	absent	absent	10.62	8.75	13.33	11.66	10	?	10.82	10.83	79.1456	0.875	tip worn out + wear facet on lingual side	0.571429	0.5
253		Allosaurus	UMNH VP 5812	Isolated Mesiolateral	fragilis	C.H. Pers. obs.	Morrison Formation	Cleveland-Lloyd Dinosaur Quarry, Emery Co.	Utah	U.S.	Kimmeridgian-Tithonian	Late Jurassic	Isolated	Mesiolateral	10.67	9.53	24.03	26.51	0.893158	2.25211	9.49	6.33	0.667018	0	100	2/3mm	tenuous on labial	D short	absent	absent	15	11	16	13	12	14.375	14	13.125	63.0787	0.916667	intact	0.454545	0.416667
254		Allosaurus	UMNH VP 6189	Isolated Lateral	fragilis	C.H. Pers. obs.	Morrison Formation	Cleveland-Lloyd Dinosaur Quarry, Emery Co.	Utah	U.S.	Kimmeridgian-Tithonian	Late Jurassic	Isolated	Lateral	23.33	10.77	45.44	44.71	0.461637	1.94771	19.06	10.03	0.526233	0	100	3	marginal, visible on lingual, DBC	D medium	absent	absent	11.25	13.75	19.16	12	11	19	14.72	14	127.232	1.25	tip worn out	0.363636	0.454545
255		Allosaurus	UMNH VP 5841	Isolated Lateral	fragilis	C.H. Pers. obs.	Morrison Formation	Cleveland-Lloyd Dinosaur Quarry, Emery Co.	Utah	U.S.	Kimmeridgian-Tithonian	Late Jurassic	Isolated	Lateral	16.74	8.25	29.24	35.61	0.492832	1.74671	15.29	8.06	0.527142	8,83 not sure based on picture	?	2 on crown, 3 on root	very well visible on root, numerous on root and base of crown	D medium	absent	absent	16.66	17.5	22.5 (MBC)	15	12	20	15.41	15.66	91.5797	1.45833	tip extremity worn out, almost intact	0.285714	0.416667
256		Allosaurus	UMNH VP 5785	Isolated Lateral	fragilis	C.H. Pers. obs.	Morrison Formation	Cleveland-Lloyd Dinosaur Quarry, Emery Co.	Utah	U.S.	Kimmeridgian-Tithonian	Late Jurassic	Isolated	Lateral	15.63	10.09	35.91	38.86	0.645553	2.2975	13.67	8.51	0.622531	0	100	2 to 4	visible on labial, close to D on lingual	D medium	absent	absent	?	13.75	20	11.25	12	20	16.875	14.41	103.493	1.14583	too damaged	0.363636	0.416667
257		Allosaurus	UMNH VP 6101	Isolated Lateral	fragilis	C.H. Pers. obs.	Morrison Formation	Cleveland-Lloyd Dinosaur Quarry, Emery Co.	Utah	U.S.	Kimmeridgian-Tithonian	Late Jurassic	Isolated	Lateral	20.28	13.4	41.08	46.62	0.66075	2.29882	17.6	9.4	0.534091	0	100	3	tenuous on labial side, very tenuous on lingual	D short to medium	absent	absent	12.5	?	21.66	12.5	12.5	16.25	17.08	13.75	112.97	?	tip extremity worn out, almost intact	?	0.4
258		Allosaurus	UMNH VP 6113	Isolated Lateral	fragilis	C.H. Pers. obs.	Morrison Formation	Cleveland-Lloyd Dinosaur Quarry, Emery Co.	Utah	U.S.	Kimmeridgian-Tithonian	Late Jurassic	Isolated	Lateral	21.71	14.01	47.12	51.21	0.645325	2.17043	20.51	11.05	0.538762	0	100	3	marginal to DC on lingual	?	absent	absent	?	?	?	10	13.5	22.5	?	22.5	?	?	tip worn out mainly on mesial side	?	0.37037
259		Allosaurus	UMNH VP 6177	Isolated Lateral	fragilis	C.H. Pers. obs.	Morrison Formation	Cleveland-Lloyd Dinosaur Quarry, Emery Co.	Utah	U.S.	Kimmeridgian-Tithonian	Late Jurassic	Isolated	Lateral	16.24	8.01	32.22	35.8	0.493227	1.98399	14.55	6.79	0.466667	0	100	2/3mm labial, 3/5mm lingual	very tenuous on labial side, tenuous on lingual	D medium to well developped on lingual	absent	absent	12	14.5	27.5	?	13	22.5	18	17.75	114.381	1.11538	tip worn out	0.344828	0.384615
260		Allosaurus	UMNH VP 7436	Isolated Lateral	fragilis	C.H. Pers. obs.	Morrison Formation	Cleveland-Lloyd Dinosaur Quarry, Emery Co.	Utah	U.S.	Kimmeridgian-Tithonian	Late Jurassic	Isolated	Lateral	20.64	12.89	45.06	46.08	0.624516	2.18314	18.46	9.6	0.520043	0	100	2	marginal on labial close to DBC	?	absent	absent	12	12.5	?	11.5	12.5	13.33	12.25	12.44	112.109	1	tip extremity worn out, almost intact	0.4	0.4
261		Allosaurus	UMNH VP 6105	Isolated Lateral	fragilis	C.H. Pers. obs.	Morrison Formation	Cleveland-Lloyd Dinosaur Quarry, Emery Co.	Utah	U.S.	Kimmeridgian-Tithonian	Late Jurassic	Isolated	Lateral	22.87	15.86	49.87	55.28	0.693485	2.18059	20.35	11.17	0.548894	0	100	2	visible with light on labial, abundant	D medium	absent	absent	9.375	10.5	14.375	12.5	10.5	22.5	11.41	15.16	151.206	1	tip worn out	0.47619	0.47619
262		Allosaurus	UMNH VP 9211	Lmx04	fragilis	Smith et al., 2005	Morrison Formation	Cleveland-Lloyd Dinosaur Quarry, Emery Co.	Utah	U.S.	Kimmeridgian-Tithonian	Late Jurassic	Left	mx04	14.99	7.33	30.02	37.51	0.488993	2.00267	?	?	?	?	?	?	?	?	?	?	14	11.5	15	12	10	15	13.5	12.3	73.8492	1.15	?	0.434783	0.5
263		Allosaurus	UMNH VP 9211	Lmx06	fragilis	Smith et al., 2005	Morrison Formation	Cleveland-Lloyd Dinosaur Quarry, Emery Co.	Utah	U.S.	Kimmeridgian-Tithonian	Late Jurassic	Left	mx06	15.22	7.04	33.48	37.9	0.462549	2.19974	?	?	?	?	?	?	?	?	?	?	15	11	15	15	11	19	13.7	15	100.44	1	?	0.454545	0.454545
264		Allosaurus	UMNH VP 9275	Rmx07	fragilis	Smith et al., 2005	Morrison Formation	Cleveland-Lloyd Dinosaur Quarry, Emery Co.	Utah	U.S.	Kimmeridgian-Tithonian	Late Jurassic	Right	mx07	12.08	7.45	25.43	30.53	0.616722	2.10513	?	?	?	?	?	?	?	?	?	?	18	14	21	17	17.5	18	17.7	17.5	89.005	0.8	?	0.357143	0.285714
265		Allosaurus	UMNH VP 9273	Rmx07	fragilis	Smith et al., 2005	Morrison Formation	Cleveland-Lloyd Dinosaur Quarry, Emery Co.	Utah	U.S.	Kimmeridgian-Tithonian	Late Jurassic	Right	mx07	14.06	7.59	28.5	32.12	0.539829	2.02703	?	?	?	?	?	?	?	?	?	?	15	13.5	20	16	14	18.5	16.2	16.2	92.34	0.964286	?	0.37037	0.357143
266		Allosaurus	UMNH VP 9273	Rmx06	fragilis	Smith et al., 2005	Morrison Formation	Cleveland-Lloyd Dinosaur Quarry, Emery Co.	Utah	U.S.	Kimmeridgian-Tithonian	Late Jurassic	Right	mx06	14.78	7.21	25.52	29.82	0.487821	1.72666	?	?	?	?	?	?	?	?	?	?	16	12.5	22	18	15	18	16.8	17	86.768	0.833333	?	0.4	0.333333
267		Allosaurus	UMNH VP 9218	Lmx01	fragilis	Smith et al., 2005	Morrison Formation	Cleveland-Lloyd Dinosaur Quarry, Emery Co.	Utah	U.S.	Kimmeridgian-Tithonian	Late Jurassic	Left	mx01	17.32	13.03	38.25	42.19	0.752309	2.20843	?	?	?	?	?	?	?	?	?	?	11	9.5	20	12	11.5	13	13.5	12.2	93.33	0.826087	?	0.526316	0.434783
268		Allosaurus	UMNH VP 9369	Rd06	fragilis	Smith et al., 2005	Morrison Formation	Cleveland-Lloyd Dinosaur Quarry, Emery Co.	Utah	U.S.	Kimmeridgian-Tithonian	Late Jurassic	Right	d06	11.77	8.26	25.8	29.1	0.701784	2.19201	?	?	?	?	?	?	?	?	?	?	16	18	20	15	13.5	18	18	15.5	79.98	1.33333	?	0.277778	0.37037
269		Allosaurus	UMNH VP 9365	Rd02	fragilis	Smith et al., 2005	Morrison Formation	Cleveland-Lloyd Dinosaur Quarry, Emery Co.	Utah	U.S.	Kimmeridgian-Tithonian	Late Jurassic	Right	d02	10.63	9.77	24.62	27.61	0.919097	2.31609	?	?	?	?	?	?	?	?	?	?	12	10	15	12	11	13.7	12.3	12.2	60.0728	0.909091	?	0.5	0.454545
270		Allosaurus	UMNH VP 1251	Rpm05	fragilis	Smith et al., 2005	Morrison Formation	Cleveland-Lloyd Dinosaur Quarry, Emery Co.	Utah	U.S.	Kimmeridgian-Tithonian	Late Jurassic	Right	pm05	16.1	13.82	40.85	40.61	0.858385	2.53727	?	?	?	?	?	?	?	?	?	?	11	10	14	12	11	17.5	11.7	13.5	110.295	0.909091	?	0.5	0.454545
271		Allosaurus	USNM 8335	Rmx1	fragilis	C.H. Pers. obs.	Morrison Formation	Canyon City, Garden Park, Quarry I	Colorado	U.S.	Kimmeridgian-Tithonian	Late Jurassic	Right	mx1	16.7	13.4	34.1	45	0.802395	2.04192	15.3	8.9	0.581699	0	100	0	?	?	absent	absent	11.66	12	?	11.66	11	?	11.83	11.33	77.2706	?	tip extremity worn out	0.416667	0.454545
272		Allosaurus	USNM 8335	Rmx10	fragilis	C.H. Pers. obs.	Morrison Formation	Canyon City, Garden Park, Quarry I	Colorado	U.S.	Kimmeridgian-Tithonian	Late Jurassic	Right	mx10	18.7	6.9	31.9	35	0.368984	1.70588	14.5	7.4	0.510345	0	100	0	?	?	absent	absent	13.5	13	?	11.25	13.33	17	13.25	13.86	88.4268	?	tip worn out	0.384615	0.375094
273		Allosaurus	CM 1254	Isolated	fragilis	C.H. Pers. obs.	Morrison Formation	Freeseout Hills, Quarry N - Carbon Co.	Wyoming	U.S.	Kimmeridgian-Tithonian	Late Jurassic	/	Isolated	19.6	9.5	?	?	0.484694	?	?	?	?	6	?	3	?	DC medium	absent	absent	15	16	22.5	12.5	15	16.66	17.83	14.72	?	1.06667	tip missing; unknown	0.3125	0.333333
274		Allosaurus	CM 11844	Rpmx	fragilis	C.H. Pers. obs.	Morrison Formation	Carnegie Museum Quarry - Uintah Co.	Utah	U.S.	Kimmeridgian-Tithonian	Late Jurassic	/	right pmx	17.9	17.3	39.5	39.2	0.96648	2.2067	14.2	11.2	0.788732	0	100	0	?	?	absent	absent	?	10	12	9	12	19	11	11	86.9	0.833333	tip reconstructed; unknown	0.5	0.416667
275		Allosaurus	CM 11844	Isolated	fragilis	C.H. Pers. obs.	Morrison Formation	Carnegie Museum Quarry - Uintah Co.	Utah	U.S.	Kimmeridgian-Tithonian	Late Jurassic	/	Isolated	18.2	14.4	50.8	56.2	0.791209	2.79121	18	10.7	0.594444	0	100	4	?	?	absent	absent	?	?	?	?	?	?	?	?	?	?	tip reconstructed; unknown	?	?
276		Allosaurus	CM 21703	Isolated	fragilis	C.H. Pers. obs.	Morrison Formation	Carnegie Museum Quarry - Uintah Co.	Utah	U.S.	Kimmeridgian-Tithonian	Late Jurassic	/	Isolated	26.6	?	58.4	64	?	2.19549	20.8	12.8	0.615385	~30	?	3	?	?	absent	absent	10	8.5	8	?	9	16	8.83	12.5	146	0.944444	tip worn out, especially distal side	0.588235	0.555556
277		Allosaurus	CM 21703	Lpm02	fragilis	C.H. Pers. obs.	Morrison Formation	Carnegie Museum Quarry - Uintah Co.	Utah	U.S.	Kimmeridgian-Tithonian	Late Jurassic	Left	pm02	12.6	14.5	33.8	34.8	1.15079	2.68254	12.6	9.8	0.777778	0	100	0	?	?	absent	absent	?	10	12.5	?	10	11	11.25	10.5	70.98	1	tip worn out, wear facet on lingual side	0.5	0.5
278		Allosaurus	CM 21703	Lpm03	fragilis	C.H. Pers. obs.	Morrison Formation	Carnegie Museum Quarry - Uintah Co.	Utah	U.S.	Kimmeridgian-Tithonian	Late Jurassic	Left	pm03	15.6	12.6	33.3	37	0.807692	2.13462	11.4	9.4	0.824561	0	100	0	?	?	absent	absent	?	?	?	?	?	?	?	?	?	?	tip extremity worn out, not far from being intact	?	?
279		Allosaurus	CM 21703	Lpm04	fragilis	C.H. Pers. obs.	Morrison Formation	Carnegie Museum Quarry - Uintah Co.	Utah	U.S.	Kimmeridgian-Tithonian	Late Jurassic	Left	pm04	15.5	12.8	34.8	35.1	0.825806	2.24516	12.4	8.8	0.709677	0	100	0	?	?	absent	absent	?	10.5	?	?	11	13	10.5	12	83.52	0.954545	tip worn out, wear facet on lingual side	0.47619	0.454545
280		Allosaurus	CM 21703	Lpm02	fragilis	Smith et al., 2005	Morrison Formation	Carnegie Museum Quarry - Uintah Co.	Utah	U.S.	Kimmeridgian-Tithonian	Late Jurassic	Left	pm02	14.05	12.52	34.31	34.82	0.891103	2.44199	?	?	?	?	?	?	?	?	?	?	11	10	11	9	10	11	10.7	10	68.62	1	?	0.5	0.5
281		Allosaurus	CM 21703	Lpm03	fragilis	Smith et al., 2005	Morrison Formation	Carnegie Museum Quarry - Uintah Co.	Utah	U.S.	Kimmeridgian-Tithonian	Late Jurassic	Left	pm03	12.79	10.5	34.2	36.53	0.820954	2.67396	?	?	?	?	?	?	?	?	?	?	11	9.5	11.5	9.5	10	10	10.7	9.8	67.032	0.95	?	0.526316	0.5
282		Allosaurus	CM 21703	Lpm04	fragilis	Smith et al., 2005	Morrison Formation	Carnegie Museum Quarry - Uintah Co.	Utah	U.S.	Kimmeridgian-Tithonian	Late Jurassic	Left	pm04	13.73	10.65	33.19	35.51	0.775674	2.41733	?	?	?	?	?	?	?	?	?	?	11.5	10.5	12.7	9.5	11	11	11.6	10.5	69.699	0.954545	?	0.47619	0.454545
283		Allosaurus	AMNH 600	Rpmx02, unerupted	fragilis	C.H. Pers. obs.	Morrison Formation	Bone Cabin Quarry	Wyoming	U.S.	Kimmeridgian-Tithonian	Late Jurassic	Right	pmx02, unerupted	?	?	?	?	?	?	?	?	?	?	?	0	absent	absent	absent	absent	?	9	?	9	9.5	?	9	9.25	?	0.947368	Intact but unerupted	0.555556	0.526316
284		Allosaurus	AMNH 851	Rpmx03	fragilis	C.H. Pers. obs.	Morrison Formation	Bone Cabin Quarry	Wyoming	U.S.	Kimmeridgian-Tithonian	Late Jurassic	Right	pmx03	17.95	17.72	36.4	38.02	0.987187	2.02786	13.46	12.21	0.907132	~5	?	2/5mm	labial well visible	MA short	absent	absent	10	10	9.5	10	9.5	13.5	9.83	11	80.08	1.05263	Missing tip; unknown; strongly worn out?	0.5	0.526316
285		Allosaurus	AMNH 851	Rpmx04	fragilis	C.H. Pers. obs.	Morrison Formation	Bone Cabin Quarry	Wyoming	U.S.	Kimmeridgian-Tithonian	Late Jurassic	Right	pmx04	17.77	?	>28,84	>30,55	?	?	15.13	11.57	0.764706	the end?	?	2	labial, tenuous	MA medium	absent	absent	8.5	8	10	9	10	13	8.83	10.66	?	0.8	Missing tip; unknown	0.625	0.5
286		Allosaurus	AMNH 851	Rmx03	fragilis	C.H. Pers. obs.	Morrison Formation	Bone Cabin Quarry	Wyoming	U.S.	Kimmeridgian-Tithonian	Late Jurassic	Right	mx03	22.81	>12,77	?	?	?	?	?	?	?	?	?	?	?	?	?	?	?	?	?	?	?	?	?	?	?	?	Incomplete; unknown	?	?
287		Allosaurus	AMNH 851	Rmx09	fragilis	C.H. Pers. obs.	Morrison Formation	Bone Cabin Quarry	Wyoming	U.S.	Kimmeridgian-Tithonian	Late Jurassic	Right	mx09	22.2	9.74	43.67	48.75	0.438739	1.96712	19.58	9.67	0.493871	?	?	3/6mm	well visible on both sides	D short	absent	absent	10	10	?	10	11	14	10	11.66	101.838	0.909091	Intact; wear facet on lingual side of apex?	0.5	0.454545
288		Allosaurus	AMNH 851	Rmx11, unerupted	fragilis	C.H. Pers. obs.	Morrison Formation	Bone Cabin Quarry	Wyoming	U.S.	Kimmeridgian-Tithonian	Late Jurassic	Right	mx11, unerupted	?	?	?	?	?	?	?	?	?	?	?	?	?	?	absent	absent	11	10	10	11	11	?	10.33	11	?	0.909091	Intact but unerupted	0.5	0.454545
289		Allosaurus	LACM 46030	Comppm01	fragilis	Smith et al., 2005	Morrison Formation	Emery County	Utah	U.S.	Kimmeridgian-Tithonian	Late Jurassic	Comp/	pm01	16.1	15.3	33.9	36.69	0.950311	2.10559	?	?	?	?	?	?	?	?	?	?	8	9.5	13	9.5	10	/	10.2	9.75	66.105	0.95	?	0.526316	0.5
290		Allosaurus	LACM 46030	Comppm02	fragilis	Smith et al., 2005	Morrison Formation	Emery County	Utah	U.S.	Kimmeridgian-Tithonian	Late Jurassic	Comp/	pm02	16	14.6	33.89	35.99	0.9125	2.11813	?	?	?	?	?	?	?	?	?	?	8	9.3	12.5	9.8	10.3	12.8	9.9	10.9	73.8802	0.902913	?	0.537634	0.485437
291		Allosaurus	LACM 46030	Comppm03	fragilis	Smith et al., 2005	Morrison Formation	Emery County	Utah	U.S.	Kimmeridgian-Tithonian	Late Jurassic	Comp/	pm03	15.5	14.9	36.81	38.3	0.96	2.37	?	?	?	?	?	?	?	?	?	?	9	9.5	13	10.8	10	13.3	10.5	11.3	83.1906	0.95	?	0.526316	0.5
292		Allosaurus	LACM 46030	Comppm04	fragilis	Smith et al., 2005	Morrison Formation	Emery County	Utah	U.S.	Kimmeridgian-Tithonian	Late Jurassic	Comp/	pm04	16.3	13.5	37.69	38.98	0.828221	2.31227	?	?	?	?	?	?	?	?	?	?	9.3	9.8	12.5	10.3	10	13	10.5	11.1	83.6718	0.98	?	0.510204	0.5
293		Allosaurus	LACM 46030	Lpm05	fragilis	Smith et al., 2005	Morrison Formation	Emery County	Utah	U.S.	Kimmeridgian-Tithonian	Late Jurassic	Left	pm05	17.5	12.8	38.85	40.26	0.731429	2.22	?	?	?	?	?	?	?	?	?	?	11	11	12	11.5	11	13.5	11.3	12	93.24	1	?	0.454545	0.454545
