# Supplementary material for: Bite and tooth marks on sauropod dinosaurs from the Morrison Formation
Source: PeerJ. 2023 Nov 14;11:e16327. doi: 10.7717/peerj.16327 (PMC10655710; doi:10.7717/peerj.16327)
Supplement: Supplemental Information 5 — Updated formulas and data from Drumheller et al. (2020) for body size estimation of trace maker. [file peerj-11-16327-s005.xlsx]

## Sheet: Published formulas
	Taxa (Genus)	Specimen	Position of striated bite mark	Source	Number of striations	Smallest striations width (mm)	Largest striations width (mm)	Body length (smallest mesial) in m	Body length (largest mesial) in m	Body length (smallest distal) in m	Body length (largest distal) in m	Skull length (smallest mesial) in m	Skull length (largest mesial) in m	Skull length (smallest distal) in m	Skull length (largest distal) in m	CBL (smallest mesial) in mm	CBL (largest mesial) in mm	CBL (smallest distal) in mm	CBL (largest distal) in mm
1	Indeterminate eusauropod	AMNH FARB 366	Ilium	This study (using Drumheller et al.'s published formulas)	10-11	0.7	1	35.3402	157.558	108.062	671.655	826.898	4707.03	3333.13	28541.8	106.253	704.422	171.496	1858.27
2	Camarasaurus sp.	AMNH FARB 825	Caudal vertebra	This study (using Drumheller et al.'s published formulas)	3	?	?	?	?	?	?	?	?	?	?	?	?	?	?
3	Camarasaurus supremus	AMNH FARB 5760 D-x-128	Dorsal vertebra	This study (using Drumheller et al.'s published formulas)	3	0.6	0.7	21.4724	35.3402	58.7735	108.062	463.113	826.898	1629.21	3333.13	56.5604	106.253	77.5	171.496
4	Camarasaurus supremus	AMNH FARB 5760 Sc-3	Scapula	This study (using Drumheller et al.'s published formulas)	3	0.8	1	58.1647	157.558	198.684	671.655	1476.44	4707.03	6819.13	28541.8	199.606	704.422	379.495	1858.27
5	Camarasaurus supremus	AMNH FARB 5760 Cd-o-21	Posterior caudal vertebra	This study (using Drumheller et al.'s published formulas)	4-5	0.7	0.9	35.3402	95.7303	108.062	365.304	826.898	2636.22	3333.13	13951	106.253	374.975	171.496	839.765
6	Allosaurus sp.	MWC 8675	Dorsal centrum	Drumheller et al., 2020 (using Drumheller et al.'s published formulas)	3	0.2043		2.98968		5.27946		46.7147		95.9042		4.66624		3.34447
7	Mymoorapelta maysi	MWC 3763	Dorsal rib	Drumheller et al., 2020 (using Drumheller et al.'s published formulas)	7	0.4894		12.3752		29.9677		243.913		738.153		28.1615		32.1947
8	Theropoda indet.	MWC 7263	Pedal claw	Drumheller et al., 2020 (using Drumheller et al.'s published formulas)	3	0.3048		4.93284		9.73651		83.6521		196.91		8.79359		7.43025
9	Allosaurus sp.	MWC 2730	Caudal vertebra	Drumheller et al., 2020 (using Drumheller et al.'s published formulas)	7	0.4991		12.988		31.7914		258.022		791.228		29.9377		34.7732
10	Allosaurus sp.	MWC 9407	Caudal centrum	Drumheller et al., 2020 (using Drumheller et al.'s published formulas)	11	0.3905		7.56037		16.4086		137.48		363.655		15.0952		14.6767
11	Theropoda indet.	MWC 7263	Pedal claw	Drumheller et al., 2020 (using Drumheller et al.'s published formulas)	4	0.6505		27.6157		79.9373		620.624		2338.67		77.7672		115.745

## Sheet: Corrected formulas
	Taxa (Genus)	Specimen	Position of striated bite mark	Source	Number of striations	Smallest striations width (mm)	Largest striations width (mm)	Body length (smallest mesial) in m (corrected formula)	Body length (largest mesial) in m (corrected formula)	Body length (smallest distal) in m (corrected formula)	Body length (largest distal) in m (corrected formula)	Skull length (smallest mesial) in m (corrected formula)	Skull length (largest mesial) in m (corrected formula)	Skull length (smallest distal) in m (corrected formula)	Skull length (largest distal) in m (corrected formula)	CBL (smallest mesial) in mm	CBL (largest mesial) in mm	CBL (smallest distal) in mm	CBL (largest distal) in mm
1	Indeterminate eusauropod	AMNH FARB 366	Ilium	This study (Results obtained by changing Drumheller et al.'s (2020) formulas to match their results)	10-11	0.7	1	30.2823	135.008	46.6878	290.186	4.04815	23.0437	6.75178	57.816	106.253	704.422	171.496	1858.27
2	Camarasaurus sp.	AMNH FARB 825	Caudal vertebra	This study (Results obtained by changing Drumheller et al.'s (2020) formulas to match their results)	3	?	?	?	?	?	?	?	?	?	?	?	?	?	?
3	Camarasaurus supremus	AMNH FARB 5760 D-x-128	Dorsal vertebra	This study (Results obtained by changing Drumheller et al.'s (2020) formulas to match their results)	3	0.6	0.7	18.3992	30.2823	25.3929	46.6878	2.26721	4.04815	3.30021	6.75178	56.5604	106.253	77.5	171.496
4	Camarasaurus supremus	AMNH FARB 5760 Sc-3	Scapula	This study (Results obtained by changing Drumheller et al.'s (2020) formulas to match their results)	3	0.8	1	49.8401	135.008	85.841	290.186	7.22806	23.0437	13.8132	57.816	199.606	704.422	379.495	1858.27
5	Camarasaurus supremus	AMNH FARB 5760 Cd-o-21	Posterior caudal vertebra	This study (Results obtained by changing Drumheller et al.'s (2020) formulas to match their results)	4-5	0.7	0.9	30.2823	82.0292	46.6878	157.829	4.04815	12.9059	6.75178	28.26	106.253	374.975	171.496	839.765
6	Allosaurus sp.	MWC 8675	Dorsal centrum	Results obtained by Drumheller et al. (2020) based on incorrectly written formulas	3	0.2043		2.56179		2.28098		0.228696		0.194269
7	Mymoorapelta maysi	MWC 3763	Dorsal rib	Results obtained by Drumheller et al. (2020) based on incorrectly written formulas	7	0.4894		10.604		12.9475		1.1941		1.49525
8	Theropoda indet.	MWC 7263	Pedal claw	Results obtained by Drumheller et al. (2020) based on incorrectly written formulas	3	0.3048		4.22684		4.20663		0.409527		0.398873
9	Allosaurus sp.	MWC 2730	Caudal vertebra	Results obtained by Drumheller et al. (2020) based on incorrectly written formulas	7	0.4991		11.1291		13.7354		1.26317		1.60276
10	Allosaurus sp.	MWC 9407	Caudal centrum	Results obtained by Drumheller et al. (2020) based on incorrectly written formulas	11	0.3905		6.47831		7.0893		0.673046		0.736641
11	Theropoda indet.	MWC 7263	Pedal claw	Results obtained by Drumheller et al. (2020) based on incorrectly written formulas	4	0.6505		23.6633		34.5367		3.03832		4.73734
